# Supplementary material for: Corpora Amylacea in the Human Brain Exhibit Neoepitopes of a Carbohydrate Nature
Source: PubMed Central journal article supplement (PMC8273382; doi:10.3389/fimmu.2021.618193), 2021-06-28
Supplement: DataSheet_1.pdf [file DataSheet_1.pdf]

**Table S1**

| Gender | Age of death (years) | Post-mortem delay (hh:mm) | Neuropathological diagnosis <sup>a</sup> | Braak stage - CERAD |
|--------|----------------------|---------------------------|------------------------------------------|---------------------|
| Female | 85                   | 5:00                      | AD                                       | V - C               |
| Male   | 88                   | 3:00                      | AD                                       | V - C               |
| Male   | 91                   | 4:30                      | AD + LBD + SVD                           | VI - C              |
| Male   | 70                   | 4:30                      | SVE                                      | None                |
| Male   | 80                   | 10:00                     | SVE                                      | None                |
| Male   | 86                   | 10:15                     | LBD                                      | None                |

Medical data of the brain donors. <sup>a</sup>AD: Alzheimer's disease with a high level of neuropathological change (A3B3C3); LBD: Lewy body dementia; SVD: small vessel disease; SVE: subcortical vascular encephalopathy.

**Table S2**

| Gender | Age of death (years) | Post-mortem delay (hh:mm) | Neuropathological diagnosis <sup>a</sup> |
|--------|----------------------|---------------------------|------------------------------------------|
| Female | 65                   | 6:15                      | HD, III                                  |
| Male   | 74                   | 10:34                     | LBD, PD                                  |
| Male   | 92                   | 6:20                      | Not affected                             |

Medical data of the CSF donors. <sup>a</sup>HD: Huntington's disease; LBD: Lewy body dementia; PD: Parkinson's disease
