# Supplementary material for: Corpora Amylacea in the Human Brain Exhibit Neoepitopes of a Carbohydrate Nature
Source: Front Immunol. 2021 Jun 28;12:618193. doi: 10.3389/fimmu.2021.618193 (PMC8273382; doi:10.3389/fimmu.2021.618193)
Supplement: Supplementary file 2 [file DataSheet_2.pdf]

ConA

| Glc | IM CA  | IM BKG | INT-BKG | RI%      |
|-----|--------|--------|---------|----------|
| 0   | 66,131 | 5,692  | 60,439  | 99,99628 |
| 0   | 60,83  | 8,418  | 52,412  | 86,71561 |
| 0   | 81,087 | 7,581  | 73,506  | 121,6156 |
| 0   | 62,966 | 7,542  | 55,424  | 91,69896 |
| 0   | 84,011 | 8,788  | 75,223  | 124,4564 |
| 0   | 66,32  | 7,485  | 58,835  | 97,34246 |
| 0   | 78,131 | 10,086 | 68,045  | 112,5804 |
| 0   | 70,457 | 4,881  | 65,576  | 108,4954 |
| 0   | 79,463 | 9,367  | 70,096  | 115,9738 |
| 0   | 59,685 | 5,814  | 53,871  | 89,12953 |
| 0   | 61,038 | 7,299  | 53,739  | 88,91113 |
| 0   | 71,541 | 8,78   | 62,761  | 103,838  |
| 0   | 74,574 | 6,179  | 68,395  | 113,1595 |
| 0   | 63,626 | 8,482  | 55,144  | 91,2357  |
| 0   | 76,49  | 9,972  | 66,518  | 110,054  |
| 0   | 60,72  | 7,585  | 53,135  | 87,91182 |
| 0   | 65,598 | 7,728  | 57,87   | 95,74587 |
| 0   | 64,89  | 7,813  | 57,077  | 94,43385 |
| 0   | 63,307 | 8,013  | 55,294  | 91,48388 |
| 0   | 54,553 | 9,088  | 45,465  | 75,22181 |
| 50  | 0,208  | 4,213  | 0       | 0        |
| 50  | 1,187  | 5,097  | 0       | 0        |
| 50  | 3,06   | 3,297  | 0       | 0        |
| 50  | 3,233  | 6,348  | 0       | 0        |
| 50  | 0,621  | 5,054  | 0       | 0        |
| 50  | 0,099  | 4,286  | 0       | 0        |
| 50  | 0,398  | 5,409  | 0       | 0        |
| 50  | 1,186  | 3,955  | 0       | 0        |
| 50  | 4,719  | 3,187  | 1,532   | 2,534693 |
| 50  | 0,17   | 3,543  | 0       | 0        |
| 50  | 2,77   | 3,636  | 0       | 0        |
| 50  | 2,595  | 5,219  | 0       | 0        |
| 50  | 0,727  | 4,267  | 0       | 0        |
| 50  | 2,502  | 3,591  | 0       | 0        |
| 50  | 1,309  | 4,197  | 0       | 0        |
| 50  | 2,46   | 5,435  | 0       | 0        |
| 50  | 3,296  | 5,95   | 0       | 0        |
| 50  | 3,386  | 5,244  | 0       | 0        |
| 50  | 3,159  | 4,987  | 0       | 0        |
| 50  | 0,475  | 6,332  | 0       | 0        |
| 50  | 3,719  | 4,8    | 0       | 0        |
| 50  | 2,463  | 5,877  | 0       | 0        |
| 50  | 3,806  | 6,847  | 0       | 0        |
| 50  | 0,194  | 4,312  | 0       | 0        |
| 100 | 0,155  | 4,637  | 0       | 0        |
| 100 | 1,36   | 3,867  | 0       | 0        |
| 100 | 0,105  | 4,026  | 0       | 0        |
| 100 | 1,629  | 4,263  | 0       | 0        |
| 100 | 1,642  | 3,323  | 0       | 0        |
| 100 | 0,595  | 3,603  | 0       | 0        |
| 100 | 0,584  | 4,657  | 0       | 0        |
| 100 | 1,182  | 3,201  | 0       | 0        |
| 100 | 1,07   | 3,705  | 0       | 0        |
| 100 | 1,006  | 2,203  | 0       | 0        |
| 100 | 2,054  | 4,851  | 0       | 0        |
| 100 | 1,119  | 5,46   | 0       | 0        |
| 100 | 1,354  | 3,669  | 0       | 0        |
| 100 | 1,44   | 4,904  | 0       | 0        |
| 200 | 0,14   | 1,717  | 0       | 0        |
| 200 | 0,211  | 1,676  | 0       | 0        |
| 200 | 1,136  | 2,549  | 0       | 0        |
| 200 | 0,052  | 2,547  | 0       | 0        |
| 200 | 0,887  | 2,883  | 0       | 0        |
| 200 | 1,044  | 2,486  | 0       | 0        |
| 200 | 0,838  | 2,603  | 0       | 0        |
| 200 | 0,086  | 2,192  | 0       | 0        |

p62

| Glc | IM CA  | IM BKG | CA-BKG | RI%    |
|-----|--------|--------|--------|--------|
| 0   | 10,768 | 2,036  | 8,73   | 72,89  |
| 0   | 14,514 | 2,142  | 12,37  | 103,27 |
| 0   | 8,931  | 1,933  | 7,00   | 58,42  |
| 0   | 5,178  | 2,069  | 3,11   | 25,95  |
| 0   | 24,677 | 0,974  | 23,70  | 197,86 |
| 0   | 18,406 | 1,494  | 16,91  | 141,17 |
| 0   | 7,88   | 0,537  | 7,34   | 61,29  |
| 0   | 13,999 | 1,057  | 12,94  | 108,03 |
| 0   | 15,425 | 1,329  | 14,10  | 117,66 |
| 0   | 13,752 | 1,151  | 12,60  | 105,19 |
| 0   | 18,234 | 1,708  | 16,53  | 137,95 |
| 0   | 13,939 | 1,371  | 12,57  | 104,91 |
| 0   | 9,429  | 2,01   | 7,42   | 61,93  |
| 0   | 6,869  | 1,53   | 5,34   | 44,57  |
| 0   | 9,618  | 0,939  | 8,68   | 72,45  |
| 0   | 12,793 | 1,145  | 11,65  | 97,23  |
| 0   | 14,843 | 0,612  | 14,23  | 118,79 |
| 0   | 12,081 | 0,615  | 11,47  | 95,71  |
| 0   | 22,384 | 1,431  | 20,95  | 174,90 |
| 0   | 22,74  | 1,432  | 21,31  | 177,87 |
| 0   | 8,987  | 0,884  | 8,10   | 67,64  |
| 0   | 9,855  | 0,992  | 8,86   | 73,98  |
| 0   | 13,126 | 1,538  | 11,59  | 96,73  |
| 0   | 16,367 | 1,326  | 15,04  | 121,69 |
| 0   | 11,444 | 3,010  | 8,434  | 28,479 |
| 0   | 16,934 | 1,389  | 15,55  | 129,76 |
| 0   | 15,733 | 1,099  | 14,63  | 122,16 |
| 0   | 8,607  | 1,527  | 7,08   | 59,10  |
| 0   | 9,943  | 2,301  | 7,64   | 63,79  |
| 0   | 11,099 | 1,077  | 10,02  | 83,66  |
| 0   | 13,572 | 1,042  | 12,53  | 104,59 |
| 0   | 17,209 | 1,05   | 16,16  | 134,89 |
| 0   | 19,235 | 1,541  | 17,69  | 147,70 |
| 0   | 12,197 | 1,313  | 10,88  | 90,85  |
| 0   | 14,697 | 2,203  | 12,49  | 104,29 |
| 0   | 17,589 | 1,407  | 16,18  | 135,08 |
| 0   | 12,539 | 1,244  | 11,30  | 94,28  |
| 0   | 16,909 | 1,052  | 15,86  | 132,36 |
| 0   | 12,985 | 0,299  | 12,69  | 105,90 |
| 0   | 12,638 | 0,897  | 11,74  | 98,01  |
| 0   | 8,912  | 0,735  | 8,18   | 68,26  |
| 0   | 15,347 | 0,881  | 14,47  | 120,75 |
| 0   | 10,375 | 0,939  | 9,44   | 78,77  |
| 0   | 8,323  | 1,16   | 7,16   | 59,79  |
| 0   | 8,747  | 0,894  | 7,85   | 65,55  |
| 0   | 7,355  | 0,555  | 6,80   | 56,76  |
| 0   | 11,6   | 0,856  | 10,74  | 89,68  |
| 0   | 10,636 | 0,618  | 10,02  | 83,62  |
| 0   | 7,171  | 1,067  | 6,10   | 50,95  |
| 0   | 16,862 | 1,147  | 15,72  | 131,18 |
| 0   | 7,419  | 1,266  | 6,15   | 51,36  |
| 0   | 8,367  | 0,956  | 7,41   | 61,86  |
| 0   | 26,837 | 0,96   | 25,88  | 216,01 |
| 0   | 16,546 | 1,071  | 15,48  | 129,18 |
| 0   | 18,617 | 0,798  | 17,82  | 148,74 |
| 50  | 19,526 | 0,946  | 18,58  | 155,09 |
| 50  | 12,063 | 0,887  | 11,18  | 93,29  |
| 50  | 15,017 | 0,791  | 14,23  | 118,75 |
| 50  | 16,717 | 1,043  | 15,67  | 130,84 |
| 50  | 15,139 | 0,957  | 14,18  | 118,38 |
| 50  | 13,458 | 0,836  | 12,62  | 105,36 |
| 50  | 7,061  | 0,842  | 6,22   | 51,91  |
| 50  | 16,742 | 0,913  | 15,83  | 132,13 |
| 50  | 24,795 | 1,186  | 23,61  | 197,07 |
| 50  | 13,532 | 0,613  | 12,92  | 107,84 |
| 50  | 21,812 | 1,034  | 20,78  | 173,44 |
| 50  | 7,275  | 0,844  | 6,43   | 53,68  |

MS-IgM S1

| Glc | IM CA  | IM BKG | IM-BKG | RI%     |
|-----|--------|--------|--------|---------|
| 0   | 53,691 | 2,576  | 51,115 | 136,163 |
| 0   | 46,883 | 2,241  | 44,642 | 118,919 |
| 0   | 11,116 | 4,290  | 6,826  | 18,183  |
| 0   | 49,494 | 2,778  | 46,716 | 124,444 |
| 0   | 49,184 | 2,282  | 46,902 | 124,940 |
| 0   | 30,876 | 2,465  | 28,411 | 75,683  |
| 0   | 46,194 | 2,055  | 44,139 | 117,580 |
| 0   | 58,717 | 2,136  | 56,581 | 150,723 |
| 0   | 18,682 | 2,332  | 16,350 | 43,554  |
| 0   | 55,152 | 1,797  | 53,355 | 142,130 |
| 0   | 57,327 | 2,805  | 54,522 | 145,238 |
| 0   | 39,978 | 3,213  | 36,765 | 97,936  |
| 0   | 46,261 | 1,781  | 44,480 | 118,488 |
| 0   | 58,868 | 2,657  | 56,211 | 149,738 |
| 0   | 41,717 | 2,531  | 39,186 | 104,386 |
| 0   | 40,281 | 2,464  | 37,817 | 100,739 |
| 0   | 47,342 | 2,512  | 44,830 | 119,420 |
| 0   | 32,643 | 2,360  | 30,283 | 80,669  |
| 0   | 29,814 | 1,748  | 28,066 | 74,764  |
| 0   | 52,459 | 1,743  | 50,716 | 135,100 |
| 0   | 42,216 | 2,491  | 39,725 | 105,821 |
| 0   | 14,467 | 2,723  | 11,744 | 31,284  |
| 0   | 16,367 | 1,922  | 14,445 | 38,479  |
| 0   | 11,444 | 3,010  | 8,434  | 28,479  |
| 0   | 37,952 | 2,610  | 35,342 | 94,146  |
| 0   | 51,358 | 2,043  | 49,315 | 131,368 |
| 0   | 55,903 | 2,178  | 53,725 | 143,115 |
| 0   | 47,875 | 2,763  | 45,112 | 120,171 |
| 0   | 15,278 | 2,382  | 12,896 | 34,353  |
| 50  | 34,482 | 2,700  | 30,782 | 55,360  |
| 50  | 34,889 | 2,560  | 32,329 | 86,120  |
| 50  | 20,164 | 1,729  | 18,435 | 49,108  |
| 50  | 32,812 | 2,736  | 30,076 | 80,118  |
| 50  | 53,798 | 2,601  | 51,197 | 136,381 |
| 50  | 18,574 | 3,239  | 15,335 | 40,850  |
| 50  | 50,883 | 2,749  | 48,134 | 128,222 |
| 50  | 11,250 | 2,390  | 8,860  | 23,602  |
| 50  | 21,074 | 2,706  | 18,368 | 43,077  |
| 50  | 33,617 | 1,994  | 31,623 | 84,239  |
| 50  | 38,299 | 2,305  | 35,994 | 95,883  |
| 50  | 56,380 | 2,365  | 54,015 | 143,888 |
| 50  | 46,511 | 2,022  | 44,489 | 118,512 |
| 50  | 36,281 | 2,738  | 33,543 | 89,353  |
| 50  | 38,323 | 2,061  | 36,262 | 96,596  |
| 50  | 34,575 | 2,516  | 32,059 | 85,400  |
| 50  | 24,317 | 2,273  | 22,044 | 58,722  |
| 50  | 35,417 | 1,392  | 34,025 | 90,637  |
| 50  | 24,997 | 1,595  | 23,402 | 62,339  |
| 50  | 13,505 | 1,764  | 11,741 | 31,276  |
| 100 | 12,536 | 2,459  | 10,077 | 26,844  |
| 100 | 33,181 | 2,772  | 30,409 | 81,005  |
| 100 | 21,419 | 4,745  | 16,674 | 44,417  |
| 100 | 27,408 | 3,188  | 24,220 | 64,518  |
| 100 | 16,528 | 2,975  | 13,553 | 36,103  |
| 100 | 26,635 | 2,230  | 24,405 | 65,011  |
| 100 | 17,580 | 2,596  | 14,984 | 39,915  |
| 100 | 29,737 | 2,802  | 26,935 | 71,751  |
| 100 | 10,864 | 2,441  | 8,423  | 22,438  |
| 100 | 12,936 | 3,174  | 9,762  | 26,004  |
| 100 | 21,923 | 2,689  | 19,234 | 51,236  |
| 100 | 13,160 | 2,661  | 10,499 | 27,968  |
| 100 | 13,067 | 3,102  | 9,965  | 26,545  |
| 100 | 27,809 | 2,966  | 24,843 | 66,178  |
| 100 | 30,818 | 2,882  | 27,936 | 74,417  |
| 100 | 22,673 | 3,556  | 19,117 | 50,925  |
| 100 | 35,206 | 2,915  | 32,291 | 86,018  |

MS-IgM S2

| Glc | IM CA  | IM BKG | IF-BKG | RI%    |
|-----|--------|--------|--------|--------|
| 0   | 42,89  | 20,818 | 22,07  | 53,04  |
| 0   | 66,848 | 19,011 | 47,84  | 114,96 |
| 0   | 65,844 | 22,485 | 43,36  | 104,20 |
| 0   | 58,793 | 21,336 | 37,46  | 90,02  |
| 0   | 58,983 | 18,518 | 40,47  | 97,24  |
| 0   | 62,812 | 18,23  | 44,58  | 107,14 |
| 0   | 42,706 | 14,627 | 28,08  | 67,48  |
| 0   | 64,092 | 9,5    | 54,59  | 131,19 |
| 0   | 68,442 | 11,805 | 56,64  | 136,11 |
| 0   | 57,845 | 9,712  | 48,13  | 115,67 |
| 0   | 57,457 | 8,147  | 49,31  | 118,50 |
| 0   | 57,423 | 12,102 | 45,32  | 108,91 |
| 0   | 49,986 | 20,586 | 29,40  | 70,65  |
| 0   | 49,264 | 15,638 | 33,63  | 80,81  |
| 0   | 61,153 | 12,804 | 48,35  | 116,19 |
| 0   | 55,8   | 14,363 | 41,44  | 99,58  |
| 0   | 65,206 | 20,836 | 44,37  | 106,63 |
| 0   | 65,883 | 14,614 | 51,27  | 123,21 |
| 0   | 69,468 | 16,476 | 52,99  | 127,35 |
| 0   | 67,859 | 14,387 | 53,47  | 128,50 |
| 0   | 51,098 | 18,884 | 32,21  | 77,42  |
| 0   | 51,849 | 23,973 | 27,88  | 66,99  |
| 0   | 63,535 | 20,51  | 43,03  | 103,40 |
| 0   | 44,872 | 19,259 | 25,61  | 61,55  |
| 0   | 58,737 | 21,045 | 37,69  | 90,58  |
| 0   | 64,185 | 21,46  | 42,73  | 102,68 |
| 50  | 35,196 | 5,282  | 29,91  | 71,89  |
| 50  | 40,582 | 8,801  | 31,78  | 76,38  |
| 50  | 52,044 | 11,232 | 40,81  | 98,08  |
| 50  | 47,489 | 16,174 | 31,32  | 75,26  |
| 50  | 55,228 | 12,642 | 42,59  | 102,34 |
| 50  | 44,514 | 15,234 | 29,28  | 70,36  |
| 50  | 57,525 | 16,59  | 40,94  | 98,37  |
| 50  | 59,843 | 20,05  | 39,79  | 95,63  |
| 50  | 62,097 | 13,481 | 48,62  | 116,83 |
| 50  | 63,635 | 17,886 | 45,75  | 109    |

|            |              |               |                |            |    |        |       |       |        |     |        |       |        |        |    |        |       |       |        |     |        |        |        |         |     |        |        |        |         |
|------------|--------------|---------------|----------------|------------|----|--------|-------|-------|--------|-----|--------|-------|--------|--------|----|--------|-------|-------|--------|-----|--------|--------|--------|---------|-----|--------|--------|--------|---------|
| 200        | 0,006        | 2,775         | 0              | 0          | 50 | 8,748  | 0,873 | 7,88  | 65,74  | 100 | 15,156 | 3,218 | 11,938 | 31,801 | 0  | 36,566 | 1,457 | 35,11 | 167,75 | 100 | 39,656 | 12,774 | 26,882 | 110,859 | 200 | 34,663 | 11,364 | 23,299 | 91,265  |
| 200        | 0,224        | 2,973         | 0              | 0          | 50 | 10,187 | 0,872 | 9,32  | 77,76  | 100 | 22,585 | 3,245 | 19,340 | 51,519 | 0  | 8,718  | 3,523 | 5,20  | 24,82  | 100 | 39,116 | 13,067 | 26,049 | 107,423 | 200 | 29,025 | 10,249 | 18,776 | 73,548  |
| 200        | 0,035        | 2,042         | 0              | 0          | 50 | 29,089 | 0,745 | 28,34 | 236,60 | 100 | 10,562 | 3,100 | 7,462  | 19,878 | 0  | 22,297 | 3,136 | 19,16 | 91,55  | 100 | 32,666 | 14,051 | 18,615 | 76,766  | 200 | 33,330 | 13,812 | 19,518 | 76,454  |
| 200        | 0,313        | 2,477         | 0              | 0          | 50 | 10,838 | 0,082 | 10,76 | 89,78  | 100 | 13,625 | 2,485 | 11,140 | 29,675 | 0  | 34,058 | 3,084 | 30,97 | 147,99 | 100 | 35,547 | 14,177 | 21,370 | 88,128  | 200 | 33,282 | 16,794 | 16,488 | 64,585  |
| 200        | 0,003        | 2,165         | 0              | 0          | 50 | 9,811  | 0,759 | 9,05  | 75,56  | 100 | 17,329 | 1,995 | 15,334 | 40,847 | 0  | 6,87   | 2,897 | 3,97  | 18,98  | 100 | 33,221 | 9,665  | 23,556 | 97,143  | 200 | 37,416 | 15,640 | 21,776 | 85,299  |
| 200        | 0,176        | 2,736         | 0              | 0          | 50 | 25,424 | 0,766 | 24,66 | 205,83 | 100 | 20,533 | 3,000 | 17,533 | 46,705 | 0  | 9,191  | 3,16  | 6,03  | 28,82  | 100 | 32,519 | 12,578 | 19,941 | 82,235  | 200 | 39,571 | 17,796 | 21,775 | 85,295  |
| 200        | 0,033        | 2,115         | 0              | 0          | 50 | 11,044 | 0,956 | 10,09 | 84,21  | 100 | 14,164 | 3,158 | 11,006 | 29,318 | 0  | 10,777 | 6,512 | 4,27  | 20,38  | 100 | 35,368 | 11,741 | 23,627 | 97,435  | 200 | 50,288 | 21,418 | 28,870 | 113,087 |
| 200        | 2,359        | 1,956         | 0,403          | 0,666763   | 50 | 16,032 | 0,907 | 15,13 | 126,25 | 100 | 23,852 | 2,602 | 21,250 | 56,607 | 0  | 11,264 | 7,559 | 3,71  | 17,70  | 200 | 34,561 | 23,031 | 11,530 | 47,439  | 200 | 30,180 | 17,993 | 12,817 | 50,206  |
| 400        | 0,062        | 2,269         | 0              | 0          | 50 | 13,914 | 0,758 | 13,16 | 109,82 | 100 | 38,183 | 2,530 | 35,653 | 94,974 | 0  | 14,58  | 4,917 | 9,66  | 46,17  | 200 | 26,455 | 12,008 | 14,447 | 59,578  | 200 | 44,654 | 19,056 | 25,598 | 100,270 |
| 400        | 1,366        | 2,535         | 0              | 0          | 50 | 16,664 | 1,019 | 15,65 | 130,60 | 100 | 33,442 | 2,175 | 31,267 | 83,291 | 0  | 22,105 | 4,168 | 17,94 | 85,70  | 200 | 25,249 | 11,969 | 13,280 | 54,765  | 200 | 34,813 | 21,130 | 13,683 | 53,598  |
| 400        | 0,514        | 2,733         | 0              | 0          | 50 | 11,395 | 0,906 | 10,49 | 87,56  | 100 | 19,976 | 3,290 | 16,686 | 44,449 | 0  | 11,257 | 5,537 | 5,72  | 27,33  | 200 | 24,699 | 14,886 | 9,813  | 40,468  | 200 | 48,547 | 24,482 | 24,065 | 94,265  |
| 400        | 0,626        | 2,086         | 0              | 0          | 50 | 13,037 | 0,949 | 12,09 | 100,90 | 100 | 22,691 | 2,616 | 20,075 | 53,477 | 0  | 35,597 | 3,332 | 32,27 | 154,16 | 200 | 12,858 | 6,663  | 6,195  | 25,548  | 200 | 37,817 | 20,702 | 17,115 | 67,041  |
| 400        | 0,176        | 3,11          | 0              | 0          | 50 | 11,982 | 1,011 | 10,97 | 91,58  | 100 | 18,931 | 2,730 | 16,201 | 43,157 | 0  | 35,706 | 5,28  | 30,43 | 145,37 | 200 | 24,907 | 14,641 | 10,266 | 42,336  | 200 | 46,242 | 26,556 | 19,686 | 77,112  |
| 400        | 0,027        | 3,288         | 0              | 0          | 50 | 17,609 | 1,067 | 16,54 | 138,08 | 100 | 17,501 | 1,278 | 16,223 | 43,216 | 0  | 26,754 | 5,974 | 20,78 | 99,28  | 200 | 14,554 | 9,573  | 4,981  | 20,541  | 200 | 41,113 | 22,802 | 18,311 | 71,726  |
| 400        | 1,565        | 2,656         | 0              | 0          | 50 | 28,509 | 1,079 | 27,43 | 228,97 | 100 | 13,676 | 2,658 | 11,018 | 29,350 | 0  | 37,045 | 6,372 | 30,67 | 146,55 | 200 | 19,097 | 11,774 | 7,323  | 30,199  | 200 | 32,841 | 12,222 | 47,875 | 77,112  |
| 400        | 0,97         | 3,024         | 0              | 0          | 50 | 14,704 | 0,949 | 13,76 | 114,82 | 100 | 9,079  | 2,825 | 6,254  | 16,660 | 0  | 12,217 | 1,986 | 10,23 | 48,88  | 200 | 21,510 | 11,969 | 9,541  | 39,346  | 200 | 36,516 | 22,033 | 14,483 | 56,732  |
| 400        | 0,939        | 1,681         | 0              | 0          | 50 | 10,934 | 0,961 | 9,97  | 83,25  | 100 | 10,713 | 2,964 | 7,749  | 20,642 | 0  | 27,479 | 7,37  | 20,11 | 96,08  | 200 | 28,407 | 16,951 | 11,456 | 47,243  | 200 | 47,503 | 22,472 | 25,031 | 98,049  |
| 400        | 1,913        | 3,137         | 0              | 0          | 50 | 13,962 | 1,053 | 12,91 | 107,76 | 200 | 9,442  | 3,970 | 5,472  | 14,577 | 0  | 22,077 | 4,413 | 17,66 | 84,40  | 200 | 21,182 | 9,287  | 11,895 | 49,054  | 200 | 44,983 | 21,392 | 23,591 | 92,409  |
| 400        | 0,514        | 3,167         | 0              | 0          | 50 | 28,094 | 1,355 | 26,74 | 223,20 | 200 | 13,095 | 2,223 | 10,872 | 28,961 | 0  | 17,86  | 3,33  | 14,53 | 69,42  | 200 | 29,839 | 16,667 | 13,172 | 54,320  | 200 | 39,973 | 16,566 | 23,407 | 91,688  |
| 400        | 0,335        | 3,052         | 0              | 0          | 50 | 18,301 | 0,924 | 17,38 | 145,05 | 200 | 9,924  | 2,179 | 7,745  | 20,631 | 0  | 50,111 | 3,274 | 46,84 | 223,78 | 200 | 20,301 | 10,923 | 9,378  | 38,674  | 200 | 35,167 | 15,452 | 19,715 | 77,226  |
| 400        | 0,551        | 3,634         | 0              | 0          | 50 | 12,662 | 0,913 | 11,75 | 98,07  | 200 | 6,562  | 2,101 | 4,461  | 11,883 | 0  | 27,562 | 2,551 | 25,01 | 119,50 | 200 | 19,647 | 10,154 | 9,493  | 39,148  | 200 | 41,412 | 15,443 | 25,969 | 101,724 |
| 400        | 0,101        | 3,479         | 0              | 0          | 50 | 10,622 | 0,897 | 9,73  | 81,18  | 200 | 11,197 | 2,083 | 9,114  | 24,728 | 0  | 17,771 | 3,467 | 14,30 | 68,34  | 200 | 24,007 | 11,252 | 12,755 | 52,600  | 200 | 42,699 | 20,805 | 21,894 | 85,761  |
| 400        | 0,61         | 2,62          | 0              | 0          | 50 | 18,735 | 1,16  | 17,58 | 146,71 | 200 | 12,470 | 1,993 | 10,477 | 27,909 | 0  | 39,926 | 3,64  | 36,29 | 173,37 | 200 | 28,479 | 16,379 | 12,100 | 49,899  | 200 | 48,629 | 20,113 | 28,516 | 111,701 |
| 400        | 1,083        | 3,175         | 0              | 0          | 50 | 26,511 | 2,612 | 23,90 | 199,49 | 200 | 10,102 | 1,982 | 8,120  | 21,630 | 0  | 31,216 | 3,468 | 27,75 | 132,58 | 200 | 25,851 | 9,257  | 16,594 | 68,432  | 200 | 45,571 | 19,390 | 26,181 | 102,554 |
| 400        | 0,819        | 2,905         | 0              | 0          | 50 | 10,322 | 0,937 | 9,39  | 78,34  | 200 | 5,544  | 2,545 | 2,999  | 7,989  | 0  | 25,203 | 3,557 | 21,65 | 103,42 | 400 | 26,524 | 10,429 | 16,095 | 66,374  | 200 | 49,407 | 25,571 | 3,836  | 15,026  |
| 400        | 1,125        | 3,799         | 0              | 0          | 50 | 25,917 | 1,017 | 24,90 | 207,85 | 200 | 6,722  | 2,576 | 4,146  | 11,044 | 0  | 28,188 | 3,093 | 25,10 | 119,90 | 400 | 18,581 | 6,190  | 12,391 | 51,099  | 400 | 40,203 | 13,317 | 7,086  | 27,757  |
| 400        | 0,925        | 2,934         | 0              | 0          | 50 | 13,395 | 1,03  | 12,37 | 103,22 | 200 | 8,262  | 2,295 | 5,967  | 15,895 | 0  | 24,363 | 3,264 | 21,10 | 108,81 | 400 | 19,570 | 10,149 | 9,421  | 38,851  | 400 | 23,238 | 21,242 | 1,996  | 7,819   |
|            |              |               |                |            | 50 | 26,949 | 1,239 | 25,71 | 214,61 | 200 | 7,672  | 2,658 | 5,014  | 13,357 | 0  | 34,563 | 3,893 | 30,67 | 146,54 | 400 | 17,292 | 7,152  | 10,140 | 41,816  | 400 | 17,729 | 11,904 | 5,825  | 22,817  |
| <b>Man</b> | <b>IM CA</b> | <b>IM BKG</b> | <b>INT-BKG</b> | <b>RI%</b> | 50 | 11,192 | 1,392 | 9,80  | 81,80  | 200 | 5,927  | 2,566 | 3,361  | 8,953  | 0  | 36,76  | 3,89  | 32,87 | 157,05 | 400 | 20,692 | 9,352  | 11,340 | 46,765  | 400 | 28,449 | 19,921 | 8,528  | 33,405  |
| 0          | 66,131       | 5,692         | 60,439         | 99,99628   | 50 | 10,751 | 0,982 | 9,77  | 81,55  | 200 | 7,965  | 2,701 | 5,264  | 14,022 | 0  | 25,377 | 2,272 | 23,11 | 110,39 | 400 | 21,663 | 9,312  | 12,351 | 50,934  | 400 | 16,938 | 15,880 | 1,058  | 4,144   |
| 0          | 60,83        | 8,418         | 52,412         | 86,71561   | 50 | 8,393  | 0,725 | 7,67  | 64,01  | 200 | 4,604  | 2,565 | 2,039  | 5,432  | 0  | 16,494 | 4,166 | 12,33 | 58,90  | 400 | 17,768 | 4,516  | 13,252 | 54,650  | 400 | 36,182 | 26,107 | 10,075 | 39,465  |
| 0          | 81,087       | 7,581         | 73,506         | 121,6156   | 50 | 16,35  | 0,94  | 15,41 | 128,63 | 200 | 12,795 | 2,554 | 10,241 | 27,280 | 0  | 34,937 | 3,786 | 31,15 | 148,83 | 400 | 20,510 | 8,055  | 12,455 | 51,363  | 400 | 34,808 | 19,960 | 14,848 | 58,161  |
| 0          | 62,966       | 7,542         | 55,424         | 91,69896   | 50 | 8,919  | 1,052 | 7,87  | 65,67  | 200 | 4,920  | 2,384 | 2,536  | 6,756  | 0  | 15,947 | 2,016 | 13,93 | 66,56  | 400 | 20,347 | 6,102  | 14,245 | 58,745  | 400 | 20,633 | 9,876  | 10,757 | 42,136  |
| 0          | 84,011       | 8,788         | 75,223         | 124,4564   | 50 | 8,718  | 0,668 | 8,05  | 67,20  | 200 | 4,082  | 2,423 | 1,659  | 4,419  | 50 | 44,056 | 5,601 | 38,46 | 183,73 | 400 | 15,979 | 7,952  | 8,027  | 33,103  | 400 | 30,879 | 17,344 | 13,535 | 53,018  |
| 0          | 66,32        | 7,485         | 58,835         | 97,34246   | 50 | 5,976  | 1,073 | 4,90  | 40,93  | 200 | 6,953  | 3,037 | 3,916  | 10,432 | 50 | 23,769 | 7,055 | 16,71 | 79,86  | 400 | 16,793 | 9,745  | 7,048  | 29,065  | 400 | 31,285 | 19,967 | 11,318 | 44,334  |
| 0          | 78,131       | 10,086        | 68,045         | 112,5804   | 50 | 13,932 | 0,856 | 13,08 | 109,15 | 200 | 5,066  | 2,200 | 2,866  | 7,635  | 50 | 46,364 | 9,217 | 37,15 | 177,48 | 400 | 12,640 | 7,584  | 5,056  | 20,850  | 400 | 42,721 | 18,377 | 24,344 | 95,358  |
| 0          | 70,457       | 4,881         | 65,576         | 108,4954   | 50 | 8,161  | 0,95  | 7,21  | 60,19  | 200 | 5,858  | 1,917 | 3,941  | 10,498 | 50 | 29,222 | 5,853 | 23,37 | 111,65 | 400 | 12,467 | 7,079  | 5,388  | 22,220  | 400 | 33,800 | 16,902 | 16,898 | 66,191  |
| 0          | 79,463       | 9,367         | 70,096         | 115,9738   | 50 | 8,927  | 1,045 | 7,88  | 65,79  | 200 | 4,886  | 1,634 | 3,252  | 8,663  | 50 | 26,315 | 5,923 | 20,39 | 97,43  | 400 | 12,983 | 6,976  | 6,007  | 24,772  | 400 | 30,920 | 16,660 | 14,260 | 55,858  |
| 0          | 59,685       | 5,814         | 53,871         | 89,12953   | 50 | 7,726  | 0,944 | 6,78  | 56,61  | 200 | 1,879  | 1,992 | 0,000  | 0,000  | 50 | 32,416 | 6,835 | 25,58 | 122,22 | 400 | 15,959 | 7,738  | 8,221  | 33,903  | 400 | 24,570 | 16,660 | 17,991 | 70,473  |
| 0          | 61,038       | 7,299         | 53,739         | 88,91113   | 50 | 6,634  | 0,677 | 5,96  | 49,73  | 400 | 1,680  | 2,121 | 0,000  | 0,000  | 50 | 25,453 | 7,018 | 18,44 | 88,08  | 400 | 17,345 | 7,288  | 10,057 | 41,474  | 400 | 23,777 | 10,342 | 13,435 | 52,626  |
| 0          | 71,541       | 8,78          | 62,761         | 103,838    | 50 | 5,773  | 0,885 | 4,89  | 40,80  | 400 | 2,359  | 1,962 | 0,397  | 1,058  | 50 | 23,454 | 4,844 | 18,61 | 88,92  | 400 | 12,477 | 8,558  | 3,919  | 16,162  | 400 | 37,196 | 15,315 | 21,881 | 85,710  |
| 0          | 74,574       | 6,179         | 68,395         | 113,1595   | 50 | 9,357  | 0,953 | 8,40  | 70,15  | 400 | 1,657  | 1,990 | 0,000  | 0,000  | 50 | 34,599 | 4,572 | 30,03 | 143,46 | 400 | 23,262 | 11,992 | 11,270 | 46,476  | 400 | 19,627 | 1      |        |         |

|     |       |       |   |   |     |        |       |       |        |     |        |        |        |         |     |        |        |        |        |     |        |        |        |         |     |        |        |        |        |
|-----|-------|-------|---|---|-----|--------|-------|-------|--------|-----|--------|--------|--------|---------|-----|--------|--------|--------|--------|-----|--------|--------|--------|---------|-----|--------|--------|--------|--------|
| 50  | 0,039 | 3,494 | 0 | 0 | 100 | 9,797  | 0,917 | 8,88  | 74,12  | 0   | 16,367 | 1,922  | 14,445 | 38,479  | 100 | 19,253 | 0,687  | 18,57  | 88,71  | 50  | 19,124 | 6,299  | 12,825 | 52,889  | 800 | 14,193 | 16,512 | 0,000  | 0,000  |
| 50  | 1,003 | 3,288 | 0 | 0 | 100 | 15,178 | 2,083 | 13,10 | 109,31 | 0   | 11,444 | 3,010  | 8,434  | 22,467  | 100 | 30,051 | 1,6    | 28,45  | 135,93 | 50  | 21,186 | 5,547  | 13,639 | 56,246  | 800 | 13,465 | 12,197 | 1,268  | 4,967  |
| 50  | 1,495 | 2,696 | 0 | 0 | 100 | 8,924  | 0,948 | 7,98  | 66,58  | 0   | 37,952 | 2,610  | 35,342 | 94,146  | 100 | 29,518 | 3,475  | 26,04  | 124,43 | 50  | 21,456 | 5,878  | 15,578 | 64,242  | 800 | 12,957 | 17,258 | 0,000  | 0,000  |
| 50  | 1,054 | 2,93  | 0 | 0 | 100 | 7,564  | 1,115 | 6,45  | 53,83  | 0   | 51,358 | 2,043  | 49,315 | 131,368 | 100 | 28,115 | 2,032  | 26,08  | 124,62 | 50  | 13,518 | 6,372  | 7,146  | 29,469  | 800 | 16,457 | 8,046  | 8,411  | 32,947 |
| 50  | 2,02  | 3,328 | 0 | 0 | 100 | 13,869 | 1,031 | 12,84 | 107,16 | 0   | 55,903 | 2,178  | 53,725 | 143,115 | 100 | 21,156 | 2,693  | 18,46  | 88,21  | 50  | 21,614 | 9,956  | 11,658 | 48,076  | 800 | 13,690 | 13,276 | 0,414  | 1,622  |
| 50  | 2,408 | 3,443 | 0 | 0 | 100 | 18,304 | 1,337 | 16,97 | 141,63 | 0   | 47,875 | 2,763  | 45,112 | 120,171 | 100 | 26,795 | 1,766  | 25,03  | 119,58 | 50  | 24,532 | 14,459 | 10,073 | 41,540  | 800 | 12,000 | 8,862  | 3,138  | 12,292 |
| 50  | 0,558 | 3,714 | 0 | 0 | 100 | 13,7   | 1,814 | 11,89 | 99,22  | 0   | 15,278 | 2,382  | 12,896 | 34,353  | 100 | 31,789 | 2,812  | 28,98  | 138,45 | 50  | 42,827 | 11,896 | 30,931 | 127,556 | 800 | 11,040 | 17,905 | 0,000  | 0,000  |
| 100 | 0,786 | 2,444 | 0 | 0 | 100 | 6,913  | 1,366 | 5,55  | 46,30  | 50  | 26,034 | 2,387  | 23,647 | 62,992  | 100 | 7,226  | 2,566  | 4,66   | 22,26  | 50  | 44,041 | 14,324 | 29,717 | 122,550 | 800 | 11,712 | 11,151 | 0,561  | 2,198  |
| 100 | 0,677 | 2,484 | 0 | 0 | 100 | 7,984  | 1,227 | 6,76  | 56,40  | 50  | 21,153 | 3,440  | 17,713 | 47,185  | 100 | 18,526 | 2,038  | 16,49  | 78,78  | 50  | 26,426 | 14,160 | 12,266 | 50,584  | 800 | 13,759 | 15,636 | 0,000  | 0,000  |
| 100 | 0,83  | 1,363 | 0 | 0 | 100 | 20,484 | 1,629 | 18,86 | 157,39 | 50  | 54,792 | 3,403  | 51,389 | 136,892 | 100 | 17,338 | 2,038  | 15,30  | 73,10  | 50  | 37,943 | 10,966 | 26,977 | 111,250 | 800 | 13,989 | 10,775 | 3,214  | 12,590 |
| 100 | 0,005 | 2,136 | 0 | 0 | 100 | 19,573 | 1,66  | 17,91 | 149,53 | 50  | 47,506 | 2,877  | 44,629 | 118,885 | 100 | 10,232 | 3,063  | 7,17   | 34,25  | 50  | 62,805 | 22,284 | 40,521 | 167,105 | 800 | 15,420 | 14,988 | 0,432  | 1,692  |
| 100 | 1,003 | 3,445 | 0 | 0 | 100 | 12,987 | 1,499 | 11,49 | 95,89  | 50  | 19,552 | 2,925  | 16,627 | 44,292  | 200 | 15,971 | 2,612  | 13,36  | 63,83  | 50  | 29,553 | 13,538 | 16,015 | 66,044  | 800 | 14,502 | 13,088 | 1,414  | 5,539  |
| 100 | 0,676 | 2,1   | 0 | 0 | 100 | 14,276 | 1,644 | 12,63 | 105,44 | 50  | 37,420 | 2,985  | 34,435 | 91,730  | 200 | 17,796 | 2,109  | 15,69  | 74,95  | 50  | 64,031 | 21,722 | 42,309 | 174,478 | 800 | 10,887 | 5,860  | 5,027  | 19,691 |
| 100 | 0,396 | 1,755 | 0 | 0 | 100 | 20,379 | 1,691 | 18,69 | 156,00 | 50  | 27,706 | 2,578  | 25,128 | 66,937  | 200 | 12,304 | 1,883  | 10,42  | 49,79  | 50  | 35,423 | 15,213 | 20,210 | 83,344  | 800 | 14,431 | 12,022 | 2,409  | 9,436  |
| 100 | 0,589 | 1,882 | 0 | 0 | 100 | 11,459 | 1,282 | 10,18 | 84,95  | 50  | 43,611 | 2,094  | 41,517 | 110,595 | 200 | 5,051  | 1,993  | 3,06   | 14,61  | 50  | 45,802 | 19,771 | 26,031 | 107,349 | 800 | 18,995 | 13,377 | 5,618  | 22,006 |
| 100 | 1,113 | 2,501 | 0 | 0 | 100 | 18,755 | 1,423 | 17,33 | 144,68 | 50  | 37,053 | 2,190  | 34,863 | 92,870  | 200 | 3,709  | 1,75   | 1,96   | 9,36   | 50  | 37,030 | 16,288 | 20,742 | 85,538  | 800 | 10,771 | 6,173  | 4,598  | 18,011 |
| 100 | 0,943 | 2,923 | 0 | 0 | 100 | 9,86   | 1,877 | 7,98  | 66,64  | 50  | 39,508 | 2,741  | 36,767 | 97,942  | 200 | 2,889  | 1,797  | 1,09   | 5,22   | 50  | 43,877 | 21,221 | 22,656 | 93,431  | 800 | 18,914 | 13,053 | 5,861  | 22,958 |
| 100 | 1,074 | 3,059 | 0 | 0 | 100 | 8,53   | 1,64  | 6,89  | 57,51  | 50  | 39,730 | 2,757  | 36,973 | 98,490  | 200 | 25,179 | 2,502  | 22,68  | 108,35 | 50  | 46,822 | 7,476  | 39,346 | 162,259 | 800 | 11,878 | 8,104  | 3,774  | 14,783 |
| 100 | 0,037 | 3,04  | 0 | 0 | 100 | 15,698 | 1,948 | 13,75 | 114,78 | 50  | 40,870 | 2,991  | 37,879 | 100,904 | 200 | 3,216  | 2,675  | 0,54   | 2,58   | 50  | 45,091 | 7,771  | 37,320 | 153,904 | 800 | 18,330 | 11,853 | 6,477  | 25,371 |
| 100 | 1,002 | 1,814 | 0 | 0 | 100 | 6,334  | 1,726 | 4,61  | 38,46  | 50  | 18,773 | 2,211  | 16,562 | 44,119  | 200 | 18,205 | 3,42   | 14,79  | 70,64  | 50  | 31,081 | 11,191 | 19,890 | 82,024  | 800 | 9,588  | 8,158  | 1,430  | 5,601  |
| 100 | 0,998 | 1,74  | 0 | 0 | 100 | 13,817 | 1,778 | 12,04 | 100,49 | 50  | 47,999 | 3,430  | 44,569 | 118,725 | 200 | 7,978  | 1,107  | 6,87   | 32,83  | 50  | 32,491 | 11,108 | 21,383 | 88,181  | 800 | 12,372 | 15,138 | 0,000  | 0,000  |
| 100 | 0,837 | 2,916 | 0 | 0 | 100 | 12,622 | 1,995 | 10,63 | 88,71  | 50  | 40,188 | 2,672  | 37,516 | 99,937  | 200 | 7,953  | 1,963  | 5,99   | 28,62  | 50  | 27,484 | 8,596  | 18,888 | 77,892  | 800 | 16,586 | 11,287 | 5,299  | 20,757 |
| 100 | 1,127 | 1,578 | 0 | 0 | 200 | 20,466 | 0,916 | 19,55 | 163,19 | 50  | 29,056 | 2,986  | 26,070 | 69,446  | 200 | 4,012  | 1,937  | 2,08   | 9,91   | 50  | 30,569 | 8,593  | 21,976 | 90,627  | 800 | 17,284 | 8,483  | 8,801  | 34,475 |
| 100 | 0,931 | 2,853 | 0 | 0 | 200 | 19,906 | 0,905 | 19,00 | 158,61 | 50  | 21,593 | 2,918  | 18,675 | 49,747  | 200 | 2,229  | 1,787  | 0,44   | 2,11   | 100 | 32,112 | 12,927 | 19,185 | 79,117  | 800 | 15,319 | 10,201 | 5,118  | 20,048 |
| 200 | 0,539 | 2,126 | 0 | 0 | 200 | 13,007 | 0,899 | 12,11 | 101,07 | 50  | 27,264 | 2,537  | 24,727 | 65,869  | 200 | 2,586  | 3,346  | 0,00   | 0,00   | 100 | 37,806 | 10,794 | 27,012 | 111,395 | 800 | 10,963 | 12,019 | 0,000  | 0,000  |
| 200 | 0,576 | 2,945 | 0 | 0 | 200 | 10,082 | 1,349 | 8,73  | 72,90  | 50  | 8,560  | 2,879  | 5,681  | 55,732  | 200 | 3,362  | 2,834  | 0,53   | 2,52   | 100 | 28,125 | 13,284 | 14,841 | 61,203  | 800 | 14,044 | 10,264 | 3,780  | 14,807 |
| 200 | 1,17  | 2,347 | 0 | 0 | 200 | 16,833 | 0,873 | 15,96 | 133,22 | 50  | 24,268 | 2,573  | 21,695 | 57,193  | 200 | 9,129  | 2,346  | 7,68   | 32,41  | 100 | 29,696 | 10,348 | 19,348 | 79,789  | 800 | 9,198  | 9,687  | 0,000  | 0,000  |
| 200 | 0,539 | 2,807 | 0 | 0 | 200 | 12,558 | 0,857 | 11,70 | 97,67  | 50  | 33,394 | 2,825  | 30,569 | 81,431  | 400 | 3,035  | 1,901  | 1,13   | 5,42   | 100 | 20,132 | 11,000 | 9,132  | 37,659  | 800 | 11,970 | 6,269  | 5,701  | 22,331 |
| 200 | 0,216 | 2,55  | 0 | 0 | 200 | 9,779  | 1,109 | 8,67  | 72,37  | 50  | 13,605 | 2,102  | 11,503 | 30,642  | 400 | 4,4    | 1,823  | 2,58   | 12,31  | 100 | 27,823 | 10,056 | 17,767 | 73,269  | 800 | 16,469 | 9,415  | 7,054  | 27,631 |
| 200 | 0,993 | 3,013 | 0 | 0 | 200 | 9,101  | 1,087 | 8,01  | 66,90  | 50  | 27,619 | 2,210  | 25,409 | 67,686  | 400 | 2,946  | 2,435  | 0,51   | 2,44   | 100 | 32,716 | 11,820 | 20,896 | 86,173  | 800 | 19,643 | 9,140  | 10,503 | 41,141 |
| 200 | 1,059 | 2,806 | 0 | 0 | 200 | 24,574 | 0,977 | 23,60 | 196,97 | 50  | 19,076 | 2,932  | 16,144 | 43,005  | 400 | 1,516  | 3,261  | 0,01   | 0,00   | 100 | 11,959 | 10,678 | 1,281  | 5,283   | 800 | 14,088 | 9,925  | 4,163  | 16,307 |
| 200 | 0,571 | 3,236 | 0 | 0 | 200 | 27,702 | 0,988 | 26,71 | 222,99 | 50  | 20,659 | 2,848  | 17,811 | 47,446  | 400 | 4,098  | 2,085  | 2,00   | 9,62   | 100 | 18,860 | 9,885  | 8,975  | 37,012  | 800 | 16,366 | 8,964  | 7,402  | 28,995 |
| 200 | 1,041 | 1,965 | 0 | 0 | 200 | 6,052  | 1,032 | 5,02  | 41,90  | 50  | 34,674 | 2,318  | 32,356 | 86,191  | 400 | 4,169  | 2,926  | 1,24   | 5,94   | 100 | 31,285 | 8,256  | 23,029 | 94,969  | 800 | 16,855 | 10,146 | 6,709  | 26,280 |
| 200 | 0,048 | 2,308 | 0 | 0 | 200 | 11,891 | 0,942 | 10,95 | 91,40  | 50  | 11,878 | 2,328  | 9,550  | 25,440  | 400 | 3,345  | 2,297  | 1,05   | 5,01   | 100 | 21,615 | 8,347  | 13,268 | 54,716  | 800 | 14,803 | 7,648  | 7,155  | 28,027 |
| 200 | 0,12  | 1,375 | 0 | 0 | 200 | 10,936 | 1,012 | 9,92  | 82,84  | 50  | 7,001  | 2,771  | 4,230  | 11,268  | 400 | 1,869  | 3,04   | 0,00   | 0,00   | 200 | 26,719 | 10,725 | 15,994 | 65,958  | 800 | 11,586 | 9,814  | 1,772  | 6,941  |
| 200 | 0,6   | 2,32  | 0 | 0 | 200 | 16,099 | 1,066 | 15,03 | 125,49 | 50  | 33,162 | 3,000  | 30,162 | 80,347  | 400 | 2,621  | 2,945  | 0,00   | 0,00   | 200 | 24,080 | 12,676 | 11,404 | 47,029  | 800 | 7,366  | 5,121  | 2,245  | 8,794  |
| 200 | 0,045 | 2,377 | 0 | 0 | 200 | 20,517 | 1,04  | 19,48 | 162,58 | 50  | 11,087 | 2,337  | 8,750  | 23,309  | 400 | 2,508  | 2,299  | 0,21   | 1,00   | 200 | 17,395 | 8,571  | 8,824  | 36,389  | 800 | 16,962 | 12,010 | 4,952  | 19,398 |
| 400 | 0     | 1,323 | 0 | 0 | 200 | 12,136 | 1,02  | 11,12 | 92,79  | 100 | 15,573 | 15,462 | 0,111  | 0,296   | 500 | 18,967 | 8,130  | 10,837 | 44,691 | 200 | 17,175 | 7,828  | 9,347  | 38,546  | 800 | 13,563 | 8,525  | 5,038  | 19,734 |
| 400 | 0,042 | 1,186 | 0 | 0 | 200 | 9,141  | 0,995 | 8,15  | 68,00  | 100 | 18,335 | 2,772  | 15,563 | 41,457  | 500 | 17,175 | 7,828  | 9,347  | 38,546 | 200 | 17,175 | 7,828  | 9,347  | 38,546  | 800 | 17,335 | 10,916 | 6,419  | 25,144 |
| 400 | 0,003 | 0,997 | 0 | 0 | 200 | 15,522 | 1,014 | 14,51 | 121,10 | 100 | 14,594 | 2,633  | 11,961 | 31,862  | 500 | 32,174 | 14,890 | 17,284 | 71,277 | 200 | 32,174 | 14,890 | 17,284 | 71,277  | 800 | 13,121 | 8,995  | 4,126  | 16,162 |
| 400 | 0,065 | 0,679 | 0 | 0 | 200 | 14,559 | 1,457 | 13,10 | 109,37 | 100 | 16,142 | 2,603  | 13,539 | 36,066  | 500 | 26,211 | 9,972  | 16,239 | 66,968 | 200 | 26,211 | 9,972  | 16,239 | 66,968  | 800 | 13,962 | 9,837  | 4,125  | 16,162 |
| 400 | 0     | 1,073 | 0 | 0 | 200 | 11,848 | 1,297 | 10,55 | 88,07  | 100 | 14,723 | 2,437  | 12,286 | 32,728  | 500 | 32,299 | 1,05   | 31,25  | 67,36  | 200 | 19,188 | 9,723  | 9,465  | 39,033  | 800 | 14,326 | 8,915  | 5,411  | 21,196 |
| 400 | 0,004 | 1,27  | 0 | 0 | 200 | 15     | 0,546 | 14,45 | 120,65 | 100 | 7,194  | 3,088  | 4,106  | 10,938  | 500 |        |        |        |        |     |        |        |        |         |     |        |        |        |        |

|     |       |       |   |   |     |        |       |       |        |
|-----|-------|-------|---|---|-----|--------|-------|-------|--------|
| 100 | 0,855 | 1,935 | 0 | 0 | 400 | 7,09   | 0,7   | 6,39  | 53,34  |
| 100 | 0,579 | 1,963 | 0 | 0 | 400 | 5,861  | 0,848 | 5,01  | 41,85  |
| 100 | 0,833 | 3,014 | 0 | 0 | 400 | 10,219 | 0,995 | 9,22  | 77,00  |
| 100 | 1     | 3,72  | 0 | 0 | 400 | 14,427 | 1,022 | 13,41 | 111,90 |
| 100 | 1     | 3,85  | 0 | 0 | 400 | 5,398  | 1,002 | 4,40  | 36,70  |
| 200 | 0,006 | 2,925 | 0 | 0 | 400 | 16,804 | 0,608 | 16,20 | 135,19 |
| 200 | 0     | 1,452 | 0 | 0 | 400 | 14,741 | 1,001 | 13,74 | 114,69 |
| 200 | 0     | 1,3   | 0 | 0 | 400 | 29,229 | 0,886 | 28,34 | 236,59 |
| 200 | 0,216 | 2,395 | 0 | 0 | 400 | 11,409 | 0,837 | 10,57 | 88,25  |
| 200 | 0,367 | 3,12  | 0 | 0 | 400 | 6,854  | 0,867 | 5,99  | 49,98  |
| 200 | 0,088 | 1,615 | 0 | 0 | 400 | 12,438 | 0,857 | 11,58 | 96,67  |
| 400 | 1     | 1,868 | 0 | 0 | 400 | 6,849  | 0,75  | 6,10  | 50,91  |
| 400 | 0,803 | 1,045 | 0 | 0 | 400 | 24,131 | 0,998 | 23,13 | 193,10 |
| 400 | 0,221 | 1,567 | 0 | 0 | 400 | 16,804 | 0,77  | 16,03 | 133,84 |
| 400 | 0,176 | 1,926 | 0 | 0 | 400 | 15,141 | 0,867 | 14,27 | 119,15 |
| 400 | 0,271 | 1,584 | 0 | 0 | 400 | 24,964 | 0,653 | 24,31 | 202,93 |
| 400 | 0,242 | 0,819 | 0 | 0 | 400 | 16,043 | 0,894 | 15,15 | 126,45 |
| 400 | 0,422 | 1,574 | 0 | 0 | 400 | 14,607 | 0,941 | 13,67 | 114,08 |
| 400 | 0,11  | 1,97  | 0 | 0 | 400 | 9,35   | 0,948 | 8,40  | 70,13  |
| 400 | 0,946 | 1,169 | 0 | 0 | 400 | 8,14   | 1,152 | 6,99  | 58,33  |
| 400 | 1,024 | 2,386 | 0 | 0 | 400 | 9,603  | 1,067 | 8,54  | 71,25  |

| Gal | IM CA  | IM BKG | INT-BKG | RI%      |
|-----|--------|--------|---------|----------|
| 0   | 18,9   | 6,301  | 12,599  | 61,02097 |
| 0   | 24,977 | 7,978  | 16,999  | 82,33157 |
| 0   | 23,415 | 7,177  | 16,238  | 78,64581 |
| 0   | 23,767 | 5,255  | 18,512  | 89,65951 |
| 0   | 29,3   | 3,87   | 25,43   | 123,1656 |
| 0   | 27,653 | 5,517  | 22,136  | 107,2117 |
| 0   | 28,779 | 4,586  | 24,193  | 117,1744 |
| 0   | 29,748 | 5,912  | 23,836  | 115,4453 |
| 0   | 29,56  | 3,763  | 25,797  | 124,9431 |
| 0   | 31,519 | 5,25   | 26,269  | 127,2291 |
| 0   | 26,651 | 6,252  | 20,399  | 98,79886 |
| 0   | 26,074 | 5,42   | 20,654  | 100,0339 |
| 0   | 18,899 | 4,663  | 14,236  | 68,94948 |
| 0   | 28,69  | 5,339  | 23,351  | 113,0963 |
| 0   | 27,249 | 6,693  | 20,556  | 99,55926 |
| 0   | 27,302 | 7,085  | 20,217  | 97,91737 |
| 0   | 35,133 | 5,629  | 29,504  | 142,8973 |
| 0   | 25,815 | 5,153  | 20,662  | 100,0726 |
| 0   | 23,88  | 4,765  | 19,115  | 92,58004 |
| 0   | 17,367 | 5,13   | 12,237  | 59,26769 |
| 50  | 36,239 | 7,669  | 28,57   | 138,3736 |
| 50  | 37,163 | 7,002  | 30,161  | 146,0793 |
| 50  | 23,629 | 7,7    | 15,929  | 77,14922 |
| 50  | 24,452 | 8,054  | 16,398  | 79,42074 |
| 50  | 33,69  | 9,94   | 23,75   | 115,0288 |
| 50  | 33,684 | 9,77   | 23,914  | 115,8231 |
| 50  | 35,354 | 5,364  | 29,99   | 145,2511 |
| 50  | 38,582 | 5,79   | 32,792  | 158,8221 |
| 50  | 38,402 | 5,893  | 32,509  | 157,4514 |
| 50  | 35,581 | 7,748  | 27,833  | 134,8041 |
| 50  | 38,132 | 6,363  | 31,769  | 153,8674 |
| 50  | 47,536 | 6,259  | 41,277  | 199,9174 |
| 50  | 48,791 | 9,06   | 39,731  | 192,4299 |
| 50  | 42,551 | 6,431  | 36,12   | 174,9407 |
| 50  | 41,618 | 7,202  | 34,416  | 166,6877 |
| 50  | 27,857 | 5,644  | 22,213  | 107,5846 |
| 50  | 23,078 | 8,003  | 15,075  | 73,01303 |
| 50  | 45,997 | 7,78   | 38,217  | 185,0971 |
| 50  | 30,914 | 5,273  | 25,641  | 124,1875 |
| 50  | 15,431 | 5,164  | 10,267  | 49,72635 |
| 50  | 20,447 | 4,562  | 15,885  | 76,93612 |
| 50  | 20,781 | 3,467  | 17,314  | 83,85722 |
| 50  | 19,518 | 5,545  | 13,973  | 67,67569 |
| 50  | 18,101 | 6,774  | 11,327  | 54,86027 |
| 50  | 20,764 | 4,934  | 14,831  | 71,83126 |
| 50  | 15,237 | 4,324  | 10,913  | 52,85514 |
| 50  | 26,449 | 6,124  | 20,325  | 98,44045 |
| 50  | 28,552 | 5,73   | 22,822  | 110,5342 |

| Fru | IM CA | IM BKG | IM-BKG | RI% |
|-----|-------|--------|--------|-----|
|-----|-------|--------|--------|-----|

|     |        |       |        |         |
|-----|--------|-------|--------|---------|
| 0   | 27,530 | 1,611 | 25,919 | 83,135  |
| 0   | 48,973 | 2,793 | 46,180 | 148,122 |
| 0   | 36,648 | 3,151 | 33,497 | 107,441 |
| 0   | 41,238 | 3,978 | 37,260 | 119,511 |
| 0   | 42,574 | 2,819 | 39,755 | 127,514 |
| 0   | 38,813 | 2,718 | 36,095 | 115,774 |
| 0   | 31,945 | 3,170 | 28,775 | 92,295  |
| 0   | 34,684 | 3,195 | 31,489 | 101,001 |
| 0   | 38,382 | 3,325 | 35,057 | 112,445 |
| 0   | 40,198 | 3,914 | 36,284 | 116,380 |
| 0   | 52,811 | 3,940 | 48,871 | 156,753 |
| 0   | 47,066 | 2,905 | 44,161 | 141,646 |
| 0   | 15,141 | 0,867 | 14,27  | 119,15  |
| 0   | 11,173 | 4,005 | 7,168  | 22,991  |
| 0   | 27,635 | 4,080 | 23,555 | 75,552  |
| 0   | 46,070 | 5,284 | 40,786 | 130,821 |
| 0   | 34,659 | 2,953 | 31,706 | 101,697 |
| 0   | 20,124 | 2,145 | 17,979 | 57,667  |
| 0   | 26,636 | 2,322 | 24,314 | 77,987  |
| 50  | 23,899 | 0,923 | 22,976 | 73,695  |
| 50  | 23,982 | 1,154 | 22,828 | 73,221  |
| 50  | 21,297 | 1,142 | 20,155 | 64,647  |
| 50  | 24,352 | 0,884 | 23,468 | 75,273  |
| 50  | 14,035 | 1,035 | 13,000 | 41,697  |
| 50  | 52,698 | 1,272 | 51,426 | 164,948 |
| 50  | 18,085 | 1,660 | 16,425 | 52,683  |
| 100 | 21,159 | 1,036 | 20,123 | 64,544  |
| 100 | 27,782 | 0,965 | 26,817 | 86,015  |
| 100 | 22,342 | 1,036 | 21,306 | 68,339  |
| 100 | 28,181 | 1,208 | 26,973 | 86,516  |
| 100 | 19,526 | 1,167 | 18,359 | 58,886  |
| 100 | 17,400 | 0,802 | 16,598 | 53,238  |
| 200 | 11,353 | 1,137 | 10,216 | 32,768  |
| 200 | 16,725 | 1,252 | 15,473 | 49,629  |
| 200 | 15,785 | 1,260 | 14,525 | 46,589  |
| 200 | 7,665  | 1,205 | 6,460  | 20,720  |
| 200 | 12,267 | 1,034 | 11,233 | 36,030  |
| 400 | 2,780  | 1,743 | 1,037  | 3,326   |
| 400 | 2,854  | 1,554 | 1,300  | 4,170   |
| 400 | 3,906  | 1,335 | 2,571  | 8,246   |
| 400 | 4,938  | 1,989 | 2,949  | 9,459   |
| 400 | 2,147  | 1,771 | 0,376  | 1,206   |
| 400 | 3,622  | 1,306 | 2,316  | 7,429   |
| 400 | 2,667  | 1,980 | 0,687  | 2,204   |

| Gal | IM CA | IM BKG | IM-BKG | RI% |
|-----|-------|--------|--------|-----|
|-----|-------|--------|--------|-----|

|    |        |       |        |         |
|----|--------|-------|--------|---------|
| 0  | 27,530 | 1,611 | 25,919 | 83,135  |
| 0  | 48,973 | 2,793 | 46,180 | 148,122 |
| 0  | 36,648 | 3,151 | 33,497 | 107,441 |
| 0  | 41,238 | 3,978 | 37,260 | 119,511 |
| 0  | 42,574 | 2,819 | 39,755 | 127,514 |
| 0  | 38,813 | 2,718 | 36,095 | 115,774 |
| 0  | 31,945 | 3,170 | 28,775 | 92,295  |
| 0  | 34,684 | 3,195 | 31,489 | 101,001 |
| 0  | 38,382 | 3,325 | 35,057 | 112,445 |
| 0  | 40,198 | 3,914 | 36,284 | 116,380 |
| 0  | 52,811 | 3,940 | 48,871 | 156,753 |
| 0  | 47,066 | 2,905 | 44,161 | 141,646 |
| 0  | 7,532  | 4,019 | 3,513  | 11,268  |
| 0  | 11,173 | 4,005 | 7,168  | 22,991  |
| 0  | 27,635 | 4,080 | 23,555 | 75,552  |
| 0  | 46,070 | 5,284 | 40,786 | 130,821 |
| 0  | 34,659 | 2,953 | 31,706 | 101,697 |
| 0  | 20,124 | 2,145 | 17,979 | 57,667  |
| 0  | 26,636 | 2,322 | 24,314 | 77,987  |
| 50 | 19,757 | 1,198 | 18,559 | 59,528  |
| 50 | 14,652 | 1,699 | 12,953 | 41,547  |
| 50 | 22,071 | 2,278 | 19,793 | 63,486  |
| 50 | 20,658 | 2,950 | 17,708 | 56,798  |

|   |        |       |       |        |
|---|--------|-------|-------|--------|
| 0 | 40,751 | 1,148 | 39,60 | 85,37  |
| 0 | 51,05  | 1,11  | 49,94 | 107,65 |
| 0 | 41,06  | 1,342 | 39,72 | 85,62  |
| 0 | 21,669 | 1,023 | 20,65 | 44,51  |
| 0 | 31,839 | 1,004 | 30,84 | 66,47  |
| 0 | 43,552 | 2,123 | 41,43 | 89,31  |
| 0 | 44,039 | 1,03  | 43,01 | 92,71  |
| 0 | 38,387 | 1,178 | 37,21 | 80,21  |
| 0 | 28,168 | 1,174 | 26,99 | 58,19  |
| 0 | 31,92  | 1,047 | 30,87 | 66,55  |
| 0 | 35,317 | 1,231 | 34,09 | 73,48  |
| 0 | 57,423 | 1,019 | 56,40 | 121,59 |
| 0 | 47,749 | 1,035 | 46,71 | 100,70 |
| 0 | 65,686 | 1,491 | 64,20 | 138,38 |
| 0 | 26,187 | 1     | 25,19 | 54,29  |
| 0 | 31,42  | 0,995 | 30,43 | 65,58  |
| 0 | 36,989 | 1,653 | 35,34 | 76,17  |
| 0 | 44,031 | 1,444 | 42,59 | 91,84  |
| 0 | 68,65  | 1,433 | 67,22 | 144,89 |
| 0 | 57,759 | 1,716 | 56,04 | 120,81 |
| 0 | 48,323 | 1,983 | 46,34 | 99,89  |
| 0 | 46,893 | 2,587 | 44,31 | 95,51  |
| 0 | 71,171 | 2,079 | 69,09 | 148,94 |
| 0 | 62,083 | 2,266 | 59,82 | 128,94 |
| 0 | 49,446 | 2,093 | 47,35 | 102,94 |
| 0 | 59,679 | 1,483 | 58,20 | 125,45 |
| 0 | 49,238 | 2,201 | 47,04 | 101,29 |
| 0 | 57,101 | 2,157 | 54,94 | 118,44 |
| 0 | 59,581 | 1,873 | 57,71 | 124,40 |
| 0 | 27,34  | 1,568 | 25,77 | 55,55  |
| 0 | 54,808 | 1,957 | 52,85 | 113,93 |
| 0 | 38,599 | 1,822 | 36,78 | 79,28  |
| 0 | 56,859 | 1,11  | 55,75 | 120,17 |
| 0 | 74,336 | 4,894 | 69,44 | 149,69 |
| 0 | 53,369 | 1,547 | 51,82 | 111,71 |
| 0 | 52,894 | 1,907 | 50,99 | 109,91 |
| 0 | 33,482 | 1,674 | 31,81 | 68,57  |
| 0 | 70,702 | 2,45  | 68,25 | 147,13 |
| 0 | 61,903 | 1,371 | 60,53 | 130,48 |
| 0 | 55,466 | 1,278 | 54,19 | 116,81 |
| 0 | 57,421 | 1,791 | 55,63 | 119,92 |
| 0 | 68,262 | 1,952 | 66,31 | 142,94 |
| 0 | 33,501 | 2,495 | 31,01 | 66,84  |
| 0 | 27,896 | 1,5   | 26,40 | 56,90  |
| 0 | 52,648 | 1,082 | 51,57 | 111,16 |
| 0 | 31,399 | 1,497 | 29,90 | 64,46  |
| 0 | 64,66  | 0,968 | 63,69 | 137,30 |

|    |        |       |       |        |
|----|--------|-------|-------|--------|
| 50 | 19,994 | 0,791 | 19,20 | 41,39  |
| 50 | 16,966 | 1,679 | 15,29 | 32,95  |
| 50 | 14,835 | 1,486 | 13,35 | 28,78  |
| 50 | 24,819 | 0,488 | 24,33 | 52,45  |
| 50 | 26,468 | 1,183 | 25,29 | 54,51  |
| 50 | 11,877 | 2,074 | 9,80  | 21,13  |
| 50 | 20,838 | 1,672 | 19,17 | 41,31  |
| 50 | 34,813 | 1,512 | 33,30 | 71,78  |
| 50 | 28,659 | 1,638 | 27,02 | 58,25  |
| 50 | 14,843 | 1,82  | 13,02 | 28,07  |
| 50 | 13,205 | 2,948 | 10,26 | 22,11  |
| 50 | 19,901 | 2,871 | 17,03 | 36,71  |
| 50 | 12,116 | 3,134 | 8,98  | 19,36  |
| 50 | 6,842  | 2,519 | 4,32  | 9,32   |
| 50 | 6,577  | 2,273 | 4,30  | 9,28   |
| 50 | 20,687 | 1,536 | 19,15 | 41,28  |
| 50 | 36,851 | 2,344 | 34,51 | 74,38  |
| 50 | 24,894 | 2,899 | 22,00 | 47,41  |
| 50 | 42,254 | 1,708 | 40,55 | 87,40  |
| 50 | 41,349 | 1,276 | 40,07 | 86,38  |
| 50 | 12,762 | 1,951 | 10,81 | 23,30  |
| 50 | 30,238 | 2,715 | 27,52 | 59,33  |
| 50 | 46,698 | 3,731 | 42,97 | 92,62  |
| 50 | 53,813 | 2,367 | 51,45 | 110,90 |

| Glc | RI | BKG | RI-BKG | RI% |
|-----|----|-----|--------|-----|
|-----|----|-----|--------|-----|

|   |        |       |        |         |
|---|--------|-------|--------|---------|
| 0 | 12,001 | 4,397 | 7,604  | 128,450 |
| 0 | 14,977 | 3,007 | 11,970 | 202,202 |
| 0 | 13,404 | 2,842 | 10,562 | 178,417 |
| 0 | 9,149  | 3,229 | 5,920  | 100,003 |
| 0 | 11,472 | 4,955 | 6,517  | 110,088 |
| 0 | 11,219 | 4,022 | 7,197  | 121,574 |
| 0 | 7,439  | 6,311 | 1,128  | 19,055  |
| 0 | 13,475 | 4,436 | 9,039  | 152,690 |
| 0 | 11,883 | 4,256 | 7,627  | 128,838 |
| 0 | 10,272 | 4,445 | 5,827  | 98,432  |
| 0 | 11,599 | 3,638 | 7,961  | 134,480 |
| 0 | 11,272 | 2,822 | 8,450  | 142,741 |
| 0 | 7,599  | 3,401 | 4,198  | 70,914  |
| 0 | 9,404  | 3,600 | 5,804  | 98,043  |
| 0 | 11,910 | 4,217 | 7,693  | 129,953 |
| 0 | 19,761 | 5,489 | 14,272 | 241,088 |
| 0 | 17,384 | 4,551 | 12,833 | 216,780 |
| 0 | 16,511 | 6,115 | 10,396 | 175,613 |
| 0 | 11,892 | 4,407 | 7,485  | 126,439 |
| 0 | 5,816  | 3,465 | 2,351  | 39,714  |
| 0 | 13,606 | 4,018 | 9,588  | 161,964 |
| 0 | 7,697  | 2,745 | 4,952  | 83,651  |
| 0 | 5,439  | 3,267 | 2,172  | 36,690  |
| 0 | 4,918  | 3,228 | 1,690  | 28,548  |
| 0 | 4,075  | 2,826 | 1,249  | 21,099  |
| 0 | 4,917  | 2,750 | 1,727  | 29,173  |

|     |        |        |        |          |     |        |       |       |        |     |        |       |        |        |     |        |       |       |       |    |        |        |        |         |     |        |        |       |        |
|-----|--------|--------|--------|----------|-----|--------|-------|-------|--------|-----|--------|-------|--------|--------|-----|--------|-------|-------|-------|----|--------|--------|--------|---------|-----|--------|--------|-------|--------|
| 50  | 25,905 | 5,383  | 20,522 | 99,39459 | 800 | 13,523 | 1,097 | 12,43 | 103,72 | 50  | 25,250 | 2,004 | 23,246 | 74,561 | 50  | 18,336 | 3,107 | 15,23 | 32,83 | 0  | 4,993  | 2,659  | 2,334  | 39,427  | 400 | 10,614 | 5,680  | 4,934 | 49,874 |
| 50  | 27,23  | 8,067  | 19,163 | 92,81252 | 800 | 21,087 | 1,009 | 20,08 | 167,60 | 50  | 28,903 | 2,106 | 26,797 | 85,951 | 50  | 33,708 | 2,312 | 31,40 | 67,68 | 0  | 7,370  | 3,412  | 3,958  | 66,860  | 400 | 14,304 | 6,143  | 8,161 | 82,494 |
| 50  | 23,546 | 7,229  | 16,317 | 97,02843 | 800 | 14,366 | 1,09  | 13,28 | 110,82 | 50  | 25,923 | 1,722 | 24,201 | 77,624 | 50  | 31,799 | 2,266 | 29,53 | 63,66 | 0  | 6,597  | 4,004  | 2,593  | 43,802  | 400 | 16,025 | 6,692  | 9,333 | 94,341 |
| 50  | 28,453 | 8,257  | 20,196 | 97,81566 | 800 | 24,996 | 1,063 | 23,93 | 199,78 | 50  | 23,332 | 1,445 | 21,887 | 70,202 | 100 | 16,97  | 5,737 | 11,23 | 24,21 | 0  | 9,215  | 3,693  | 5,522  | 93,280  | 400 | 14,434 | 8,208  | 6,226 | 62,934 |
| 50  | 22,189 | 6,693  | 15,496 | 75,05207 | 800 | 10,799 | 1,229 | 9,57  | 79,88  | 100 | 12,775 | 1,343 | 11,432 | 36,668 | 100 | 13,699 | 5,882 | 7,82  | 16,85 | 0  | 13,530 | 4,658  | 8,872  | 149,869 | 400 | 19,362 | 9,694  | 9,668 | 97,727 |
| 100 | 40,579 | 8,947  | 31,632 | 153,2039 | 800 | 21,428 | 1,011 | 20,42 | 170,43 | 100 | 12,303 | 1,327 | 10,976 | 35,205 | 100 | 17,592 | 4,764 | 12,83 | 27,65 | 0  | 10,342 | 4,099  | 6,243  | 105,459 | 400 | 13,243 | 8,644  | 4,599 | 46,488 |
| 100 | 37,912 | 6,542  | 31,37  | 151,9349 | 800 | 7,571  | 1,003 | 6,57  | 54,83  | 100 | 19,098 | 1,455 | 17,643 | 56,590 | 100 | 8,348  | 5,165 | 3,18  | 6,86  | 0  | 8,511  | 3,153  | 5,358  | 90,509  | 400 | 12,305 | 7,412  | 4,893 | 49,460 |
| 100 | 19,359 | 8,339  | 11,02  | 53,37337 | 800 | 25,836 | 1,119 | 24,72 | 206,32 | 100 | 14,821 | 1,919 | 12,902 | 41,383 | 100 | 24,249 | 3,149 | 21,10 | 45,48 | 0  | 10,214 | 3,549  | 6,665  | 112,588 | 400 | 14,146 | 9,010  | 5,136 | 91,916 |
| 100 | 31,063 | 5,868  | 25,195 | 122,0274 | 800 | 17,215 | 1,115 | 16,10 | 134,39 | 100 | 19,221 | 2,328 | 16,893 | 54,184 | 100 | 18,813 | 1,95  | 16,86 | 36,35 | 0  | 7,646  | 3,173  | 4,473  | 75,560  | 800 | 14,086 | 13,320 | 0,766 | 7,743  |
| 100 | 35,706 | 11,086 | 24,62  | 119,2425 | 800 | 13,495 | 1,122 | 12,37 | 103,28 | 100 | 19,905 | 2,014 | 17,891 | 57,385 | 100 | 24,43  | 2,394 | 22,04 | 47,50 | 0  | 16,707 | 3,135  | 13,572 | 229,263 | 800 | 11,900 | 13,126 | 0,000 | 0,000  |
| 100 | 27,549 | 9,183  | 18,366 | 88,95239 | 800 | 20,037 | 1,035 | 19,00 | 158,62 | 100 | 16,221 | 2,064 | 14,157 | 45,408 | 100 | 22,04  | 2,039 | 20,00 | 43,11 | 0  | 14,734 | 10,453 | 4,281  | 72,316  | 800 | 13,381 | 12,885 | 0,496 | 5,014  |
| 100 | 28,443 | 21,004 | 7,439  | 36,02945 | 800 | 16,062 | 1,145 | 14,92 | 124,52 | 100 | 11,967 | 2,643 | 9,324  | 29,907 | 100 | 12,61  | 2,4   | 10,21 | 22,01 | 0  | 16,876 | 5,440  | 11,436 | 193,181 | 800 | 9,558  | 14,917 | 0,000 | 0,000  |
| 100 | 36,784 | 7,294  | 29,49  | 142,8295 | 800 | 24,25  | 0,974 | 23,28 | 194,29 | 100 | 16,110 | 2,410 | 13,700 | 43,943 | 100 | 10,307 | 3,139 | 7,17  | 15,45 | 0  | 12,109 | 3,587  | 8,522  | 143,957 | 800 | 11,208 | 11,620 | 0,000 | 0,000  |
| 100 | 24,127 | 7,798  | 16,329 | 79,08655 | 800 | 20,841 | 0,726 | 20,12 | 167,91 | 100 | 17,986 | 1,858 | 16,128 | 51,730 | 100 | 7,658  | 3,222 | 4,44  | 9,56  | 0  | 8,672  | 4,423  | 4,249  | 71,776  | 800 | 8,327  | 10,821 | 0,000 | 0,000  |
| 100 | 30,981 | 20,147 | 10,834 | 52,47251 | 800 | 14,665 | 1,296 | 13,37 | 111,60 | 100 | 16,909 | 1,582 | 15,327 | 49,161 | 100 | 13,571 | 3,956 | 9,62  | 20,73 | 0  | 8,475  | 4,081  | 4,394  | 74,225  | 800 | 12,749 | 8,960  | 3,789 | 38,300 |
| 100 | 46,422 | 4,111  | 42,311 | 204,9257 | 800 | 8,079  | 1,266 | 6,81  | 56,87  | 100 | 10,138 | 1,318 | 8,820  | 28,290 | 100 | 13,176 | 3,372 | 9,80  | 21,13 | 0  | 6,461  | 4,773  | 1,688  | 28,514  | 800 | 11,390 | 13,923 | 0,000 | 0,000  |
| 100 | 39,82  | 5,268  | 34,552 | 167,3463 | 800 | 20,529 | 1,005 | 19,52 | 162,97 | 200 | 0,832  | 1,120 | 0,000  | 0,000  | 100 | 22,912 | 3,37  | 19,54 | 42,13 | 0  | 6,097  | 4,506  | 1,591  | 26,876  | 800 | 13,002 | 12,385 | 0,617 | 6,237  |
| 200 | 41,755 | 6,169  | 35,586 | 172,3543 | 800 | 15,963 | 0,902 | 15,06 | 125,72 | 200 | 1,030  | 1,287 | 0,000  | 0,000  | 100 | 8,946  | 3,573 | 5,37  | 11,58 | 0  | 9,965  | 5,307  | 4,658  | 78,685  | 800 | 16,131 | 11,943 | 4,188 | 42,334 |
| 200 | 37,623 | 6,709  | 30,914 | 149,7264 | 800 | 8,374  | 1,191 | 7,18  | 59,96  | 200 | 1,288  | 1,089 | 0,199  | 0,638  | 100 | 10,606 | 3,314 | 7,29  | 15,72 | 0  | 6,705  | 4,760  | 1,945  | 32,856  | 800 | 15,072 | 12,341 | 2,731 | 27,606 |
| 200 | 26,177 | 6,942  | 19,235 | 93,16123 | 800 | 9,982  | 1,331 | 8,65  | 72,91  | 200 | 0,669  | 1,259 | 0,000  | 0,000  | 100 | 16,676 | 3,587 | 2,578 | 14,10 | 0  | 7,373  | 4,383  | 2,990  | 50,508  | 800 | 12,059 | 17,424 | 0,000 | 0,000  |
| 200 | 41,642 | 5,959  | 35,683 | 172,8241 | 800 | 7,649  | 1,093 | 6,56  | 54,73  | 200 | 1,074  | 1,721 | 0,000  | 0,000  | 100 | 21,279 | 3,293 | 17,99 | 38,77 | 0  | 9,084  | 5,840  | 3,244  | 54,799  | 800 | 14,185 | 15,136 | 0,000 | 0,000  |
| 200 | 36,005 | 5,854  | 30,151 | 146,0309 | 800 | 10,459 | 0,999 | 9,46  | 78,97  | 200 | 0,925  | 1,374 | 0,000  | 0,000  | 100 | 25,653 | 3,794 | 21,86 | 47,12 | 0  | 9,037  | 6,389  | 2,648  | 44,731  | 800 | 16,558 | 12,142 | 4,416 | 44,638 |
| 200 | 33,452 | 4,42   | 29,032 | 140,6112 | 200 | 0,878  | 1,117 | 0,000 | 0,000  | 200 | 1,038  | 1,477 | 0,000  | 0,000  | 100 | 31,322 | 2,142 | 29,18 | 62,90 | 0  | 21,924 | 9,830  | 12,094 | 204,296 | 800 | 15,373 | 15,605 | 0,000 | 0,000  |
| 200 | 24,776 | 6,949  | 17,827 | 86,34184 | 200 | 1,038  | 1,477 | 0,000 | 0,000  | 200 | 0,454  | 1,241 | 0,000  | 0,000  | 100 | 10,778 | 3,768 | 7,01  | 15,11 | 0  | 9,093  | 5,126  | 3,967  | 67,012  | 800 | 15,039 | 12,401 | 2,638 | 26,666 |
| 200 | 29,685 | 5,663  | 24,022 | 116,3462 | 200 | 0,874  | 1,268 | 0,000 | 0,000  | 200 | 1,379  | 0,929 | 0,450  | 1,443  | 100 | 38,689 | 3,5   | 35,19 | 75,85 | 0  | 8,623  | 4,563  | 4,060  | 68,583  | 800 | 12,554 | 7,855  | 4,699 | 47,499 |
| 200 | 28,938 | 6,149  | 22,789 | 110,3744 | 200 | 1,495  | 1,193 | 0,302 | 0,969  | 100 | 0,874  | 1,268 | 0,000  | 0,000  | 100 | 38,197 | 2,837 | 35,36 | 76,22 | 0  | 8,054  | 4,422  | 3,632  | 61,353  | 800 | 10,705 | 5,253  | 5,452 | 55,111 |
| 200 | 18,434 | 6,558  | 11,876 | 57,51925 | 200 | 1,139  | 1,841 | 0,000 | 0,000  | 100 | 1,495  | 1,193 | 0,302  | 0,969  | 100 | 35,577 | 2,747 | 32,83 | 70,77 | 0  | 7,123  | 4,573  | 2,550  | 43,076  | 800 | 10,496 | 6,734  | 3,762 | 38,028 |
| 400 | 30,234 | 5,538  | 24,696 | 119,6106 | 200 | 1,139  | 1,841 | 0,000 | 0,000  | 100 | 15,885 | 2,547 | 13,34  | 28,75  | 50  | 15,885 | 2,547 | 13,34 | 28,75 | 50 | 4,857  | 8,226  | 0,000  | 0,000   | 800 | 13,329 | 10,992 | 2,337 | 23,623 |
| 400 | 21,56  | 6,298  | 15,262 | 73,91873 | 200 | 2,998  | 1,068 | 1,930 | 6,190  | 200 | 2,998  | 1,068 | 1,930  | 6,190  | 100 | 36,45  | 2,668 | 33,78 | 72,82 | 50 | 5,107  | 14,844 | 0,000  | 0,000   | 800 | 16,913 | 14,100 | 2,813 | 28,435 |
| 400 | 24,659 | 6,597  | 18,062 | 87,48002 | 400 | 1,734  | 2,511 | 0,000 | 0,000  | 100 | 1,734  | 2,511 | 0,000  | 0,000  | 100 | 18,429 | 2,686 | 15,74 | 33,94 | 50 | 4,156  | 8,995  | 0,000  | 0,000   | 800 | 9,960  | 12,100 | 0,000 | 0,000  |
| 400 | 28,617 | 6,55   | 22,067 | 106,8775 | 400 | 1,949  | 2,188 | 0,000 | 0,000  | 100 | 1,949  | 2,188 | 0,000  | 0,000  | 50  | 15,163 | 2,562 | 12,60 | 27,16 | 50 | 7,200  | 9,450  | 0,000  | 0,000   | 800 | 11,059 | 5,888  | 5,171 | 52,270 |
| 400 | 24,227 | 7,277  | 16,95  | 82,09425 | 400 | 9,214  | 1,412 | 7,80  | 44,64  | 100 | 1,379  | 0,929 | 0,450  | 1,443  | 50  | 19,417 | 2,055 | 17,36 | 37,43 | 50 | 2,944  | 6,297  | 0,000  | 0,000   |     |        |        |       |        |
| 400 | 23,187 | 6,444  | 16,743 | 81,09168 | 400 | 15,417 | 1,401 | 14,02 | 80,19  | 100 | 3,034  | 2,118 | 0,916  | 2,938  | 100 | 45,826 | 3,509 | 42,32 | 91,22 | 50 | 1,310  | 4,988  | 0,000  | 0,000   |     |        |        |       |        |
| 400 | 27,484 | 6,545  | 20,939 | 101,4142 | 400 | 1,600  | 1,727 | 0,000 | 0,000  | 100 | 1,600  | 1,727 | 0,000  | 0,000  | 50  | 32,356 | 3,826 | 28,53 | 61,50 | 50 | 5,223  | 7,380  | 0,000  | 0,000   |     |        |        |       |        |
| 400 | 28,268 | 6,199  | 22,069 | 106,8872 | 400 | 1,971  | 2,060 | 0,000 | 0,000  | 100 | 1,971  | 2,060 | 0,000  | 0,000  | 100 | 25,281 | 1,985 | 23,30 | 50,22 | 50 | 5,055  | 4,714  | 0,000  | 0,000   |     |        |        |       |        |
| 400 | 23,797 | 6,937  | 16,86  | 81,65835 | 400 | 1,644  | 3,084 | 0,000 | 0,000  | 100 | 1,644  | 3,084 | 0,000  | 0,000  | 50  | 8,268  | 1,078 | 7,19  | 15,50 | 50 | 5,279  | 5,001  | 0,278  | 4,696   |     |        |        |       |        |
| 400 | 30,539 | 8,47   | 22,069 | 106,8872 | 400 | 11,421 | 1,521 | 9,90  | 56,64  | 100 | 2,266  | 3,341 | 0,000  | 0,000  | 100 | 11,897 | 3,247 | 8,65  | 18,65 | 50 | 5,749  | 7,555  | 0,000  | 0,000   |     |        |        |       |        |
| 400 | 29,597 | 5,916  | 23,681 | 114,6946 | 400 | 18,426 | 1,478 | 16,95 | 96,96  | 400 | 1,694  | 1,284 | 0,410  | 1,315  | 200 | 21,439 | 2,222 | 19,22 | 41,42 | 50 | 2,452  | 5,128  | 0,000  | 0,000   |     |        |        |       |        |
| 400 | 26,716 | 5,121  | 21,595 | 104,5915 | 400 | 1,526  | 1,376 | 0,150 | 0,481  | 400 | 1,526  | 1,376 | 0,150  | 0,481  | 200 | 10,304 | 2,169 | 8,14  | 17,54 | 50 | 6,435  | 8,596  | 0,000  | 0,000   |     |        |        |       |        |
| 400 | 23,44  | 5,281  | 18,159 | 87,94982 | 400 | 1,227  | 1,442 | 0,000 | 0,000  | 200 | 1,227  | 1,442 | 0,000  | 0,000  | 100 | 17,729 | 1,936 | 15,79 | 34,04 | 50 | 9,314  | 10,246 | 0,000  | 0,000   |     |        |        |       |        |
| 400 | 20,936 | 5,706  | 15,23  | 73,76374 | 400 | 1,000  | 1,174 | 0,000 | 0,000  | 200 | 1,000  | 1,174 | 0,000  | 0,000  | 200 | 10,413 | 2,846 | 7,57  | 16,31 | 50 | 7,981  | 11,101 | 0,000  | 0,000   |     |        |        |       |        |
| 400 | 16,837 | 5,169  | 11,668 | 56,51184 | 400 | 1,725  | 0,482 | 1,243 | 3,987  | 200 | 20,24  | 2,24  | 18,00  | 38,80  | 200 | 20,24  | 2,24  | 18,00 | 38,80 | 50 | 14,403 | 20,239 | 0,000  | 0,000   |     |        |        |       |        |
| 400 | 18,143 | 5,569  | 12,574 | 60,89989 | 200 | 12,629 | 2,812 | 9,82  |        |     |        |       |        |        |     |        |       |       |       |    |        |        |        |         |     |        |        |       |        |

|        |        |        |         |          |     |        |       |       |        |     |        |        |       |        |     |       |        |       |       |     |        |        |        |         |
|--------|--------|--------|---------|----------|-----|--------|-------|-------|--------|-----|--------|--------|-------|--------|-----|-------|--------|-------|-------|-----|--------|--------|--------|---------|
| 100    | 2,743  | 7,373  | 0       | 0        | 0   | 44,674 | 1,655 | 43,02 | 246,12 | 400 | 2,472  | 3,476  | 0,00  | 0,00   | 100 | 4,303 | 9,239  | 0,000 | 0,000 | 0   | 13,369 | 6,564  | 6,805  | 39,999  |
| 100    | 2,423  | 8,486  | 0       | 0        | 0   | 20,772 | 1,376 | 19,40 | 110,97 | 400 | 1,712  | 1,962  | 0,00  | 0,00   | 100 | 3,644 | 7,819  | 0,000 | 0,000 | 0   | 25,669 | 6,735  | 18,934 | 111,293 |
| 100    | 3,734  | 6,477  | 0       | 0        | 0   | 25,273 | 1,876 | 23,40 | 133,86 | 400 | 1,555  | 2,974  | 0,00  | 0,00   | 100 | 4,533 | 8,342  | 0,000 | 0,000 | 0   | 26,077 | 6,704  | 19,373 | 113,873 |
| 200    | 0,185  | 2,962  | 0       | 0        | 0   | 15,345 | 1,332 | 14,01 | 80,17  | 400 | 1,234  | 2,523  | 0,00  | 0,00   | 100 | 3,369 | 7,227  | 0,000 | 0,000 | 0   | 21,843 | 8,980  | 12,863 | 75,608  |
| 200    | 1,424  | 4,116  | 0       | 0        | 0   | 12,231 | 1,253 | 10,98 | 62,81  | 400 | 2,258  | 2,963  | 0,00  | 0,00   | 100 | 3,473 | 7,818  | 0,000 | 0,000 | 0   | 21,544 | 9,416  | 12,128 | 71,288  |
| 200    | 0,143  | 4,242  | 0       | 0        | 0   | 21,868 | 1,473 | 20,40 | 116,68 | 400 | 2,174  | 3,757  | 0,00  | 0,00   | 100 | 4,106 | 4,290  | 0,000 | 0,000 | 0   | 18,200 | 7,997  | 10,203 | 59,973  |
| 200    | 0,867  | 5,263  | 0       | 0        | 0   | 12,854 | 1,466 | 11,39 | 65,15  | 400 | 2,124  | 3,747  | 0,00  | 0,00   | 100 | 3,170 | 4,925  | 0,000 | 0,000 | 0   | 22,247 | 10,144 | 12,103 | 71,141  |
| 200    | 1,038  | 3,634  | 0       | 0        | 0   | 46,264 | 1,638 | 44,63 | 255,32 | 400 | 2,409  | 4,082  | 0,00  | 0,00   | 100 | 1,517 | 4,479  | 0,000 | 0,000 | 0   | 16,027 | 9,573  | 6,454  | 37,936  |
| 200    | 0,574  | 4,007  | 0       | 0        | 0   | 10,548 | 1,739 | 8,81  | 50,40  | 400 | 2,7    | 3,04   | 0,00  | 0,00   | 100 | 1,428 | 4,416  | 0,000 | 0,000 | 0   | 21,812 | 7,360  | 14,452 | 84,948  |
| 200    | 0,292  | 3,986  | 0       | 0        | 0   | 26,457 | 1,649 | 24,81 | 141,93 | 400 | 1,366  | 1,979  | 0,00  | 0,00   | 100 | 1,276 | 4,680  | 0,000 | 0,000 | 0   | 24,194 | 7,204  | 16,990 | 99,866  |
| 400    | 0,053  | 2,244  | 0       | 0        | 0   | 7,258  | 1,516 | 5,74  | 32,85  | 400 | 1,756  | 1,72   | 0,04  | 0,08   | 200 | 3,538 | 7,810  | 0,000 | 0,000 | 0   | 19,008 | 6,704  | 12,304 | 72,322  |
| 400    | 0,027  | 2,099  | 0       | 0        | 0   | 10,778 | 1,482 | 9,30  | 53,18  | 400 | 2,796  | 4,123  | 0,00  | 0,00   | 200 | 2,908 | 7,322  | 0,000 | 0,000 | 0   | 25,090 | 5,960  | 19,130 | 112,445 |
| 400    | 0,017  | 1,985  | 0       | 0        | 0   | 10,548 | 1,492 | 9,06  | 51,81  | 400 | 4,401  | 4,178  | 0,22  | 0,48   | 200 | 2,565 | 5,994  | 0,000 | 0,000 | 0   | 22,995 | 10,920 | 12,075 | 70,976  |
| 400    | 0,113  | 2,43   | 0       | 0        | 0   | 20,722 | 1,168 | 19,55 | 111,87 | 400 | 4,803  | 3,774  | 1,03  | 2,22   | 200 | 3,569 | 11,775 | 0,000 | 0,000 | 0   | 30,730 | 7,656  | 23,074 | 135,628 |
| 400    | 0,028  | 2,589  | 0       | 0        | 50  | 9,233  | 4,653 | 4,58  | 26,20  | 400 | 2,366  | 3,527  | 0,00  | 0,00   | 200 | 3,225 | 7,909  | 0,000 | 0,000 | 0   | 27,018 | 7,545  | 19,473 | 114,461 |
| 400    | 0,202  | 2,529  | 0       | 0        | 50  | 10,891 | 4,651 | 6,24  | 35,70  | 400 | 2,077  | 3,261  | 0,00  | 0,00   | 200 | 4,167 | 8,936  | 0,000 | 0,000 | 0   | 27,082 | 8,613  | 18,469 | 108,560 |
| 400    | 0,222  | 3,758  | 0       | 0        | 50  | 13,199 | 5,069 | 8,13  | 46,51  | 400 | 3,628  | 4,091  | 0,00  | 0,00   | 200 | 3,303 | 7,052  | 0,000 | 0,000 | 0   | 31,690 | 9,522  | 22,168 | 130,302 |
| 400    | 0,036  | 2,449  | 0       | 0        | 50  | 26,888 | 4,291 | 22,60 | 129,28 | 400 | 1,523  | 2,748  | 0,00  | 0,00   | 200 | 4,040 | 8,671  | 0,000 | 0,000 | 0   | 41,976 | 10,661 | 31,315 | 184,068 |
|        |        |        |         |          | 50  | 9,742  | 2,335 | 7,41  | 42,38  | 400 | 2,847  | 3,621  | 0,00  | 0,00   | 200 | 3,385 | 8,716  | 0,000 | 0,000 | 0   | 19,917 | 8,016  | 11,901 | 69,953  |
| NacGal | IM CA  | IM BKG | INT-BKG | RI%      | 50  | 29,721 | 3,955 | 25,77 | 147,41 | 400 | 2,55   | 5,593  | 0,00  | 0,00   | 200 | 3,146 | 9,157  | 0,000 | 0,000 | 0   | 29,828 | 8,987  | 20,841 | 122,502 |
| 0      | 18,9   | 6,301  | 12,599  | 61,00682 | 50  | 15,492 | 4,083 | 11,41 | 65,27  | 400 | 5,605  | 3,27   | 2,34  | 5,03   | 200 | 2,435 | 7,467  | 0,000 | 0,000 | 0   | 42,151 | 11,738 | 30,413 | 178,766 |
| 0      | 24,977 | 7,978  | 16,999  | 82,31248 | 50  | 13,332 | 4,333 | 9,00  | 51,49  | 400 | 3,598  | 2,851  | 0,75  | 1,61   | 200 | 1,758 | 8,631  | 0,000 | 0,000 | 0   | 33,542 | 11,045 | 22,497 | 132,236 |
| 0      | 23,415 | 7,177  | 16,238  | 78,62757 | 50  | 11,587 | 4,338 | 7,25  | 41,47  | 400 | 3,174  | 2,172  | 1,00  | 2,16   | 200 | 2,545 | 10,445 | 0,000 | 0,000 | 0   | 36,308 | 13,054 | 23,254 | 136,686 |
| 0      | 23,767 | 5,255  | 18,512  | 89,63872 | 50  | 8,871  | 1,894 | 6,98  | 39,92  | 400 | 3,19   | 3,446  | 0,00  | 0,00   | 200 | 2,312 | 9,435  | 0,000 | 0,000 | 0   | 29,012 | 9,760  | 19,252 | 113,162 |
| 0      | 29,3   | 3,87   | 25,43   | 123,137  | 50  | 9,307  | 3,54  | 5,77  | 32,99  | 400 | 3,204  | 3,64   | 0,00  | 0,00   | 200 | 3,017 | 7,684  | 0,000 | 0,000 | 0   | 29,909 | 11,213 | 18,696 | 109,894 |
| 0      | 27,653 | 5,517  | 22,136  | 107,1868 | 50  | 15,201 | 3,151 | 12,05 | 68,94  | 200 | 2,434  | 6,264  | 0,000 | 0,000  | 200 | 3,377 | 5,914  | 0,000 | 0,000 | 0   | 27,159 | 10,875 | 16,284 | 95,716  |
| 0      | 28,779 | 4,586  | 24,193  | 117,1472 | 50  | 25,633 | 2,179 | 23,45 | 134,19 | 200 | 3,129  | 5,999  | 0,000 | 0,000  | 200 | 3,169 | 4,993  | 0,000 | 0,000 | 0   | 26,729 | 8,663  | 18,066 | 106,191 |
| 0      | 29,748 | 5,912  | 23,836  | 115,4186 | 50  | 9,761  | 2,023 | 7,74  | 44,27  | 200 | 3,038  | 8,473  | 0,000 | 0,000  | 200 | 2,911 | 6,097  | 0,000 | 0,000 | 200 | 13,145 | 11,335 | 1,810  | 10,639  |
| 0      | 29,56  | 3,763  | 25,797  | 124,9141 | 50  | 10,09  | 2,747 | 7,34  | 42,01  | 200 | 2,911  | 6,097  | 0,000 | 0,000  | 200 | 2,717 | 5,374  | 0,000 | 0,000 | 200 | 19,369 | 12,990 | 6,379  | 37,495  |
| 0      | 31,519 | 5,25   | 26,269  | 127,1996 | 50  | 24,132 | 2,98  | 21,15 | 121,02 | 200 | 3,744  | 9,019  | 0,000 | 0,000  | 200 | 3,744 | 9,019  | 0,000 | 0,000 | 200 | 7,128  | 12,866 | 0,000  | 0,000   |
| 0      | 26,651 | 6,252  | 20,399  | 98,77594 | 50  | 12,101 | 1,833 | 10,27 | 58,75  | 200 | 3,087  | 7,481  | 0,000 | 0,000  | 200 | 3,087 | 7,481  | 0,000 | 0,000 | 200 | 9,385  | 14,984 | 0,000  | 0,000   |
| 0      | 26,074 | 5,42   | 20,654  | 100,0107 | 50  | 17,474 | 2,882 | 14,59 | 83,48  | 200 | 56,416 | 4,972  | 51,44 | 111,75 | 200 | 6,161 | 7,673  | 0,000 | 0,000 | 200 | 8,944  | 10,322 | 0,000  | 0,000   |
| 0      | 18,899 | 4,663  | 14,236  | 68,93349 | 50  | 16,998 | 2,243 | 14,76 | 84,42  | 200 | 70,676 | 6,689  | 63,99 | 138,99 | 200 | 2,611 | 6,817  | 0,000 | 0,000 | 200 | 12,594 | 19,159 | 0,000  | 0,000   |
| 0      | 28,69  | 5,339  | 23,351  | 113,0701 | 50  | 14,013 | 3,406 | 10,61 | 60,69  | 200 | 56,566 | 6,156  | 50,41 | 109,50 | 200 | 3,524 | 6,474  | 0,000 | 0,000 | 200 | 21,837 | 13,436 | 8,401  | 49,381  |
| 0      | 27,302 | 7,085  | 20,217  | 97,89466 | 50  | 21,741 | 2,496 | 19,25 | 110,11 | 200 | 64,541 | 6,014  | 58,53 | 127,13 | 200 | 3,304 | 6,976  | 0,000 | 0,000 | 200 | 14,114 | 10,319 | 3,795  | 22,307  |
| 0      | 35,133 | 5,629  | 29,504  | 142,8641 | 50  | 10,29  | 2,823 | 7,47  | 42,72  | 200 | 46,541 | 6,386  | 40,16 | 87,22  | 200 | 2,376 | 7,121  | 0,000 | 0,000 | 200 | 18,629 | 12,309 | 6,320  | 37,149  |
| 0      | 25,815 | 5,153  | 20,662  | 100,0494 | 50  | 12,698 | 1,695 | 11,00 | 62,95  | 200 | 65,802 | 5,826  | 59,98 | 130,28 | 200 | 3,326 | 9,457  | 0,000 | 0,000 | 200 | 22,059 | 8,733  | 13,326 | 78,330  |
| 0      | 23,88  | 4,765  | 19,115  | 92,55857 | 50  | 8,321  | 2,142 | 6,18  | 35,35  | 200 | 35,69  | 6,798  | 28,89 | 62,76  | 200 | 3,530 | 5,760  | 0,000 | 0,000 | 200 | 19,755 | 12,026 | 7,729  | 45,431  |
| 0      | 17,367 | 5,13   | 12,237  | 59,25395 | 50  | 11,914 | 2,178 | 9,74  | 55,70  | 200 | 72,03  | 4,869  | 67,16 | 145,89 | 200 | 3,586 | 4,495  | 0,000 | 0,000 | 200 | 22,440 | 11,161 | 11,279 | 66,297  |
| 50     | 18,149 | 7,001  | 11,148  | 53,98079 | 50  | 15     | 1,813 | 13,19 | 75,45  | 200 | 61,376 | 4,496  | 56,88 | 123,55 | 200 | 3,007 | 4,149  | 0,000 | 0,000 | 200 | 21,965 | 13,518 | 8,447  | 49,651  |
| 50     | 23,954 | 5,291  | 18,663  | 90,36989 | 50  | 14,567 | 2,615 | 11,95 | 68,38  | 200 | 65,224 | 4,281  | 60,94 | 132,38 | 200 | 2,826 | 6,862  | 0,000 | 0,000 | 200 | 9,765  | 11,247 | 0,000  | 0,000   |
| 50     | 22,741 | 5,076  | 17,665  | 85,53738 | 50  | 10,584 | 1,687 | 8,90  | 50,90  | 200 | 58,765 | 4,696  | 54,07 | 117,45 | 200 | 2,281 | 4,487  | 0,000 | 0,000 | 200 | 21,200 | 14,212 | 6,988  | 41,075  |
| 50     | 30,316 | 6,579  | 23,737  | 114,9392 | 50  | 8,02   | 1,718 | 6,30  | 36,06  | 200 | 58,682 | 6,197  | 52,49 | 114,01 | 200 | 3,359 | 5,641  | 0,000 | 0,000 | 200 | 21,501 | 12,635 | 8,866  | 52,114  |
| 50     | 28,829 | 4,623  | 24,206  | 117,2102 | 50  | 11,658 | 2,522 | 9,14  | 52,27  | 200 | 50,252 | 13,669 | 36,58 | 79,47  | 400 | 3,287 | 12,183 | 0,000 | 0,000 | 200 | 28,149 | 10,403 | 17,746 | 104,310 |
| 50     | 25,464 | 4,758  | 20,706  | 100,2625 | 50  | 21,184 | 1,877 | 19,31 | 110,46 | 400 | 48,731 | 13,99  | 34,74 | 75,46  | 400 | 4,485 | 10,866 | 0,000 | 0,000 | 200 | 14,524 | 11,094 | 3,430  | 20,161  |
| 50     | 28,795 | 7,118  | 21,677  | 104,9643 | 50  | 6,821  | 1,507 | 5,31  | 30,40  | 400 | 54,438 | 13,682 | 40,76 | 88,53  | 400 | 4,596 | 13,260 | 0,000 | 0,000 | 200 | 26,174 | 10,769 | 15,405 | 90,550  |
| 50     | 33,928 | 5,511  | 28,417  | 137,6007 | 100 | 9,38   | 1,329 | 8,05  | 46,06  | 400 | 49,751 | 13,222 | 36,53 | 79,35  | 400 | 5,265 | 13,167 | 0,000 | 0,000 | 200 | 19,346 | 13,707 | 5,639  | 33,146  |
| 50     | 37,253 | 4,957  | 32,296  | 156,3835 | 100 | 7,217  | 2,096 | 5,12  | 29,30  | 400 | 64,603 | 4,36   | 60,24 | 130,86 | 400 | 5,923 | 16,973 | 0,000 | 0,000 | 200 | 13,264 | 11,340 | 1,924  | 11,309  |
| 50     | 25,362 | 6,985  | 18,377  | 88,98502 | 100 | 23,929 | 1,631 | 22,30 | 127,57 | 400 | 59,4   | 5,024  | 54,38 | 118,12 | 400 | 3,685 | 11,217 | 0,000 | 0,000 | 200 | 14,675 | 9,665  | 5,010  | 29,449  |
| 50     | 17,505 | 8,127  | 9,378   | 45,41011 | 100 | 39,831 | 1,249 | 38,58 | 220,74 | 400 | 50,073 | 6,829  | 43,24 | 93,93  | 400 | 3,226 | 10,207 | 0,000 | 0,000 | 200 | 10,268 | 10,996 | 0,000  | 0,000   |
| 50     | 27,866 | 6,121  | 21,745  | 105,2935 | 100 | 21,502 | 1,358 | 20,14 | 115,25 | 400 | 54,279 | 5,415  | 48,86 | 106,14 | 400 | 3,593 | 7,830  | 0,000 | 0,000 | 2   |        |        |        |         |

|     |        |        |        |          |     |        |       |       |        |    |        |       |       |        |     |       |       |       |       |     |        |        |       |        |
|-----|--------|--------|--------|----------|-----|--------|-------|-------|--------|----|--------|-------|-------|--------|-----|-------|-------|-------|-------|-----|--------|--------|-------|--------|
| 100 | 43,816 | 11,285 | 32,531 | 157,5215 | 100 | 23,612 | 1,457 | 22,16 | 126,75 | 0  | 51,437 | 2,355 | 49,08 | 106,62 | 400 | 1,044 | 6,560 | 0,000 | 0,000 | 400 | 3,395  | 5,983  | 0,000 | 0,000  |
| 100 | 27,064 | 5,338  | 21,726 | 105,2015 | 100 | 9,122  | 1,218 | 7,90  | 45,22  | 0  | 56,593 | 1,986 | 54,61 | 118,62 | 400 | 2,869 | 9,083 | 0,000 | 0,000 | 400 | 3,995  | 10,513 | 0,000 | 0,000  |
| 100 | 28,193 | 9,697  | 18,496 | 89,56125 | 100 | 6,73   | 1,26  | 5,47  | 31,30  | 0  | 50,351 | 2,998 | 47,35 | 102,86 | 400 | 1,248 | 6,703 | 0,000 | 0,000 | 400 | 3,260  | 9,627  | 0,000 | 0,000  |
| 100 | 34,749 | 5,411  | 29,338 | 142,0603 | 100 | 11,798 | 1,545 | 10,25 | 58,66  | 0  | 73,306 | 3,838 | 69,47 | 150,90 | 400 | 2,244 | 7,588 | 0,000 | 0,000 | 400 | 4,507  | 6,460  | 0,000 | 0,000  |
| 100 | 39,128 | 6,801  | 32,327 | 156,5337 | 100 | 31,018 | 1,497 | 29,52 | 168,90 | 0  | 20,552 | 2,491 | 18,06 | 39,23  | 400 | 1,230 | 6,524 | 0,000 | 0,000 | 400 | 3,252  | 8,880  | 0,000 | 0,000  |
| 100 | 33,403 | 3,207  | 30,196 | 146,2149 | 100 | 8,103  | 1,343 | 6,76  | 38,68  | 0  | 57,541 | 3,791 | 53,75 | 116,76 | 400 | 2,880 | 6,597 | 0,000 | 0,000 | 400 | 4,517  | 7,791  | 0,000 | 0,000  |
| 100 | 25,032 | 4,373  | 20,659 | 100,0349 | 100 | 44,246 | 1,664 | 42,58 | 243,62 | 0  | 58,46  | 3,61  | 54,85 | 119,15 | 400 | 1,492 | 6,019 | 0,000 | 0,000 | 400 | 3,985  | 9,682  | 0,000 | 0,000  |
| 100 | 28,777 | 6,071  | 22,706 | 109,9469 | 100 | 35,722 | 1,348 | 34,37 | 196,66 | 0  | 53,75  | 3,47  | 50,28 | 109,22 | 400 |       |       |       |       | 400 | 4,863  | 10,146 | 0,000 | 0,000  |
| 100 | 35,665 | 8,191  | 27,474 | 133,0345 | 100 | 16,94  | 1,324 | 15,62 | 89,34  | 0  | 30,678 | 2,484 | 28,19 | 61,24  | 400 |       |       |       |       | 400 | 4,864  | 8,763  | 0,000 | 0,000  |
| 100 | 28,353 | 14,622 | 13,731 | 66,48819 | 100 | 25,034 | 1,197 | 23,84 | 136,38 | 0  | 57,175 | 2,455 | 54,72 | 118,86 | 400 |       |       |       |       | 400 | 5,605  | 8,013  | 0,000 | 0,000  |
| 100 | 31,109 | 13,103 | 18,006 | 87,18857 | 100 | 27,037 | 1,2   | 25,84 | 147,82 | 0  | 45,484 | 3,026 | 42,46 | 92,23  | 400 |       |       |       |       | 400 | 6,162  | 8,164  | 0,000 | 0,000  |
| 100 | 36,034 | 9,074  | 26,96  | 130,5456 | 100 | 12,972 | 1,22  | 11,75 | 67,24  | 0  | 62,201 | 3,555 | 58,66 | 127,41 | 400 |       |       |       |       | 400 | 6,232  | 7,459  | 0,000 | 0,000  |
| 100 | 30,086 | 8,25   | 21,836 | 105,7342 | 100 | 20,453 | 1,143 | 19,31 | 110,48 | 0  | 62,203 | 2,352 | 59,85 | 130,01 | 400 |       |       |       |       | 400 | 6,014  | 7,577  | 0,000 | 0,000  |
| 100 | 34,227 | 9,524  | 24,703 | 119,6168 | 100 | 22,329 | 0,999 | 21,33 | 122,03 | 0  | 45,876 | 1,762 | 44,11 | 95,82  | 400 |       |       |       |       | 400 | 6,988  | 8,969  | 0,000 | 0,000  |
| 100 | 34,979 | 12,768 | 22,211 | 107,55   | 100 | 28,776 | 1,071 | 27,71 | 158,51 | 0  | 39,289 | 3,067 | 36,22 | 78,68  | 400 |       |       |       |       | 400 | 11,526 | 10,917 | 0,609 | 3,580  |
| 100 | 23,3   | 9,622  | 13,678 | 66,23155 | 100 | 21,083 | 1,261 | 19,82 | 113,41 | 0  | 50,356 | 2,042 | 48,31 | 104,95 | 400 |       |       |       |       | 400 | 6,114  | 6,303  | 0,000 | 0,000  |
| 200 | 23,465 | 5,169  | 18,296 | 88,59281 | 100 | 25,103 | 1,496 | 23,61 | 135,06 | 0  | 69,865 | 2,234 | 67,63 | 146,91 | 400 |       |       |       |       | 400 | 7,359  | 7,862  | 0,000 | 0,000  |
| 200 | 19,687 | 4,01   | 15,677 | 75,9111  | 100 | 13,911 | 1,39  | 12,52 | 71,64  | 0  | 55,471 | 2,001 | 53,47 | 116,15 | 400 |       |       |       |       | 400 | 7,104  | 7,546  | 0,000 | 0,000  |
| 200 | 17,199 | 7,934  | 9,265  | 44,86294 | 100 | 25,175 | 1,212 | 23,96 | 137,10 | 0  | 43,056 | 1,83  | 41,23 | 89,55  | 400 |       |       |       |       | 400 | 8,642  | 9,620  | 0,000 | 0,000  |
| 200 | 28,896 | 8,456  | 20,44  | 98,97447 | 100 | 28,397 | 1,261 | 27,14 | 155,25 | 0  | 73,207 | 2,375 | 70,83 | 153,86 | 400 |       |       |       |       | 800 | 3,284  | 8,648  | 0,000 | 0,000  |
| 200 | 30,458 | 15,127 | 15,331 | 74,2357  | 100 | 41,49  | 1,281 | 40,21 | 230,05 | 0  | 56,509 | 2,053 | 54,46 | 118,29 | 400 |       |       |       |       | 800 | 5,139  | 11,747 | 0,000 | 0,000  |
| 200 | 30,344 | 14,332 | 16,012 | 77,53323 | 100 | 27,342 | 1,239 | 26,10 | 149,34 | 0  | 47,945 | 1,776 | 46,17 | 100,29 | 400 |       |       |       |       | 800 | 4,362  | 13,144 | 0,000 | 0,000  |
| 200 | 28,861 | 17,481 | 11,38  | 55,10418 | 100 | 34,775 | 1,312 | 33,46 | 191,45 | 50 | 36,828 | 3,692 | 33,14 | 71,98  | 400 |       |       |       |       | 800 | 3,524  | 19,357 | 0,000 | 0,000  |
| 200 | 37,975 | 9,823  | 28,152 | 136,3175 | 100 | 20,124 | 1,164 | 18,96 | 108,47 | 50 | 52,012 | 3,804 | 48,21 | 104,72 | 400 |       |       |       |       | 800 | 3,918  | 16,027 | 0,000 | 0,000  |
| 200 | 36,956 | 7,079  | 29,877 | 144,6703 | 100 | 40,546 | 1,373 | 39,17 | 224,12 | 50 | 33,487 | 7,895 | 25,59 | 55,59  | 400 |       |       |       |       | 800 | 4,131  | 12,646 | 0,000 | 0,000  |
| 200 | 40,52  | 8,499  | 32,021 | 155,0519 | 100 | 25,585 | 1,282 | 24,30 | 139,04 | 50 | 33,132 | 7,266 | 25,87 | 56,19  | 400 |       |       |       |       | 800 | 4,659  | 12,428 | 0,000 | 0,000  |
| 200 | 34,745 | 6,367  | 28,378 | 137,4118 | 100 | 18,637 | 1,513 | 17,12 | 97,97  | 50 | 49,101 | 4,175 | 44,93 | 97,59  | 400 |       |       |       |       | 800 | 4,802  | 15,518 | 0,000 | 0,000  |
| 200 | 23,636 | 4,841  | 18,795 | 91,00906 | 100 | 13,279 | 1,541 | 11,74 | 67,16  | 50 | 24,812 | 1,74  | 23,07 | 50,12  | 400 |       |       |       |       | 800 | 4,281  | 16,559 | 0,000 | 0,000  |
| 400 | 51,958 | 9,48   | 42,478 | 205,6868 | 100 | 38,833 | 1,556 | 37,28 | 213,27 | 50 | 28,624 | 2,229 | 26,40 | 57,34  | 400 |       |       |       |       | 800 | 5,061  | 13,488 | 0,000 | 0,000  |
| 400 | 51,64  | 11,344 | 40,296 | 195,1211 | 100 | 10,678 | 1,055 | 9,62  | 55,06  | 50 | 33,671 | 2,11  | 31,56 | 68,56  | 400 |       |       |       |       | 800 | 4,824  | 23,164 | 0,000 | 0,000  |
| 400 | 61,423 | 11,468 | 49,955 | 241,8919 | 100 | 21,518 | 1,304 | 20,21 | 115,65 | 50 | 30,559 | 3,062 | 27,50 | 59,73  | 400 |       |       |       |       | 800 | 8,131  | 12,754 | 0,000 | 0,000  |
| 400 | 42,736 | 13,854 | 28,882 | 139,8523 | 100 | 7,042  | 1,738 | 5,30  | 30,35  | 50 | 28,038 | 2,267 | 25,77 | 55,98  | 400 |       |       |       |       | 800 | 4,384  | 8,757  | 0,000 | 0,000  |
| 400 | 31,387 | 14,874 | 16,513 | 79,95917 | 100 | 20,467 | 1,458 | 19,01 | 108,76 | 50 | 32,428 | 5,599 | 26,83 | 58,28  | 400 |       |       |       |       | 800 | 3,353  | 8,559  | 0,000 | 0,000  |
| 400 | 36,797 | 15,288 | 21,509 | 104,1508 | 100 | 14,499 | 1,388 | 13,11 | 75,01  | 50 | 28,495 | 3,159 | 25,34 | 55,03  | 400 |       |       |       |       | 800 | 3,249  | 9,401  | 0,000 | 0,000  |
| 400 | 63,389 | 19,265 | 44,124 | 213,657  | 100 | 19,774 | 1,88  | 17,89 | 102,38 | 50 | 36,517 | 5,213 | 31,30 | 68,00  | 400 |       |       |       |       | 800 | 4,110  | 5,707  | 0,000 | 0,000  |
| 400 | 51,049 | 21,682 | 29,367 | 142,2008 | 100 | 18,273 | 1,603 | 16,67 | 95,37  | 50 | 25,1   | 4,903 | 20,20 | 43,87  | 400 |       |       |       |       | 800 | 4,111  | 12,725 | 0,000 | 0,000  |
| 400 | 38,066 | 21,804 | 16,262 | 78,74378 | 100 | 18,675 | 1,512 | 17,16 | 98,19  | 50 | 29,459 | 2,865 | 26,59 | 57,77  | 400 |       |       |       |       | 800 | 2,769  | 9,419  | 0,000 | 0,000  |
| 400 | 34,607 | 11,636 | 22,971 | 111,2301 | 100 | 29,766 | 1,639 | 28,13 | 160,92 | 50 | 25,064 | 3,581 | 21,48 | 46,67  | 400 |       |       |       |       | 800 | 3,704  | 9,893  | 0,000 | 0,000  |
| 400 | 41,312 | 7,912  | 33,4   | 161,7293 | 100 | 12,807 | 1,465 | 11,34 | 64,89  | 50 | 20,707 | 3,152 | 17,56 | 38,13  | 400 |       |       |       |       | 800 | 6,174  | 10,133 | 0,000 | 0,000  |
| 400 | 47,368 | 6,447  | 40,921 | 198,1475 | 100 | 11,992 | 1,269 | 10,72 | 61,35  | 50 | 16,306 | 2,794 | 13,51 | 29,35  | 400 |       |       |       |       | 800 | 4,271  | 10,678 | 0,000 | 0,000  |
| 400 | 26,711 | 7,136  | 19,575 | 94,78597 | 100 | 7,841  | 1,521 | 6,32  | 36,16  | 50 | 15,639 | 2,86  | 12,78 | 27,76  | 400 |       |       |       |       | 800 | 3,211  | 8,338  | 0,000 | 0,000  |
| 400 | 56,071 | 8,121  | 47,95  | 232,1833 | 100 | 19,697 | 1,342 | 18,36 | 105,01 | 50 | 17,464 | 2,809 | 14,66 | 31,83  | 400 |       |       |       |       | 800 | 4,617  | 10,724 | 0,000 | 0,000  |
| 400 | 50,179 | 8,81   | 41,369 | 200,3168 | 100 | 11,632 | 1,541 | 10,09 | 57,73  | 50 | 20,811 | 4,216 | 16,60 | 36,05  | 400 |       |       |       |       | 800 | 7,015  | 11,302 | 0,000 | 0,000  |
| 400 | 55,1   | 6,185  | 48,915 | 236,856  | 100 | 35,744 | 1,244 | 34,50 | 197,38 | 50 | 38,67  | 5,72  | 32,95 | 71,57  | 400 |       |       |       |       | 800 | 5,582  | 10,072 | 0,000 | 0,000  |
| 400 | 52,839 | 9,215  | 43,624 | 211,2359 | 100 | 12,161 | 1,781 | 10,38 | 59,39  | 50 | 10,056 | 1,743 | 8,31  | 18,06  | 400 |       |       |       |       | 800 | 3,680  | 11,030 | 0,000 | 0,000  |
| 400 | 43,05  | 10,306 | 32,744 | 158,5528 | 100 | 26,216 | 2,02  | 24,20 | 138,43 | 50 | 36,174 | 4,154 | 32,02 | 69,55  | 400 |       |       |       |       | 800 | 5,847  | 7,082  | 0,000 | 0,000  |
| 400 | 60,463 | 9,557  | 50,906 | 246,4968 | 100 | 22,51  | 2,072 | 20,44 | 116,93 | 50 | 22,944 | 3,11  | 19,83 | 43,08  | 400 |       |       |       |       | 800 | 4,575  | 10,201 | 0,000 | 0,000  |
| 400 | 52,073 | 7,347  | 44,726 | 216,572  | 100 | 35,213 | 1,954 | 33,26 | 190,28 | 50 | 20,135 | 3,424 | 16,71 | 36,30  | 400 |       |       |       |       | 800 | 6,783  | 8,583  | 0,000 | 0,000  |
| 400 | 46,976 | 10,895 | 36,081 | 174,7113 | 100 | 42,99  | 1,978 | 41,01 | 234,64 | 50 | 37,66  | 2,281 | 35,38 | 76,85  | 400 |       |       |       |       | 800 | 3,209  | 9,595  | 0,000 | 0,000  |
| 400 | 55,14  | 13,654 | 41,486 | 200,8833 | 100 | 27,744 | 1,579 | 26,17 | 149,70 | 50 | 51,099 | 2,396 | 48,70 | 105,79 | 400 |       |       |       |       | 800 | 4,121  | 13,549 | 0,000 | 0,000  |
| 400 | 50,331 | 7,603  | 42,728 | 206,8973 | 100 | 29,501 | 1,375 | 28,13 | 160,92 | 50 | 26,66  | 1,142 | 25,52 | 55,43  | 400 |       |       |       |       | 800 | 6,461  | 4,773  | 1,688 | 28,514 |
| 400 | 46,613 | 6,879  | 39,734 | 192,3998 | 100 | 22,167 | 1,269 | 20,90 | 119,56 | 50 | 32,963 | 4,118 | 28,85 | 62,66  | 400 |       |       |       |       | 800 | 6,097  | 4,506  | 1,591 | 26,876 |
| 400 | 35,553 | 7,876  | 27,677 | 134,0174 | 100 | 31,634 | 1,329 | 30,31 | 173,38 | 50 | 28,815 | 2,613 | 26,20 | 56,92  | 400 |       |       |       |       | 800 | 9,965  | 5,307  | 4,658 | 78,685 |
| 400 | 49,17  | 9,444  | 39,726 | 192,3611 | 100 | 18,52  | 1,086 | 17,43 | 99,74  | 50 | 37,555 | 2,936 | 34,62 | 75,20  | 400 |       |       |       |       | 800 | 6,705  | 4,760  | 1,945 | 32,856 |

|     |        |        |        |          |     |        |       |       |        |     |        |       |       |       |     |        |        |       |         |     |        |        |        |         |
|-----|--------|--------|--------|----------|-----|--------|-------|-------|--------|-----|--------|-------|-------|-------|-----|--------|--------|-------|---------|-----|--------|--------|--------|---------|
| 400 | 51,854 | 9,107  | 42,747 | 206,9893 | 200 | 19,76  | 1,513 | 18,25 | 104,40 | 100 | 28,908 | 3,004 | 25,90 | 56,27 | 50  | 7,708  | 4,868  | 2,840 | 47,974  | 0   | 25,754 | 10,718 | 15,036 | 88,381  |
| 400 | 40,409 | 8,889  | 31,52  | 152,626  | 200 | 21,867 | 1,544 | 20,32 | 116,27 | 100 | 19,145 | 2,5   | 16,65 | 36,16 | 50  | 5,652  | 7,005  | 0,000 | 0,000   | 0   | 27,857 | 10,324 | 17,533 | 103,058 |
| 400 | 46,264 | 8,917  | 37,347 | 180,8415 | 200 | 39,587 | 1,467 | 38,12 | 218,09 | 100 | 26,421 | 3,497 | 22,92 | 49,80 | 50  | 6,196  | 4,975  | 1,221 | 20,626  | 0   | 29,745 | 16,240 | 13,505 | 79,382  |
| 400 | 52,156 | 9,951  | 42,205 | 204,3649 | 200 | 26,809 | 1,406 | 25,40 | 145,34 | 100 | 30,734 | 3,799 | 26,94 | 58,51 | 50  | 5,541  | 6,428  | 0,000 | 0,000   | 0   | 35,528 | 11,916 | 23,612 | 138,790 |
| 400 | 44,653 | 9,776  | 34,877 | 168,8812 | 200 | 41,035 | 1,383 | 39,65 | 226,86 | 100 | 28,746 | 3,672 | 25,07 | 54,47 | 50  | 4,648  | 5,337  | 0,000 | 0,000   | 0   | 20,954 | 13,927 | 7,027  | 41,304  |
| 400 | 55,192 | 6,331  | 48,861 | 236,5945 | 200 | 21,803 | 1,311 | 20,49 | 117,24 | 100 | 22,454 | 3,335 | 19,12 | 41,53 | 50  | 8,058  | 6,184  | 1,874 | 31,655  | 0   | 26,458 | 11,345 | 15,113 | 88,833  |
| 400 | 47,129 | 7,13   | 39,999 | 193,683  | 200 | 9,315  | 1,289 | 8,03  | 45,92  | 100 | 23,845 | 3,596 | 20,25 | 43,98 | 50  | 5,321  | 6,547  | 0,000 | 0,000   | 0   | 23,126 | 10,543 | 12,583 | 73,962  |
| 400 | 34,375 | 8,273  | 26,102 | 126,391  | 200 | 23,421 | 1,353 | 22,07 | 126,26 | 100 | 26,755 | 4,179 | 22,58 | 49,04 | 50  | 8,525  | 6,636  | 1,889 | 31,910  | 0   | 28,813 | 8,090  | 20,723 | 121,809 |
| 400 | 54,061 | 31,945 | 22,116 | 107,09   | 200 | 14,045 | 1,425 | 12,62 | 72,20  | 100 | 22,416 | 2,319 | 20,10 | 43,65 | 50  | 7,869  | 6,430  | 1,439 | 24,308  | 0   | 23,001 | 10,673 | 12,328 | 72,463  |
| 400 | 50,342 | 34,001 | 16,341 | 79,12632 | 200 | 12,126 | 1,194 | 10,93 | 62,54  | 100 | 23,512 | 2,759 | 20,75 | 45,08 | 50  | 6,949  | 6,257  | 0,692 | 11,690  | 0   | 19,632 | 10,200 | 9,432  | 55,441  |
| 400 | 72,167 | 21,108 | 51,059 | 247,2377 | 200 | 13,89  | 1,532 | 12,36 | 70,70  | 100 | 29,714 | 4,854 | 24,86 | 54,00 | 50  | 6,742  | 6,338  | 0,404 | 6,825   | 0   | 27,145 | 12,248 | 14,897 | 87,564  |
| 400 | 34,071 | 6,275  | 27,796 | 134,5937 | 200 | 15,852 | 1,313 | 14,54 | 83,18  | 100 | 25,787 | 3,286 | 22,50 | 48,88 | 50  | 8,098  | 7,199  | 0,899 | 15,186  | 0   | 25,824 | 12,803 | 13,021 | 76,537  |
| 400 | 30,723 | 10,927 | 19,796 | 95,8561  | 200 | 4,994  | 1,535 | 3,46  | 19,79  | 100 | 21,963 | 3,252 | 18,71 | 40,64 | 50  | 11,298 | 7,295  | 4,003 | 67,620  | 0   | 21,857 | 10,246 | 11,611 | 68,249  |
| 400 | 41,843 | 16,858 | 24,985 | 120,9823 | 200 | 29,284 | 1,679 | 27,61 | 157,93 | 100 | 22,749 | 4,677 | 18,07 | 39,26 | 50  | 7,756  | 6,950  | 0,806 | 13,615  | 0   | 22,820 | 11,032 | 11,788 | 69,289  |
|     |        |        |        |          | 400 | 2,788  | 2,588 | 0,20  | 1,14   | 100 | 25,337 | 4,168 | 21,17 | 45,98 | 50  | 13,213 | 6,811  | 6,402 | 108,145 | 0   | 27,721 | 8,890  | 18,831 | 110,688 |
|     |        |        |        |          | 400 | 7,028  | 2,298 | 4,73  | 27,06  | 100 | 31,241 | 3,5   | 27,74 | 60,26 | 50  | 5,773  | 3,748  | 2,025 | 34,207  | 0   | 21,960 | 8,853  | 13,107 | 77,042  |
|     |        |        |        |          | 400 | 14,109 | 2,455 | 11,65 | 66,68  | 100 | 18,839 | 3,139 | 15,70 | 34,10 | 50  | 13,243 | 7,487  | 5,756 | 97,233  | 0   | 23,953 | 8,440  | 15,513 | 91,185  |
|     |        |        |        |          | 400 | 8,528  | 2,199 | 6,33  | 36,21  | 100 | 32,216 | 5,378 | 26,84 | 58,30 | 50  | 9,424  | 4,267  | 5,157 | 87,114  | 0   | 24,447 | 11,717 | 12,730 | 74,826  |
|     |        |        |        |          | 400 | 16,661 | 2,963 | 13,70 | 78,37  | 100 | 13,553 | 3,466 | 10,09 | 21,91 | 50  | 11,728 | 5,062  | 6,666 | 112,605 | 0   | 25,818 | 12,247 | 13,571 | 79,770  |
|     |        |        |        |          | 400 | 3,626  | 0,439 | 3,19  | 18,23  | 100 | 18,107 | 2,18  | 15,93 | 34,60 | 50  | 7,909  | 4,876  | 3,033 | 51,235  | 0   | 13,369 | 6,564  | 6,805  | 39,999  |
|     |        |        |        |          | 400 | 4,107  | 1,101 | 3,01  | 17,20  | 100 | 14,533 | 1,945 | 12,59 | 27,34 | 50  | 11,320 | 5,321  | 5,999 | 101,337 | 0   | 25,669 | 6,735  | 18,934 | 111,293 |
|     |        |        |        |          | 400 | 7,39   | 1,182 | 6,21  | 35,52  | 100 | 14,567 | 1,679 | 12,89 | 28,00 | 50  | 7,452  | 6,823  | 0,629 | 10,625  | 0   | 26,077 | 6,704  | 19,373 | 113,873 |
|     |        |        |        |          | 400 | 21,021 | 2,406 | 18,62 | 106,50 | 100 | 17,509 | 4,852 | 12,66 | 27,49 | 50  | 13,480 | 7,294  | 6,186 | 104,496 | 0   | 21,843 | 8,980  | 12,863 | 75,608  |
|     |        |        |        |          | 400 | 28,749 | 2,234 | 26,52 | 151,70 | 100 | 20,585 | 4,25  | 16,34 | 35,48 | 50  | 10,036 | 7,302  | 2,734 | 46,184  | 0   | 21,544 | 9,416  | 12,128 | 71,288  |
|     |        |        |        |          | 400 | 4,789  | 1,724 | 3,07  | 17,54  | 100 | 22,119 | 3,624 | 18,50 | 40,17 | 50  | 18,844 | 13,322 | 5,522 | 93,280  | 0   | 18,200 | 7,997  | 10,203 | 59,973  |
|     |        |        |        |          | 400 | 14,961 | 2,797 | 12,16 | 69,59  | 100 | 24,868 | 3,727 | 21,14 | 45,92 | 50  | 9,711  | 9,720  | 0,000 | 0,000   | 0   | 22,247 | 10,144 | 12,103 | 71,141  |
|     |        |        |        |          | 400 | 18,375 | 1,415 | 16,96 | 97,03  | 100 | 21,419 | 4,114 | 17,31 | 37,59 | 50  | 15,301 | 6,560  | 8,741 | 147,656 | 0   | 16,027 | 9,573  | 6,454  | 37,936  |
|     |        |        |        |          | 400 | 6,842  | 1,942 | 4,90  | 28,03  | 200 | 8,486  | 1,966 | 6,52  | 14,16 | 50  | 14,157 | 8,187  | 5,970 | 100,847 | 0   | 21,812 | 7,360  | 14,452 | 84,948  |
|     |        |        |        |          | 800 | 8,384  | 1,406 | 6,98  | 39,92  | 200 | 7,868  | 2,311 | 5,56  | 12,07 | 100 | 7,030  | 5,816  | 1,214 | 20,507  | 0   | 24,194 | 7,204  | 16,990 | 99,866  |
|     |        |        |        |          | 800 | 8,834  | 1,676 | 7,16  | 40,95  | 200 | 2,794  | 1,563 | 1,23  | 2,67  | 100 | 6,030  | 5,123  | 0,907 | 15,321  | 0   | 19,008 | 6,704  | 12,304 | 72,322  |
|     |        |        |        |          | 800 | 8,467  | 1,682 | 6,79  | 38,82  | 200 | 7,61   | 2,133 | 5,48  | 11,90 | 100 | 8,816  | 5,019  | 3,797 | 64,140  | 0   | 25,090 | 5,960  | 19,130 | 112,445 |
|     |        |        |        |          | 800 | 8,606  | 1,397 | 7,21  | 41,24  | 200 | 4,994  | 2,432 | 2,56  | 5,57  | 100 | 15,235 | 7,058  | 8,177 | 138,129 | 0   | 22,995 | 10,920 | 12,075 | 70,976  |
|     |        |        |        |          | 800 | 9,372  | 2,239 | 7,13  | 40,81  | 200 | 8,318  | 2,336 | 5,98  | 12,99 | 100 | 9,160  | 9,715  | 0,000 | 0,000   | 0   | 30,730 | 7,656  | 23,074 | 135,628 |
|     |        |        |        |          | 800 | 4,91   | 2,245 | 2,67  | 15,25  | 200 | 2,865  | 2,033 | 0,83  | 1,81  | 100 | 14,123 | 7,661  | 6,462 | 109,159 | 0   | 27,018 | 7,545  | 19,473 | 114,461 |
|     |        |        |        |          | 800 | 26,751 | 1,487 | 25,26 | 144,54 | 200 | 5,669  | 2,66  | 3,01  | 6,54  | 100 | 14,605 | 6,722  | 7,883 | 133,163 | 0   | 27,082 | 8,613  | 18,469 | 108,560 |
|     |        |        |        |          | 800 | 22,221 | 1,863 | 20,36 | 116,47 | 200 | 2,47   | 1,457 | 1,01  | 2,20  | 100 | 9,938  | 6,138  | 3,800 | 64,191  | 0   | 31,690 | 9,522  | 22,168 | 130,302 |
|     |        |        |        |          | 800 | 10,871 | 2,105 | 8,77  | 50,15  | 200 | 6,245  | 1,83  | 4,42  | 9,59  | 100 | 16,070 | 6,868  | 9,202 | 155,444 | 0   | 41,976 | 10,661 | 31,315 | 184,068 |
|     |        |        |        |          | 800 | 15,811 | 1,726 | 14,09 | 80,58  | 200 | 4,081  | 1,476 | 2,61  | 5,66  | 100 | 13,399 | 6,384  | 7,015 | 118,500 | 0   | 19,917 | 8,016  | 11,901 | 69,953  |
|     |        |        |        |          | 800 | 11,29  | 2,427 | 8,86  | 50,71  | 200 | 6,21   | 2,212 | 4,00  | 8,68  | 100 | 14,298 | 7,392  | 6,906 | 116,659 | 0   | 29,828 | 8,987  | 20,841 | 122,502 |
|     |        |        |        |          | 800 | 19,588 | 1,712 | 17,88 | 102,27 | 200 | 6,113  | 1,209 | 4,90  | 10,65 | 100 | 6,651  | 4,433  | 2,218 | 37,467  | 0   | 42,151 | 11,738 | 30,413 | 178,766 |
|     |        |        |        |          | 800 | 6,763  | 2,101 | 4,66  | 26,67  | 200 | 5,834  | 1,684 | 4,15  | 9,01  | 100 | 5,444  | 4,928  | 0,516 | 8,716   | 0   | 33,542 | 11,045 | 22,497 | 132,236 |
|     |        |        |        |          | 800 | 37,665 | 2,277 | 35,39 | 202,46 | 200 | 4,072  | 1,27  | 2,80  | 6,09  | 100 | 5,875  | 4,830  | 1,045 | 17,653  | 0   | 36,308 | 13,054 | 23,254 | 136,686 |
|     |        |        |        |          | 800 | 35,177 | 2,473 | 32,70 | 187,11 | 200 | 6,112  | 2,336 | 3,78  | 8,20  | 100 | 5,544  | 4,587  | 0,957 | 16,166  | 0   | 29,012 | 9,760  | 19,252 | 113,162 |
|     |        |        |        |          | 800 | 7,013  | 1,977 | 5,04  | 28,81  | 200 | 6,061  | 2,4   | 3,66  | 7,95  | 100 | 5,273  | 4,973  | 0,300 | 5,068   | 0   | 29,909 | 11,213 | 18,696 | 109,894 |
|     |        |        |        |          | 800 | 8,169  | 3,253 | 4,92  | 28,13  | 200 | 4,419  | 1,494 | 2,93  | 6,35  | 100 | 5,886  | 4,854  | 1,032 | 17,433  | 0   | 27,159 | 10,875 | 16,284 | 95,716  |
|     |        |        |        |          | 800 | 5,149  | 1,958 | 3,19  | 18,26  | 200 | 4,91   | 1,464 | 3,45  | 7,49  | 100 | 5,939  | 5,385  | 0,554 | 9,358   | 0   | 30,385 | 8,713  | 21,672 | 127,387 |
|     |        |        |        |          | 800 | 8,249  | 2,062 | 6,19  | 35,40  | 200 | 3,765  | 1,369 | 2,40  | 5,20  | 100 | 5,679  | 4,025  | 1,654 | 27,940  | 0   | 24,817 | 7,977  | 16,840 | 98,985  |
|     |        |        |        |          | 800 | 9,253  | 1,316 | 7,94  | 45,41  | 200 | 6,245  | 1,205 | 5,04  | 10,95 | 100 | 5,606  | 4,632  | 0,974 | 16,453  | 0   | 26,729 | 8,663  | 18,066 | 106,191 |
|     |        |        |        |          | 800 | 20,937 | 1,471 | 19,47 | 111,37 | 200 | 6,1    | 1,525 | 4,58  | 9,94  | 100 | 9,615  | 5,208  | 4,407 | 74,445  | 200 | 15,995 | 7,546  | 8,449  | 49,663  |
|     |        |        |        |          | 800 | 31,545 | 3,024 | 28,52 | 163,18 | 200 | 3,74   | 1,237 | 2,50  | 5,44  | 100 | 5,800  | 5,196  | 0,604 | 10,203  | 200 | 18,032 | 11,167 | 6,865  | 40,352  |
|     |        |        |        |          | 800 | 16,559 | 5,792 | 10,77 | 61,60  | 200 | 3,587  | 1,851 | 1,74  | 3,77  | 100 | 6,763  | 4,201  | 2,562 | 43,278  | 200 | 15,695 | 9,051  | 6,644  | 39,053  |
|     |        |        |        |          | 800 | 12,928 | 5,273 | 7,66  | 43,80  | 400 | 1,497  | 1,146 | 0,35  | 0,76  | 100 | 6,991  | 5,454  | 1,537 | 25,964  | 200 | 23,525 | 6,700  | 16,825 | 98,896  |
|     |        |        |        |          | 800 | 19,919 | 1,602 | 18,32 | 104,80 | 400 | 1,637  | 1,822 | 0,00  | 0,00  | 100 | 4,840  | 4,653  | 0,187 | 3,159   | 200 | 16,317 | 6,451  | 9,866  | 57,992  |
|     |        |        |        |          | 800 | 8      | 1,617 | 6,38  | 36,52  | 400 | 1,161  | 0,908 | 0,25  | 0,55  | 100 | 4,633  | 4,200  | 0,433 | 7,314   | 200 | 17,647 | 9,833  | 7,814  | 45,930  |
|     |        |        |        |          | 800 | 15,086 | 1,749 | 13,34 | 76,30  | 400 | 1,016  | 1,509 | 0,00  | 0,00  |     |        |        |       |         |     |        |        |        |         |

|    |        |       |       |        |
|----|--------|-------|-------|--------|
| 0  | 15,103 | 1,297 | 13,81 | 59,53  |
| 0  | 34,569 | 1,484 | 33,09 | 142,66 |
| 0  | 14,138 | 0,489 | 13,65 | 58,85  |
| 0  | 15,875 | 1,945 | 13,93 | 60,06  |
| 0  | 20,7   | 1,872 | 18,83 | 81,18  |
| 0  | 11,954 | 1,578 | 10,38 | 44,74  |
| 0  | 20,754 | 1,861 | 18,89 | 81,46  |
| 0  | 50,282 | 2,711 | 47,57 | 205,12 |
| 0  | 33,745 | 1,545 | 32,20 | 138,84 |
| 0  | 13,889 | 0,578 | 13,31 | 57,39  |
| 0  | 22,582 | 1,208 | 21,37 | 92,16  |
| 0  | 14,618 | 1,033 | 13,59 | 58,58  |
| 0  | 11,554 | 1,565 | 9,99  | 43,07  |
| 0  | 11,569 | 1,34  | 10,23 | 44,11  |
| 0  | 23,41  | 1,023 | 22,39 | 96,53  |
| 0  | 33,797 | 0,963 | 32,83 | 141,57 |
| 0  | 26,289 | 0,954 | 25,34 | 109,24 |
| 0  | 10,437 | 1,078 | 9,36  | 40,35  |
| 0  | 21,082 | 0,836 | 20,25 | 87,30  |
| 0  | 8,763  | 1,164 | 7,60  | 32,77  |
| 0  | 37,612 | 1,234 | 36,38 | 156,86 |
| 0  | 16,769 | 1,149 | 15,62 | 67,35  |
| 0  | 29,258 | 1,343 | 27,92 | 120,36 |
| 0  | 11,666 | 1,115 | 10,55 | 45,49  |
| 0  | 25,676 | 0,895 | 24,78 | 106,85 |
| 0  | 39,99  | 1,282 | 38,71 | 166,90 |
| 0  | 18,783 | 1,742 | 17,04 | 73,48  |
| 0  | 25,57  | 2,058 | 23,51 | 101,38 |
| 0  | 12,614 | 2,737 | 9,88  | 42,59  |
| 0  | 21,087 | 2,11  | 18,98 | 81,83  |
| 0  | 14,029 | 2,346 | 11,68 | 50,37  |
| 0  | 32,361 | 2,698 | 29,66 | 127,90 |
| 0  | 56,725 | 2,782 | 53,94 | 232,59 |
| 0  | 33,573 | 3,201 | 30,37 | 130,96 |
| 0  | 33,655 | 2,61  | 31,05 | 133,86 |
| 0  | 29,996 | 2,314 | 27,68 | 119,36 |
| 0  | 11,177 | 3,027 | 8,15  | 35,14  |
| 0  | 13,892 | 2,485 | 11,41 | 49,18  |
| 0  | 25,12  | 1,968 | 23,15 | 99,83  |
| 0  | 46,437 | 3,573 | 42,86 | 184,82 |
| 0  | 20,731 | 3,009 | 17,72 | 76,41  |
| 0  | 9,836  | 3,021 | 6,82  | 29,39  |
| 0  | 16,517 | 3,006 | 13,51 | 58,26  |
| 0  | 16,476 | 3,002 | 13,47 | 58,10  |
| 0  | 23,276 | 1,756 | 21,52 | 92,79  |
| 0  | 24,742 | 3,614 | 21,13 | 91,10  |
| 0  | 36,92  | 3,432 | 33,49 | 144,39 |
| 0  | 41,23  | 2,566 | 38,66 | 166,71 |
| 0  | 63,491 | 6,917 | 56,57 | 243,94 |
| 0  | 59,866 | 5,125 | 54,74 | 236,03 |
| 0  | 52,024 | 5,227 | 46,80 | 201,78 |
| 0  | 41,031 | 5,574 | 35,46 | 152,88 |
| 0  | 55,864 | 3,74  | 52,12 | 224,75 |
| 0  | 28,138 | 8,195 | 19,94 | 85,99  |
| 0  | 11,069 | 2,234 | 8,84  | 38,09  |
| 0  | 35,684 | 2,027 | 33,66 | 145,12 |
| 0  | 17,196 | 2,599 | 14,60 | 62,94  |
| 50 | 13,443 | 0,062 | 13,38 | 57,70  |
| 50 | 16,572 | 0,058 | 16,51 | 71,21  |
| 50 | 8,521  | 0,684 | 7,84  | 33,79  |
| 50 | 8,225  | 0,878 | 7,35  | 31,68  |
| 50 | 23,085 | 1,206 | 21,88 | 94,34  |
| 50 | 8,154  | 1,093 | 7,06  | 30,45  |
| 50 | 18,245 | 0,983 | 17,26 | 74,43  |
| 50 | 13,029 | 1,065 | 11,96 | 51,59  |
| 50 | 16,26  | 1,134 | 15,13 | 65,22  |
| 50 | 37,808 | 0,858 | 36,95 | 159,32 |
| 50 | 27,675 | 1,075 | 26,60 | 114,69 |
| 50 | 10,082 | 0,965 | 9,12  | 39,31  |
| 50 | 18,757 | 1,043 | 17,71 | 76,38  |
| 50 | 38,912 | 1,146 | 37,77 | 162,84 |

|     |        |        |       |         |
|-----|--------|--------|-------|---------|
| 200 | 6,871  | 6,873  | 0,000 | 0,000   |
| 200 | 13,953 | 5,377  | 8,576 | 144,869 |
| 200 | 12,413 | 6,751  | 5,662 | 95,645  |
| 200 | 7,433  | 5,317  | 2,116 | 35,744  |
| 200 | 7,495  | 5,870  | 1,625 | 27,450  |
| 200 | 13,264 | 5,737  | 7,527 | 127,149 |
| 200 | 8,064  | 4,928  | 3,136 | 52,974  |
| 200 | 5,721  | 5,186  | 0,535 | 9,037   |
| 200 | 16,456 | 7,448  | 9,008 | 152,167 |
| 200 | 6,642  | 5,473  | 1,169 | 19,747  |
| 200 | 10,951 | 7,534  | 3,417 | 57,721  |
| 200 | 7,591  | 7,026  | 0,565 | 9,544   |
| 200 | 7,917  | 7,709  | 0,208 | 3,514   |
| 200 | 6,178  | 6,365  | 0,000 | 0,000   |
| 200 | 8,035  | 7,132  | 0,903 | 15,254  |
| 200 | 13,272 | 11,649 | 1,623 | 27,416  |
| 200 | 11,346 | 9,570  | 1,776 | 30,001  |
| 200 | 7,149  | 2,970  | 4,179 | 70,593  |
| 200 | 12,115 | 8,967  | 3,148 | 53,177  |
| 200 | 4,467  | 3,842  | 0,625 | 10,558  |
| 200 | 7,668  | 5,201  | 2,467 | 41,673  |
| 200 | 5,026  | 3,201  | 1,825 | 30,829  |
| 200 | 11,157 | 8,620  | 2,537 | 42,856  |
| 200 | 4,082  | 3,416  | 0,666 | 11,250  |
| 200 | 14,442 | 6,063  | 8,379 | 141,541 |
| 200 | 4,923  | 4,768  | 0,155 | 2,618   |
| 200 | 4,798  | 5,178  | 0,000 | 0,000   |
| 200 | 6,468  | 3,793  | 2,675 | 45,187  |
| 200 | 6,081  | 4,376  | 1,705 | 28,802  |
| 200 | 5,849  | 4,015  | 1,834 | 30,981  |
| 200 | 7,261  | 4,573  | 2,688 | 45,407  |
| 200 | 5,792  | 4,026  | 1,766 | 29,832  |
| 400 | 8,892  | 3,750  | 5,142 | 86,861  |
| 400 | 8,414  | 5,839  | 2,575 | 43,498  |
| 400 | 6,589  | 5,282  | 1,307 | 22,078  |
| 400 | 12,447 | 7,811  | 4,636 | 78,313  |
| 400 | 5,878  | 4,899  | 0,979 | 16,538  |
| 400 | 5,852  | 4,908  | 0,944 | 15,946  |
| 400 | 8,632  | 8,128  | 0,504 | 8,514   |
| 400 | 3,267  | 3,295  | 0,000 | 0,000   |
| 400 | 7,645  | 3,990  | 3,655 | 61,742  |
| 400 | 4,387  | 5,742  | 0,000 | 0,000   |
| 400 | 5,187  | 6,727  | 0,000 | 0,000   |
| 400 | 3,919  | 4,915  | 0,000 | 0,000   |
| 400 | 9,096  | 5,016  | 4,080 | 68,921  |
| 400 | 7,729  | 5,241  | 2,488 | 42,028  |
| 400 | 10,328 | 5,602  | 4,726 | 79,833  |
| 400 | 8,049  | 6,610  | 1,439 | 24,308  |
| 400 | 5,883  | 5,134  | 0,749 | 12,652  |
| 400 | 9,288  | 8,770  | 0,518 | 8,750   |
| 400 | 7,572  | 6,629  | 0,943 | 15,930  |
| 400 | 8,250  | 8,590  | 0,000 | 0,000   |
| 400 | 10,060 | 6,454  | 3,606 | 60,914  |
| 400 | 5,231  | 4,534  | 0,697 | 11,774  |
| 400 | 6,453  | 6,162  | 0,291 | 4,916   |
| 400 | 12,214 | 8,009  | 4,205 | 71,032  |
| 400 | 11,365 | 6,816  | 4,549 | 76,843  |
| 400 | 7,951  | 6,970  | 0,981 | 16,571  |
| 400 | 7,115  | 7,052  | 0,063 | 1,064   |
| 400 | 6,460  | 6,037  | 0,423 | 7,145   |
| 400 | 7,870  | 8,020  | 0,000 | 0,000   |
| 400 | 7,562  | 9,359  | 0,000 | 0,000   |
| 400 | 6,664  | 6,968  | 0,000 | 0,000   |
| 400 | 10,927 | 7,312  | 3,615 | 61,066  |
| 400 | 6,315  | 2,348  | 3,967 | 67,012  |
| 400 | 8,938  | 5,936  | 3,002 | 50,711  |
| 400 | 4,559  | 4,161  | 0,398 | 6,723   |
| 400 | 9,077  | 4,476  | 4,601 | 77,722  |
| 400 | 7,242  | 3,417  | 3,825 | 64,613  |
| 400 | 7,379  | 4,536  | 2,843 | 48,025  |
| 400 | 8,642  | 5,077  | 3,565 | 60,221  |

|     |        |        |        |        |
|-----|--------|--------|--------|--------|
| 200 | 19,060 | 10,141 | 8,919  | 52,425 |
| 200 | 18,712 | 9,119  | 9,593  | 56,387 |
| 400 | 12,732 | 4,600  | 8,132  | 47,799 |
| 400 | 10,990 | 4,507  | 6,483  | 38,107 |
| 400 | 17,502 | 7,073  | 10,429 | 61,301 |
| 400 | 16,017 | 5,866  | 10,151 | 59,667 |
| 400 | 20,657 | 9,002  | 11,655 | 68,507 |
| 400 | 18,528 | 7,539  | 10,989 | 64,593 |
| 400 | 18,601 | 8,647  | 9,954  | 58,509 |
| 400 | 19,150 | 8,239  | 10,911 | 64,134 |
| 400 | 18,133 | 9,509  | 8,624  | 50,691 |
| 400 | 15,565 | 7,988  | 7,577  | 44,537 |
| 400 | 16,565 | 7,976  | 8,589  | 50,486 |
| 400 | 16,838 | 8,807  | 8,031  | 47,206 |
| 400 | 16,146 | 10,117 | 6,029  | 35,438 |
| 400 | 15,316 | 8,149  | 7,167  | 42,127 |
| 400 | 17,244 | 8,350  | 8,894  | 52,278 |
| 400 | 11,943 | 7,200  | 4,743  | 27,879 |
| 400 | 14,206 | 7,902  | 6,304  | 37,055 |
| 400 | 18,393 | 11,255 | 7,138  | 41,957 |
| 400 | 17,218 | 7,527  | 9,691  | 56,963 |
| 400 | 20,916 | 8,603  | 12,313 | 72,375 |
| 400 | 16,310 | 8,741  | 7,569  | 44,490 |
| 400 | 15,788 | 9,477  | 6,311  | 37,096 |
| 400 | 13,004 | 8,577  | 4,427  | 26,022 |
| 400 | 17,235 | 10,340 | 6,895  | 40,528 |
| 400 | 17,152 | 10,266 | 6,886  | 40,476 |
| 800 | 10,426 | 9,193  | 1,233  | 7,248  |
| 800 | 15,196 | 10,316 | 4,880  | 28,684 |
| 800 | 16,087 | 11,494 | 4,593  | 26,997 |
| 800 | 10,628 | 9,479  | 1,149  | 6,754  |
| 800 | 5,679  | 12,021 | 0,000  | 0,000  |
| 800 | 12,030 | 10,094 | 1,936  | 11,380 |
| 800 | 7,913  | 13,700 | 0,000  | 0,000  |
| 800 | 16,248 | 11,233 | 5,015  | 29,478 |
| 800 | 24,466 | 13,772 | 10,694 | 62,859 |
| 800 | 24,478 | 23,976 | 0,502  | 2,951  |
| 800 | 18,868 | 15,044 | 3,824  | 22,477 |
| 800 | 21,839 | 15,309 | 6,530  | 38,383 |
| 800 | 23,619 | 13,305 | 10,314 | 60,625 |
| 800 | 28,342 | 22,048 | 6,294  | 36,996 |
| 800 | 16,809 | 10,768 | 6,041  | 35,509 |
| 800 | 15,780 | 8,997  | 6,783  | 39,870 |
| 800 | 17,363 | 6,798  | 10,565 | 62,100 |
| 800 | 13,158 | 6,523  | 6,635  | 39,000 |

| Gal | RI     | BKG    | RI-BKG | RI%     |
|-----|--------|--------|--------|---------|
| 0   | 42,915 | 4,513  | 38,402 | 167,162 |
| 0   | 39,957 | 2,552  | 37,405 | 162,822 |
| 0   | 36,092 | 5,212  | 30,880 | 134,419 |
| 0   | 27,120 | 6,067  | 21,053 | 91,643  |
| 0   | 28,937 | 4,353  | 24,584 | 107,013 |
| 0   | 32,143 | 3,571  | 28,572 | 124,372 |
| 0   | 32,805 | 3,783  | 29,022 | 126,331 |
| 0   | 53,870 | 5,367  | 48,503 | 211,131 |
| 0   | 40,904 | 6,247  | 34,657 | 150,860 |
| 0   | 41,614 | 5,428  | 36,186 | 157,516 |
| 0   | 43,696 | 7,158  | 36,538 | 159,048 |
| 0   | 36,065 | 9,731  | 26,334 | 114,630 |
| 0   | 37,297 | 6,909  | 30,388 | 132,277 |
| 0   | 46,197 | 7,851  | 38,346 | 166,918 |
| 0   | 35,676 | 8,219  | 27,457 | 119,519 |
| 0   | 47,154 | 9,385  | 37,769 | 164,406 |
| 0   | 45,699 | 8,205  | 37,494 | 163,209 |
| 0   | 37,990 | 7,530  | 30,460 | 132,591 |
| 0   | 38,982 | 9,165  | 29,817 | 129,792 |
| 0   | 44,030 | 10,100 | 33,930 | 147,695 |
| 0   | 42,055 | 10,479 | 31,576 | 137,449 |
| 0   | 53,660 | 8,190  | 45,470 | 197,928 |
| 0   | 51,363 | 6,648  | 44,715 | 194,642 |
| 0   | 30,309 | 4,286  | 26,023 | 113,277 |

|     |        |       |       |        |
|-----|--------|-------|-------|--------|
| 50  | 17,822 | 1,084 | 16,74 | 72,17  |
| 50  | 13,53  | 0,977 | 12,55 | 54,13  |
| 50  | 8,756  | 0,783 | 7,97  | 34,38  |
| 50  | 7,54   | 1,161 | 6,38  | 27,51  |
| 50  | 11,749 | 0,846 | 10,90 | 47,01  |
| 50  | 18,176 | 1,501 | 16,68 | 71,90  |
| 50  | 12,885 | 1,609 | 11,28 | 48,62  |
| 50  | 17,824 | 1,547 | 16,28 | 70,18  |
| 50  | 34,014 | 1,447 | 32,57 | 140,42 |
| 50  | 28,733 | 1,376 | 27,36 | 117,96 |
| 50  | 53,911 | 1,061 | 52,85 | 227,88 |
| 50  | 21,959 | 1,802 | 20,16 | 86,91  |
| 50  | 18,292 | 1,616 | 16,68 | 71,90  |
| 50  | 21,591 | 2,171 | 19,42 | 83,74  |
| 50  | 24,348 | 2,273 | 22,08 | 95,18  |
| 50  | 22,998 | 1,689 | 21,31 | 91,88  |
| 50  | 27,158 | 1,832 | 25,33 | 109,20 |
| 50  | 33,154 | 1,466 | 31,69 | 136,63 |
| 50  | 9,094  | 1,237 | 7,86  | 33,88  |
| 50  | 30,168 | 2,126 | 28,04 | 120,91 |
| 50  | 42,273 | 3,216 | 39,06 | 168,41 |
| 50  | 30,853 | 2,33  | 28,52 | 122,99 |
| 50  | 22,977 | 2,382 | 20,60 | 88,80  |
| 50  | 13,506 | 1,349 | 12,16 | 52,42  |
| 50  | 14,254 | 2,521 | 11,73 | 50,59  |
| 50  | 15,032 | 2,273 | 12,76 | 55,01  |
| 50  | 8,808  | 1,683 | 7,13  | 30,72  |
| 50  | 28,207 | 2,323 | 25,88 | 111,61 |
| 50  | 18,345 | 2,51  | 15,84 | 68,28  |
| 50  | 36,838 | 1,352 | 35,49 | 153,01 |
| 50  | 10,619 | 1,829 | 8,79  | 37,90  |
| 50  | 14,507 | 1,28  | 13,23 | 57,03  |
| 50  | 11,737 | 1,314 | 10,42 | 44,94  |
| 50  | 33,094 | 1,4   | 31,69 | 136,66 |
| 50  | 32,335 | 2,028 | 30,31 | 130,68 |
| 50  | 43,812 | 1,6   | 42,21 | 182,01 |
| 50  | 47,266 | 1,566 | 45,70 | 197,05 |
| 50  | 13,391 | 1,386 | 12,01 | 51,76  |
| 50  | 36,071 | 1,54  | 34,53 | 148,89 |
| 50  | 41,711 | 1,79  | 39,92 | 172,13 |
| 50  | 9,762  | 1,249 | 8,51  | 36,71  |
| 50  | 13,43  | 1,437 | 11,99 | 51,71  |
| 100 | 32,842 | 2,408 | 30,43 | 131,23 |
| 100 | 45,439 | 2,7   | 42,74 | 184,28 |
| 100 | 31,386 | 2,151 | 29,24 | 126,06 |
| 100 | 17,903 | 1,911 | 15,99 | 68,95  |
| 100 | 27,163 | 2,013 | 25,15 | 108,44 |
| 100 | 25,344 | 1,881 | 23,46 | 101,17 |
| 100 | 15,965 | 1,941 | 14,02 | 60,47  |
| 100 | 8,336  | 1,316 | 7,02  | 30,27  |
| 100 | 36,935 | 1,146 | 35,79 | 154,32 |
| 100 | 13,792 | 1,144 | 12,65 | 54,54  |
| 100 | 15,243 | 1,467 | 13,78 | 59,40  |
| 100 | 13,253 | 2,276 | 10,98 | 47,33  |
| 100 | 17,179 | 2,115 | 15,06 | 64,95  |
| 100 | 43,499 | 2,195 | 41,30 | 178,10 |
| 100 | 53,428 | 3,1   | 50,33 | 217,01 |
| 100 | 27,24  | 2,072 | 25,17 | 108,52 |
| 100 | 29,957 | 2,586 | 27,37 | 118,02 |
| 100 | 33,806 | 1,471 | 32,34 | 139,42 |
| 100 | 8,999  | 1,173 | 7,83  | 33,74  |
| 100 | 25,957 | 1,523 | 24,43 | 105,36 |
| 100 | 59,967 | 2,1   | 57,87 | 249,51 |
| 100 | 18,145 | 2,148 | 16,00 | 68,98  |
| 100 | 58,392 | 5,88  | 52,51 | 226,42 |
| 100 | 46,67  | 2,03  | 44,64 | 192,48 |
| 100 | 20,04  | 2,758 | 17,28 | 74,52  |
| 100 | 17,035 | 2,477 | 14,56 | 62,77  |
| 100 | 10,579 | 2,279 | 8,30  | 35,79  |
| 100 | 30,14  | 3,379 | 26,76 | 115,39 |
| 100 | 15,118 | 2,402 | 12,72 | 54,83  |

| Gal | RI     | BKG    | RI-BKG | RI%     |
|-----|--------|--------|--------|---------|
| 0   | 22,382 | 8,432  | 13,950 | 149,154 |
| 0   | 21,508 | 8,015  | 13,493 | 144,268 |
| 0   | 23,600 | 6,682  | 16,918 | 180,889 |
| 0   | 20,449 | 9,659  | 10,790 | 115,367 |
| 0   | 9,615  | 6,040  | 3,575  | 38,224  |
| 0   | 9,709  | 5,804  | 3,905  | 41,753  |
| 0   | 16,132 | 6,525  | 9,607  | 102,719 |
| 0   | 12,766 | 9,393  | 3,373  | 36,064  |
| 0   | 15,977 | 6,006  | 9,971  | 106,611 |
| 0   | 12,637 | 4,820  | 7,817  | 83,580  |
| 0   | 15,803 | 7,409  | 8,394  | 89,749  |
| 0   | 16,346 | 6,693  | 9,653  | 103,211 |
| 0   | 11,921 | 5,541  | 6,380  | 68,215  |
| 0   | 18,556 | 6,490  | 12,066 | 129,011 |
| 0   | 14,193 | 4,580  | 9,613  | 102,783 |
| 0   | 15,074 | 5,002  | 10,072 | 107,691 |
| 0   | 15,242 | 5,811  | 9,431  | 100,837 |
| 0   | 14,179 | 4,273  | 9,906  | 105,916 |
| 0   | 16,358 | 5,007  | 11,351 | 121,366 |
| 0   | 13,344 | 5,933  | 7,411  | 79,239  |
| 0   | 13,709 | 7,015  | 6,694  | 71,573  |
| 0   | 20,903 | 6,891  | 14,012 | 149,817 |
| 0   | 22,826 | 7,793  | 15,033 | 160,734 |
| 0   | 10,333 | 6,880  | 3,453  | 36,920  |
| 0   | 19,995 | 9,516  | 10,479 | 112,042 |
| 0   | 12,108 | 5,272  | 6,836  | 73,091  |
| 0   | 11,658 | 5,481  | 6,177  | 66,045  |
| 0   | 13,162 | 4,755  | 8,407  | 89,888  |
| 0   | 13,297 | 4,763  | 8,534  | 91,246  |
| 0   | 12,967 | 4,846  | 8,121  | 86,830  |
| 0   | 15,063 | 6,119  | 8,944  | 95,630  |
| 0   | 22,467 | 7,462  | 15,005 | 160,435 |
| 0   | 13,095 | 4,517  | 8,578  | 91,717  |
| 0   | 18,860 | 5,455  | 13,405 | 143,327 |
| 0   | 14,429 | 5,074  | 9,355  | 100,024 |
| 0   | 12,826 | 6,837  | 5,989  | 64,035  |
| 50  | 19,975 | 8,129  | 11,846 | 126,658 |
| 50  | 22,229 | 6,057  | 16,172 | 172,912 |
| 50  | 12,514 | 6,738  | 5,776  | 61,757  |
| 50  | 16,270 | 8,144  | 8,126  | 86,884  |
| 50  | 15,232 | 5,960  | 9,272  | 99,137  |
| 50  | 22,371 | 5,923  | 16,448 | 175,863 |
| 50  | 18,789 | 9,951  | 8,838  | 94,497  |
| 50  | 20,050 | 10,386 | 9,664  | 103,328 |
| 50  | 22,857 | 11,480 | 11,377 | 121,644 |
| 50  | 20,961 | 11,244 | 9,717  | 103,895 |
| 50  | 16,731 | 10,661 | 6,070  | 64,901  |
| 50  | 24,070 | 9,047  | 15,023 | 160,627 |
| 50  | 20,576 | 10,918 | 9,658  | 103,264 |
| 50  | 23,791 | 12,721 | 11,070 | 118,361 |
| 50  | 21,930 | 15,727 | 6,203  | 66,323  |
| 50  | 22,873 | 11,618 | 11,255 | 120,339 |
| 50  | 19,628 | 9,512  | 10,116 | 108,161 |
| 50  | 20,784 | 9,016  | 11,768 | 125,824 |
| 50  | 16,157 | 8,335  | 7,822  | 83,633  |
| 50  | 17,010 | 6,240  | 10,770 | 115,154 |
| 50  | 18,728 | 5,831  | 12,897 | 137,896 |
| 50  | 17,966 | 9,610  | 8,356  | 89,343  |
| 50  | 20,217 | 8,775  | 11,442 | 122,339 |
| 50  | 20,063 | 8,271  | 11,792 | 126,081 |
| 50  | 15,887 | 8,269  | 7,618  | 81,452  |
| 50  | 15,830 | 8,091  | 7,739  | 82,746  |
| 50  | 16,576 | 8,130  | 8,446  | 90,305  |
| 50  | 14,963 | 6,814  | 8,149  | 87,130  |
| 50  | 17,187 | 6,786  | 10,401 | 111,208 |
| 50  | 20,031 | 9,324  | 10,707 | 114,480 |
| 100 | 24,632 | 11,500 | 13,132 | 140,408 |
| 100 | 24,242 | 10,122 | 14,120 | 150,972 |
| 100 | 12,569 | 6,169  | 6,400  | 68,429  |

|     |        |       |        |         |
|-----|--------|-------|--------|---------|
| 0   | 23,766 | 4,046 | 19,720 | 85,840  |
| 0   | 23,453 | 2,295 | 21,158 | 92,100  |
| 0   | 15,243 | 2,882 | 12,361 | 53,807  |
| 0   | 24,894 | 5,156 | 19,738 | 85,918  |
| 0   | 15,333 | 2,477 | 12,856 | 55,961  |
| 0   | 17,837 | 2,084 | 15,753 | 68,572  |
| 0   | 14,546 | 2,781 | 11,765 | 51,212  |
| 0   | 13,537 | 2,126 | 11,411 | 49,671  |
| 0   | 14,326 | 3,333 | 10,993 | 47,852  |
| 0   | 16,654 | 3,064 | 13,590 | 59,156  |
| 0   | 32,633 | 1,633 | 31,000 | 134,941 |
| 0   | 13,344 | 1,741 | 11,603 | 50,507  |
| 0   | 40,344 | 1,188 | 39,156 | 170,444 |
| 0   | 12,527 | 3,525 | 9,002  | 39,185  |
| 0   | 15,938 | 2,669 | 13,269 | 57,759  |
| 0   | 31,163 | 3,314 | 27,849 | 121,225 |
| 0   | 11,462 | 3,787 | 7,675  | 33,409  |
| 0   | 16,386 | 2,061 | 14,325 | 62,356  |
| 0   | 18,724 | 3,478 | 15,246 | 66,365  |
| 0   | 13,865 | 4,694 | 9,171  | 39,921  |
| 0   | 20,533 | 2,990 | 17,543 | 76,364  |
| 0   | 17,891 | 4,825 | 13,066 | 56,876  |
| 0   | 16,924 | 3,168 | 13,756 | 59,879  |
| 0   | 18,865 | 3,561 | 15,304 | 66,617  |
| 0   | 21,331 | 4,162 | 17,169 | 74,736  |
| 0   | 13,112 | 3,531 | 9,581  | 41,706  |
| 0   | 15,574 | 3,393 | 12,181 | 53,023  |
| 0   | 16,971 | 3,737 | 13,234 | 57,607  |
| 0   | 21,624 | 5,423 | 16,201 | 70,522  |
| 0   | 23,649 | 3,160 | 20,489 | 89,187  |
| 0   | 19,076 | 3,626 | 15,450 | 67,253  |
| 0   | 19,432 | 3,067 | 16,365 | 71,236  |
| 0   | 19,564 | 3,328 | 16,236 | 70,674  |
| 0   | 15,393 | 2,849 | 12,544 | 54,603  |
| 0   | 16,921 | 1,865 | 15,056 | 65,538  |
| 0   | 17,087 | 1,453 | 15,634 | 68,054  |
| 0   | 19,090 | 1,380 | 17,710 | 77,091  |
| 0   | 19,247 | 1,363 | 17,884 | 77,848  |
| 0   | 16,313 | 1,479 | 14,834 | 64,572  |
| 0   | 18,059 | 2,148 | 15,911 | 69,260  |
| 0   | 15,306 | 2,310 | 12,996 | 56,571  |
| 0   | 23,454 | 1,839 | 21,615 | 94,089  |
| 0   | 20,599 | 2,669 | 17,930 | 78,048  |
| 0   | 20,479 | 2,977 | 17,502 | 76,185  |
| 0   | 18,891 | 3,106 | 15,785 | 68,711  |
| 0   | 22,223 | 2,763 | 19,460 | 84,708  |
| 0   | 23,612 | 2,363 | 21,249 | 92,496  |
| 0   | 28,341 | 2,493 | 25,848 | 112,515 |
| 0   | 35,218 | 3,208 | 32,010 | 139,338 |
| 0   | 32,632 | 1,403 | 31,229 | 135,938 |
| 0   | 23,178 | 2,211 | 20,967 | 91,268  |
| 0   | 20,551 | 2,243 | 18,308 | 79,694  |
| 0   | 35,758 | 1,502 | 34,256 | 149,114 |
| 0   | 30,611 | 2,977 | 27,634 | 120,289 |
| 0   | 41,917 | 2,507 | 39,410 | 171,549 |
| 0   | 32,909 | 2,535 | 30,374 | 132,216 |
| 0   | 32,440 | 2,646 | 29,794 | 129,692 |
| 0   | 27,690 | 4,319 | 23,371 | 101,733 |
| 0   | 25,613 | 3,593 | 22,020 | 95,852  |
| 0   | 24,657 | 3,910 | 20,747 | 90,311  |
| 0   | 28,620 | 3,511 | 25,109 | 109,298 |
| 0   | 33,412 | 4,721 | 28,691 | 124,890 |
| 200 | 37,973 | 3,912 | 34,061 | 148,266 |
| 200 | 29,441 | 5,274 | 24,167 | 105,198 |
| 200 | 33,335 | 4,588 | 28,747 | 125,134 |
| 200 | 34,421 | 3,048 | 31,373 | 136,565 |
| 200 | 38,439 | 3,063 | 35,376 | 153,990 |
| 200 | 32,408 | 3,290 | 29,118 | 126,749 |
| 200 | 23,725 | 3,239 | 20,486 | 89,174  |
| 200 | 32,223 | 1,100 | 31,123 | 135,477 |
| 200 | 28,596 | 5,036 | 23,560 | 102,555 |

|     |        |       |       |        |
|-----|--------|-------|-------|--------|
| 100 | 11,838 | 2,632 | 9,21  | 39,69  |
| 100 | 36,003 | 2,182 | 33,82 | 145,83 |
| 100 | 54,983 | 2,159 | 52,82 | 227,77 |
| 100 | 16,319 | 2,831 | 13,49 | 58,16  |
| 100 | 24,522 | 1,266 | 23,26 | 100,28 |
| 100 | 23,401 | 2,818 | 20,58 | 88,75  |
| 100 | 16,692 | 1,658 | 15,03 | 64,82  |
| 200 | 37,13  | 1,61  | 35,52 | 153,16 |
| 200 | 14,938 | 1,637 | 13,30 | 57,35  |
| 200 | 18,8   | 1,035 | 17,77 | 76,60  |
| 200 | 19,58  | 1,371 | 18,21 | 78,51  |
| 200 | 19,592 | 1,143 | 18,45 | 79,55  |
| 200 | 8,563  | 1,207 | 7,36  | 31,72  |
| 200 | 41,196 | 1,198 | 40,00 | 172,46 |
| 200 | 20,208 | 0,994 | 19,21 | 82,85  |
| 200 | 8,815  | 0,982 | 7,83  | 33,77  |
| 200 | 34,694 | 1,125 | 33,57 | 144,74 |
| 200 | 16,69  | 1,201 | 15,49 | 66,79  |
| 200 | 14,896 | 1,295 | 13,60 | 58,65  |
| 200 | 32,397 | 3,587 | 28,81 | 124,22 |
| 200 | 7,143  | 2,002 | 5,14  | 22,17  |
| 200 | 14,159 | 2,007 | 12,15 | 52,40  |
| 200 | 13,102 | 1,479 | 11,62 | 50,12  |
| 200 | 39,564 | 2,005 | 37,56 | 161,95 |
| 200 | 39,261 | 1,971 | 37,29 | 160,79 |
| 200 | 32,422 | 1,9   | 30,52 | 131,61 |
| 200 | 14,192 | 1,715 | 12,48 | 53,80  |
| 200 | 14,612 | 1,6   | 13,01 | 56,11  |
| 200 | 16,561 | 1,86  | 14,70 | 63,39  |
| 200 | 15,721 | 1,301 | 14,42 | 62,18  |
| 200 | 10,472 | 1,325 | 9,15  | 39,44  |
| 200 | 10,637 | 1,06  | 9,58  | 41,29  |
| 200 | 15,25  | 1,883 | 13,37 | 57,64  |
| 200 | 11,139 | 1,42  | 9,72  | 41,91  |
| 200 | 20,306 | 1,151 | 19,16 | 82,59  |
| 200 | 17,937 | 1,147 | 16,79 | 72,40  |
| 200 | 20,75  | 1,499 | 19,25 | 83,01  |
| 200 | 13,691 | 1,179 | 12,51 | 53,95  |
| 200 | 9,818  | 1,112 | 8,71  | 37,54  |
| 200 | 12,942 | 1,366 | 11,58 | 49,91  |
| 200 | 9,381  | 1,309 | 8,07  | 34,81  |
| 200 | 12,249 | 1,139 | 11,11 | 47,90  |
| 200 | 11,554 | 1,135 | 10,42 | 44,92  |
| 200 | 36,305 | 1,091 | 35,21 | 151,84 |
| 200 | 15,141 | 1,116 | 14,03 | 60,47  |
| 200 | 9,771  | 1,038 | 8,73  | 37,66  |
| 200 | 9,841  | 1,3   | 8,54  | 36,83  |
| 200 | 35,953 | 1,467 | 34,49 | 148,70 |
| 200 | 18,559 | 1,574 | 16,99 | 73,24  |
| 200 | 31,068 | 1,797 | 29,27 | 126,21 |
| 200 | 19,922 | 1,87  | 18,05 | 77,84  |
| 200 | 33,338 | 1,196 | 32,14 | 138,59 |
| 200 | 16,728 | 1,081 | 15,65 | 67,47  |
| 200 | 19,583 | 1,599 | 17,98 | 77,54  |
| 200 | 10,339 | 1,602 | 8,74  | 37,67  |
| 200 | 13,523 | 1,506 | 12,02 | 51,82  |
| 200 | 30,614 | 1,647 | 28,97 | 124,90 |
| 200 | 8,844  | 1,016 | 7,83  | 33,75  |
| 200 | 11,852 | 1,437 | 10,42 | 44,91  |
| 200 | 26,417 | 1,641 | 24,78 | 106,83 |
| 200 | 17,679 | 1,697 | 15,98 | 68,91  |
| 200 | 8,446  | 2,021 | 6,43  | 27,70  |
| 200 | 13,199 | 1,692 | 11,51 | 49,62  |
| 200 | 4,869  | 1,029 | 3,84  | 16,56  |
| 400 | 18,264 | 1,242 | 17,02 | 73,40  |
| 400 | 42,885 | 1,434 | 41,45 | 178,73 |
| 400 | 23,659 | 1,416 | 22,24 | 95,91  |
| 400 | 13,109 | 1,267 | 11,84 | 51,06  |
| 400 | 9,901  | 1,122 | 8,78  | 37,85  |
| 400 | 12,048 | 1,152 | 10,90 | 46,98  |
| 400 | 22,81  | 1,155 | 21,66 | 93,37  |

|     |        |        |        |         |     |        |       |        |         |
|-----|--------|--------|--------|---------|-----|--------|-------|--------|---------|
| 100 | 18,267 | 6,186  | 12,081 | 129,171 | 200 | 23,092 | 3,878 | 19,214 | 83,637  |
| 100 | 19,309 | 6,727  | 12,582 | 134,528 | 200 | 21,109 | 5,694 | 15,415 | 67,101  |
| 100 | 17,653 | 8,032  | 9,621  | 102,868 | 200 | 28,518 | 5,044 | 23,474 | 102,181 |
| 100 | 21,104 | 6,551  | 14,553 | 155,602 | 200 | 41,406 | 6,204 | 35,202 | 153,232 |
| 100 | 27,445 | 8,701  | 18,744 | 200,412 | 200 | 30,461 | 4,874 | 25,587 | 111,379 |
| 100 | 24,988 | 10,484 | 14,504 | 155,078 | 200 | 21,751 | 4,633 | 17,118 | 74,514  |
| 100 | 20,987 | 8,112  | 12,875 | 137,660 | 200 | 30,631 | 6,382 | 24,249 | 105,555 |
| 100 | 31,779 | 14,709 | 17,070 | 182,514 | 200 | 15,134 | 5,424 | 9,710  | 42,267  |
| 100 | 18,785 | 7,395  | 11,390 | 121,783 | 200 | 22,549 | 5,782 | 16,767 | 72,986  |
| 100 | 18,219 | 9,449  | 8,770  | 93,769  | 200 | 27,482 | 2,173 | 25,309 | 110,169 |
| 100 | 13,884 | 6,207  | 7,677  | 82,083  | 200 | 31,675 | 4,290 | 27,385 | 119,205 |
| 100 | 20,596 | 5,829  | 14,767 | 157,890 | 200 | 20,345 | 5,044 | 15,301 | 66,604  |
| 100 | 18,379 | 5,520  | 12,859 | 137,489 | 200 | 19,243 | 4,045 | 15,198 | 66,156  |
| 200 | 14,188 | 7,255  | 6,933  | 74,128  | 200 | 14,319 | 5,266 | 9,053  | 39,407  |
| 200 | 15,119 | 8,288  | 6,831  | 73,038  | 200 | 13,624 | 4,888 | 8,736  | 38,027  |
| 200 | 14,554 | 8,044  | 6,510  | 69,605  | 200 | 24,340 | 3,877 | 20,463 | 89,074  |
| 200 | 9,931  | 4,866  | 5,065  | 54,155  | 200 | 25,504 | 5,695 | 19,809 | 86,227  |
| 200 | 10,566 | 5,362  | 5,204  | 55,642  | 200 | 26,195 | 3,201 | 22,994 | 100,092 |
| 200 | 10,935 | 5,279  | 5,656  | 60,474  | 200 | 22,591 | 3,050 | 19,541 | 85,061  |
| 200 | 9,625  | 4,925  | 4,700  | 50,253  | 200 | 28,181 | 3,896 | 24,285 | 105,711 |
| 200 | 11,186 | 4,580  | 6,606  | 70,632  | 200 | 26,061 | 6,498 | 19,563 | 85,157  |
| 200 | 9,348  | 4,933  | 4,415  | 47,206  | 200 | 26,685 | 5,111 | 21,574 | 93,910  |
| 400 | 14,411 | 5,683  | 8,728  | 93,320  | 200 | 19,111 | 3,971 | 15,140 | 65,904  |
| 400 | 9,928  | 5,805  | 4,123  | 44,083  | 200 | 28,078 | 3,917 | 24,161 | 105,171 |
| 400 | 11,566 | 3,760  | 7,806  | 83,462  | 200 | 15,814 | 2,954 | 12,860 | 55,979  |
| 400 | 16,131 | 5,860  | 10,271 | 109,818 | 200 | 21,626 | 4,406 | 17,220 | 74,958  |
| 400 | 20,192 | 8,292  | 11,900 | 127,236 | 200 | 18,999 | 4,853 | 14,146 | 61,577  |
| 400 | 13,129 | 7,430  | 5,699  | 60,934  | 200 | 27,217 | 3,397 | 23,820 | 103,687 |
| 400 | 11,262 | 5,664  | 5,598  | 59,854  | 200 | 20,179 | 1,961 | 18,218 | 79,302  |
| 400 | 19,138 | 7,942  | 11,196 | 119,708 | 200 | 26,354 | 3,882 | 22,472 | 97,819  |
| 400 | 15,743 | 6,961  | 8,782  | 93,898  | 200 | 14,966 | 4,029 | 10,937 | 47,608  |
| 400 | 15,252 | 7,262  | 7,990  | 85,430  | 200 | 17,528 | 2,959 | 14,569 | 63,418  |
| 400 | 22,410 | 7,795  | 14,615 | 156,265 | 200 | 18,817 | 3,966 | 14,851 | 64,646  |
| 400 | 13,821 | 7,605  | 6,216  | 66,462  | 200 | 16,543 | 3,640 | 12,903 | 56,166  |
| 400 | 18,386 | 6,299  | 12,087 | 129,235 | 200 | 14,555 | 3,745 | 10,810 | 47,055  |
| 400 | 13,338 | 6,528  | 6,810  | 72,813  | 200 | 23,763 | 3,243 | 20,520 | 89,322  |
| 400 | 13,912 | 5,145  | 8,767  | 93,737  | 200 | 21,714 | 3,638 | 18,076 | 78,684  |
|     |        |        |        |         | 200 | 15,718 | 3,453 | 12,265 | 53,389  |
|     |        |        |        |         | 200 | 17,108 | 3,740 | 13,368 | 58,190  |
|     |        |        |        |         | 200 | 12,480 | 3,378 | 9,102  | 39,620  |
|     |        |        |        |         | 200 | 20,131 | 4,383 | 15,748 | 68,550  |
|     |        |        |        |         | 200 | 22,674 | 4,317 | 18,357 | 79,907  |
|     |        |        |        |         | 200 | 13,125 | 5,464 | 7,661  | 33,348  |
|     |        |        |        |         | 200 | 19,224 | 4,577 | 14,647 | 63,758  |
|     |        |        |        |         | 200 | 18,624 | 4,489 | 14,135 | 61,529  |
|     |        |        |        |         | 200 | 34,321 | 6,763 | 27,558 | 119,958 |
|     |        |        |        |         | 200 | 26,472 | 5,673 | 20,799 | 90,537  |
|     |        |        |        |         | 200 | 34,236 | 4,817 | 29,419 | 128,059 |
|     |        |        |        |         | 200 | 27,612 | 6,775 | 20,837 | 90,702  |
|     |        |        |        |         | 200 | 21,492 | 4,336 | 17,156 | 74,679  |
|     |        |        |        |         | 200 | 24,461 | 6,335 | 18,126 | 78,901  |
|     |        |        |        |         | 200 | 31,946 | 8,703 | 23,243 | 101,175 |
|     |        |        |        |         | 200 | 18,476 | 7,980 | 10,496 | 45,688  |
|     |        |        |        |         | 200 | 18,697 | 6,839 | 11,858 | 51,617  |
|     |        |        |        |         | 200 | 28,356 | 6,178 | 22,178 | 96,540  |
|     |        |        |        |         | 400 | 22,265 | 6,926 | 15,339 | 66,770  |
|     |        |        |        |         | 400 | 21,776 | 6,624 | 15,152 | 65,956  |
|     |        |        |        |         | 400 | 20,843 | 3,533 | 17,310 | 75,349  |
|     |        |        |        |         | 400 | 26,616 | 5,526 | 21,090 | 91,804  |
|     |        |        |        |         | 400 | 24,773 | 4,868 | 19,905 | 86,645  |
|     |        |        |        |         | 400 | 25,523 | 5,264 | 20,259 | 88,186  |
|     |        |        |        |         | 400 | 29,491 | 6,718 | 22,773 | 99,130  |
|     |        |        |        |         | 400 | 26,674 | 4,174 | 22,500 | 97,941  |
|     |        |        |        |         | 400 | 19,995 | 9,516 | 10,479 | 112,042 |
|     |        |        |        |         | 400 | 12,108 | 5,272 | 6,836  | 73,091  |
|     |        |        |        |         | 400 | 11,658 | 5,481 | 6,177  | 66,045  |
|     |        |        |        |         | 400 | 13,162 | 4,755 | 8,407  | 89,888  |
|     |        |        |        |         | 400 | 13,297 | 4,763 | 8,534  | 91,246  |
|     |        |        |        |         | 400 | 12,967 | 4,846 | 8,121  | 86,830  |
|     |        |        |        |         | 400 | 15,063 | 6,119 | 8,944  | 95,630  |
|     |        |        |        |         | 400 | 22,467 | 7,462 | 15,005 | 160,435 |

| NacGal | RI     | BKG   | RI-BKG | RI%     |
|--------|--------|-------|--------|---------|
| 0      | 22,382 | 8,432 | 13,950 | 149,154 |
| 0      | 21,508 | 8,015 | 13,493 | 144,268 |
| 0      | 23,600 | 6,682 | 16,918 | 180,889 |
| 0      | 20,449 | 9,659 | 10,790 | 115,367 |
| 0      | 9,615  | 6,040 | 3,575  | 38,224  |
| 0      | 9,709  | 5,804 | 3,905  | 41,753  |
| 0      | 16,132 | 6,525 | 9,607  | 102,719 |
| 0      | 12,766 | 9,393 | 3,373  | 36,064  |
| 0      | 15,977 | 6,006 | 9,971  | 106,611 |
| 0      | 12,637 | 4,820 | 7,817  | 83,580  |
| 0      | 15,803 | 7,409 | 8,394  | 89,749  |
| 0      | 16,346 | 6,693 | 9,653  | 103,211 |
| 0      | 11,921 | 5,541 | 6,380  | 68,215  |
| 0      | 18,556 | 6,490 | 12,066 | 129,011 |
| 0      | 14,193 | 4,580 | 9,613  | 102,783 |
| 0      | 15,074 | 5,002 | 10,072 | 107,691 |
| 0      | 15,242 | 5,811 | 9,431  | 100,837 |
| 0      | 14,179 | 4,273 | 9,906  | 105,916 |
| 0      | 16,358 | 5,007 | 11,351 | 1       |

|     |        |       |       |        |     |        |       |        |         |     |        |        |        |         |
|-----|--------|-------|-------|--------|-----|--------|-------|--------|---------|-----|--------|--------|--------|---------|
| 400 | 14,547 | 1,728 | 12,82 | 55,27  | 0   | 13,095 | 4,517 | 8,578  | 91,717  | 400 | 25,101 | 7,860  | 17,241 | 75,049  |
| 400 | 22,044 | 1,593 | 20,45 | 88,18  | 0   | 18,860 | 5,455 | 13,405 | 143,327 | 400 | 26,701 | 3,621  | 23,080 | 100,466 |
| 400 | 42,317 | 1,04  | 41,28 | 177,98 | 0   | 14,429 | 5,074 | 9,355  | 100,024 | 400 | 20,139 | 4,948  | 15,191 | 66,126  |
| 400 | 5,986  | 0,845 | 5,14  | 22,17  | 0   | 12,826 | 6,837 | 5,989  | 64,035  | 400 | 21,176 | 3,305  | 17,871 | 77,791  |
| 400 | 12,443 | 1,216 | 11,23 | 48,41  | 50  | 16,694 | 6,208 | 10,486 | 112,117 | 400 | 17,955 | 3,681  | 14,274 | 62,134  |
| 400 | 12,512 | 1,295 | 11,22 | 48,37  | 50  | 11,982 | 6,829 | 5,153  | 55,096  | 400 | 34,978 | 5,352  | 29,626 | 128,960 |
| 400 | 10,288 | 1,406 | 8,88  | 38,30  | 50  | 14,467 | 4,758 | 9,709  | 103,809 | 400 | 17,695 | 5,639  | 12,056 | 52,479  |
| 400 | 16,145 | 2,015 | 14,13 | 60,93  | 50  | 15,347 | 7,772 | 7,575  | 80,992  | 400 | 18,327 | 5,088  | 13,239 | 57,629  |
| 400 | 22,119 | 2,624 | 19,50 | 84,06  | 50  | 18,191 | 6,438 | 11,753 | 125,664 | 400 | 35,197 | 1,437  | 33,760 | 146,955 |
| 400 | 50,298 | 2,036 | 48,26 | 208,10 | 50  | 19,966 | 6,784 | 13,182 | 140,943 | 400 | 32,624 | 5,761  | 26,863 | 116,933 |
| 400 | 49,336 | 1,97  | 47,37 | 204,23 | 50  | 17,284 | 8,646 | 8,638  | 92,358  | 400 | 24,713 | 4,686  | 20,027 | 87,176  |
| 400 | 26,113 | 2,001 | 24,11 | 103,97 | 50  | 11,180 | 5,504 | 5,676  | 60,688  | 400 | 16,054 | 3,585  | 12,469 | 54,277  |
| 400 | 12,801 | 2,294 | 10,51 | 45,30  | 50  | 12,574 | 5,287 | 7,287  | 77,913  | 400 | 22,228 | 3,891  | 18,337 | 79,820  |
| 400 | 24,378 | 2,67  | 21,71 | 93,60  | 50  | 15,179 | 4,695 | 10,484 | 112,096 | 400 | 29,946 | 3,103  | 26,843 | 116,846 |
| 400 | 22,245 | 2,348 | 19,90 | 85,79  | 50  | 11,796 | 4,676 | 7,120  | 76,128  | 400 | 27,071 | 4,950  | 22,121 | 96,291  |
| 400 | 15,005 | 2,648 | 12,36 | 53,28  | 50  | 11,175 | 4,991 | 6,184  | 66,120  | 400 | 27,277 | 4,701  | 22,576 | 98,272  |
| 400 | 23,676 | 2,949 | 20,73 | 89,37  | 50  | 18,367 | 9,156 | 9,211  | 98,485  | 400 | 21,021 | 4,399  | 16,622 | 72,355  |
| 400 | 42,262 | 2,559 | 39,70 | 171,19 | 50  | 13,373 | 6,700 | 6,673  | 71,348  | 400 | 21,622 | 4,673  | 16,949 | 73,778  |
| 400 | 11,726 | 2,765 | 8,96  | 38,64  | 50  | 10,276 | 4,171 | 6,105  | 65,275  | 400 | 19,866 | 3,247  | 16,619 | 72,342  |
| 400 | 46,18  | 2,299 | 43,88 | 189,21 | 50  | 13,123 | 5,250 | 7,873  | 84,179  | 400 | 24,897 | 5,290  | 19,607 | 85,348  |
| 400 | 22,566 | 2,404 | 20,16 | 86,93  | 50  | 14,729 | 9,193 | 5,536  | 59,191  | 400 | 17,515 | 6,180  | 11,335 | 49,341  |
| 400 | 31,884 | 2,589 | 29,30 | 126,31 | 50  | 15,861 | 6,127 | 9,734  | 104,077 | 400 | 25,995 | 6,408  | 19,587 | 85,261  |
| 400 | 13,724 | 2,737 | 10,99 | 47,37  | 50  | 11,983 | 5,836 | 6,147  | 65,724  | 400 | 25,249 | 4,478  | 20,771 | 90,415  |
| 400 | 8,746  | 2,571 | 6,18  | 26,63  | 50  | 18,306 | 8,069 | 10,237 | 109,455 | 400 | 16,846 | 5,387  | 11,459 | 49,880  |
| 400 | 14,616 | 1,784 | 12,83 | 55,33  | 50  | 17,065 | 4,690 | 12,375 | 132,314 | 400 | 28,705 | 5,754  | 22,951 | 99,904  |
| 400 | 38,426 | 1,979 | 36,45 | 157,15 | 50  | 14,428 | 8,090 | 6,338  | 67,766  | 400 | 15,761 | 5,867  | 9,894  | 43,068  |
| 400 | 12,456 | 2,81  | 9,65  | 41,59  | 50  | 14,982 | 4,838 | 10,144 | 108,460 | 400 | 23,717 | 4,290  | 19,427 | 84,565  |
| 400 | 32,883 | 3,108 | 29,78 | 128,38 | 50  | 17,887 | 7,216 | 10,671 | 114,095 | 400 | 33,033 | 7,071  | 25,962 | 113,011 |
| 400 | 8,573  | 2,73  | 5,84  | 25,19  | 100 | 9,941  | 4,923 | 5,018  | 53,653  | 400 | 26,153 | 6,913  | 19,240 | 83,751  |
| 400 | 7,598  | 2,173 | 5,43  | 23,39  | 100 | 14,936 | 5,479 | 9,457  | 101,115 | 400 | 33,708 | 10,777 | 22,931 | 99,817  |
| 400 | 11,158 | 2,411 | 8,75  | 37,72  | 100 | 11,350 | 4,384 | 6,966  | 74,481  | 400 | 32,845 | 8,431  | 24,414 | 106,273 |
| 400 | 11,945 | 2,069 | 9,88  | 42,58  | 100 | 11,807 | 4,658 | 7,149  | 76,438  | 400 | 28,276 | 5,609  | 22,667 | 98,668  |
| 400 | 16,136 | 2,417 | 13,72 | 59,15  | 100 | 13,141 | 3,300 | 9,841  | 105,221 | 400 | 30,733 | 4,423  | 26,310 | 114,526 |
| 400 | 13,961 | 1,515 | 12,45 | 53,66  | 100 | 14,013 | 4,136 | 9,877  | 105,606 | 400 | 27,766 | 3,355  | 24,411 | 106,260 |
| 400 | 10,356 | 1,606 | 8,75  | 37,73  | 100 | 15,054 | 6,327 | 8,727  | 93,310  | 400 | 25,998 | 8,524  | 17,474 | 76,063  |
| 400 | 11,122 | 1,406 | 9,72  | 41,89  | 100 | 11,835 | 3,254 | 8,581  | 91,749  | 400 | 20,333 | 6,672  | 13,661 | 59,466  |
| 400 | 17,153 | 1,888 | 15,27 | 65,82  | 100 | 10,660 | 2,784 | 7,876  | 84,211  | 800 | 22,605 | 2,445  | 20,160 | 87,755  |
| 400 | 51,61  | 1,961 | 49,65 | 214,08 | 100 | 13,835 | 3,847 | 9,988  | 106,792 | 800 | 16,507 | 1,630  | 14,877 | 64,759  |
| 400 | 18,405 | 2,16  | 16,25 | 70,05  | 100 | 12,132 | 2,573 | 9,559  | 102,206 | 800 | 22,015 | 2,888  | 19,127 | 83,259  |
| 400 | 31,475 | 2,343 | 29,13 | 125,61 | 100 | 10,542 | 2,473 | 8,069  | 86,274  | 800 | 21,152 | 3,182  | 17,970 | 78,222  |
| 400 | 32,755 | 2,342 | 30,41 | 131,14 | 100 | 12,746 | 7,606 | 5,140  | 54,957  | 800 | 18,708 | 2,971  | 15,737 | 68,502  |
| 400 | 31,201 | 2,002 | 29,20 | 125,90 | 200 | 22,015 | 8,864 | 13,151 | 140,611 | 800 | 22,605 | 2,769  | 19,836 | 86,345  |
| 400 | 56,406 | 2,022 | 54,38 | 234,49 | 200 | 14,918 | 5,402 | 9,516  | 101,746 | 800 | 19,318 | 2,933  | 16,385 | 71,323  |
| 400 | 30,363 | 1,814 | 28,55 | 123,10 | 200 | 21,004 | 9,694 | 11,310 | 120,927 | 800 | 21,581 | 3,344  | 18,237 | 79,385  |
| 400 | 27,38  | 2,323 | 25,06 | 108,04 | 200 | 17,844 | 7,697 | 10,147 | 108,492 | 800 | 20,220 | 3,077  | 17,143 | 74,622  |
| 400 | 28,05  | 1,914 | 26,14 | 112,69 | 200 | 14,419 | 7,453 | 6,966  | 74,481  | 800 | 21,445 | 1,848  | 19,597 | 85,305  |
| 400 | 49,76  | 1,747 | 48,01 | 207,02 | 200 | 11,021 | 4,734 | 6,287  | 67,221  | 800 | 10,651 | 3,256  | 7,395  | 32,190  |
| 400 | 21,207 | 2,057 | 19,15 | 82,57  | 200 | 11,305 | 6,645 | 4,660  | 49,825  | 800 | 12,278 | 3,817  | 8,461  | 36,830  |
| 400 | 14,302 | 1,901 | 12,40 | 53,47  | 200 | 17,974 | 8,477 | 9,497  | 101,543 | 800 | 9,751  | 3,022  | 6,729  | 29,291  |
| 400 | 18,593 | 1,917 | 16,68 | 71,90  | 200 | 14,045 | 5,223 | 8,822  | 94,325  | 800 | 10,072 | 2,630  | 7,442  | 32,395  |
| 400 | 54,728 | 1,065 | 53,66 | 231,39 | 200 | 23,618 | 5,774 | 17,844 | 190,789 | 800 | 12,751 | 1,760  | 10,991 | 47,843  |
| 400 | 14,214 | 1,795 | 12,42 | 53,55  | 200 | 18,297 | 4,417 | 13,880 | 148,406 | 800 | 10,072 | 1,936  | 8,136  | 35,416  |
| 400 | 32,182 | 1,704 | 30,48 | 131,42 | 200 | 18,280 | 4,244 | 14,036 | 150,074 | 800 | 9,817  | 2,002  | 7,815  | 34,018  |
| 400 | 46,297 | 1,369 | 44,93 | 193,72 | 200 | 19,120 | 4,190 | 14,930 | 159,633 | 800 | 11,596 | 1,392  | 10,204 | 44,417  |
| 400 | 30,49  | 1,173 | 29,32 | 126,41 | 200 | 24,302 | 3,697 | 20,605 | 220,310 | 800 | 13,087 | 1,543  | 11,544 | 50,250  |
| 400 | 18,219 | 2,153 | 16,07 | 69,27  | 200 | 17,307 | 9,711 | 7,596  | 81,217  | 800 | 10,877 | 2,154  | 8,723  | 37,971  |
| 400 | 23,763 | 1,826 | 21,94 | 94,59  | 400 | 12,286 | 5,264 | 7,022  | 75,080  | 800 | 17,440 | 2,122  | 15,318 | 66,678  |
| 400 | 8,683  | 1,67  | 7,01  | 30,24  | 400 | 14,055 | 3,904 | 10,151 | 108,535 | 800 | 23,208 | 2,355  | 20,853 | 90,772  |
| 400 | 9,485  | 1,797 | 7,69  | 33,15  | 400 | 11,686 | 4,827 | 6,859  | 73,337  | 800 | 18,239 | 2,301  | 15,938 | 69,377  |
| 400 | 12,383 | 1,626 | 10,76 | 46,38  | 400 | 12,233 | 5,548 | 6,685  | 71,477  | 800 | 17,732 | 2,265  | 15,467 | 67,327  |
| 400 | 20,972 | 2,041 | 18,93 | 81,63  | 400 | 13,533 | 4,952 | 8,581  | 91,749  | 800 | 12,184 | 3,474  | 8,710  | 37,914  |
| 800 | 16,76  | 1,252 | 15,51 | 66,87  | 400 | 15,556 | 6,039 | 9,517  | 101,756 | 800 | 21,343 | 3,063  | 18,280 | 79,572  |
| 800 | 10,111 | 1,322 | 8,79  | 37,90  | 400 | 10,572 | 5,078 | 5,494  | 58,742  | 800 | 15,126 | 3,305  | 11,821 | 51,456  |
| 800 | 21,666 | 1,113 | 20,55 | 88,62  | 400 | 16,097 | 7,093 | 9,004  | 96,271  | 800 | 18,864 | 3,572  | 15,292 | 66,565  |
| 800 | 14,522 | 1,68  | 12,84 | 55,37  | 400 | 13,598 | 6,406 | 7,192  | 76,897  | 800 | 23,168 | 4,282  | 18,886 | 82,210  |
| 800 | 16,691 | 1,565 | 15,13 | 65,22  | 400 | 11,786 | 4,788 | 6,998  | 74,823  | 800 | 20,699 | 5,233  | 15,466 | 67,323  |
| 800 | 32,728 | 0,74  | 31,99 | 137,93 | 400 | 10,571 | 4,415 | 6,156  | 65,820  | 800 | 19,827 | 2,896  | 16,931 | 73,700  |
| 800 | 28,305 | 1,091 | 27,21 | 117,34 | 400 | 10,023 | 4,181 | 5,842  | 62,463  | 800 | 18,208 | 3,199  | 15,009 | 65,333  |
| 800 | 8,962  | 0,996 | 7,97  | 34,35  | 400 | 9,697  | 3,611 | 6,086  | 65,072  | 800 | 18,434 | 4,405  | 14,029 | 61,067  |
| 800 | 17,025 | 1,404 | 15,62 | 67,35  | 400 | 9,869  | 3,308 | 6,561  | 70,151  | 800 | 17,244 | 3,928  | 13,316 | 57,964  |
| 800 | 27,389 | 1,562 | 25,83 | 111,36 | 400 | 16,707 | 6,844 | 9,863  | 105,456 | 800 | 20,500 | 3,980  | 16,520 | 71,911  |

|     |        |       |       |        |
|-----|--------|-------|-------|--------|
| 800 | 9,484  | 1,163 | 8,32  | 35,88  |
| 800 | 18,05  | 2,851 | 15,20 | 65,54  |
| 800 | 44,958 | 4,504 | 40,45 | 174,43 |
| 800 | 12,4   | 4,495 | 7,91  | 34,08  |
| 800 | 38,767 | 3,652 | 35,12 | 151,41 |
| 800 | 20,868 | 3,635 | 17,23 | 74,31  |
| 800 | 31,144 | 3,655 | 27,49 | 118,53 |
| 800 | 49,117 | 3,239 | 45,88 | 197,82 |
| 800 | 27,047 | 3,358 | 23,69 | 102,14 |
| 800 | 14,978 | 3,577 | 11,40 | 49,16  |
| 800 | 33,125 | 3,209 | 29,92 | 128,99 |
| 800 | 20,018 | 3,276 | 16,74 | 72,19  |
| 800 | 34,018 | 2,736 | 31,28 | 134,88 |
| 800 | 25,523 | 3,199 | 22,32 | 96,26  |
| 800 | 19,854 | 3,335 | 16,52 | 71,23  |
| 800 | 28,003 | 2,885 | 25,12 | 108,30 |
| 800 | 16,375 | 2,418 | 13,96 | 60,18  |
| 800 | 10,05  | 1,608 | 8,44  | 36,40  |
| 800 | 13,099 | 3,094 | 10,01 | 43,14  |
| 800 | 5,026  | 1,929 | 3,10  | 13,35  |
| 800 | 42,86  | 1,844 | 41,02 | 176,85 |
| 800 | 11,592 | 2,899 | 8,69  | 37,48  |
| 800 | 21,87  | 3,386 | 18,48 | 79,70  |
| 800 | 25,325 | 3,75  | 21,58 | 93,03  |
| 800 | 26,073 | 2,236 | 23,84 | 102,78 |
| 800 | 22,979 | 4,13  | 18,85 | 81,27  |
| 800 | 15,5   | 3,075 | 12,43 | 53,57  |
| 800 | 12,867 | 1,773 | 11,09 | 47,84  |
| 800 | 9,253  | 2,158 | 7,10  | 30,59  |
| 800 | 13,985 | 2,223 | 11,76 | 50,72  |
| 800 | 17,194 | 1,04  | 16,15 | 69,65  |
| 800 | 13,785 | 2,705 | 11,08 | 47,77  |
| 800 | 6,23   | 1,513 | 4,72  | 20,34  |

| Fru | IM CA  | IM BKG | CA-BKG | RI%    |
|-----|--------|--------|--------|--------|
| 0   | 17,941 | 1,18   | 16,76  | 72,27  |
| 0   | 14,896 | 1,56   | 13,34  | 57,50  |
| 0   | 20,267 | 1,105  | 19,16  | 82,62  |
| 0   | 11,695 | 1,155  | 10,54  | 45,45  |
| 0   | 12,994 | 1,099  | 11,90  | 51,29  |
| 0   | 18,422 | 1,117  | 17,31  | 74,62  |
| 0   | 25,79  | 1,451  | 24,34  | 104,95 |
| 0   | 15,103 | 1,297  | 13,81  | 59,53  |
| 0   | 34,569 | 1,484  | 33,09  | 142,66 |
| 0   | 14,138 | 0,489  | 13,65  | 58,85  |
| 0   | 15,875 | 1,945  | 13,93  | 60,06  |
| 0   | 20,7   | 1,872  | 18,83  | 81,18  |
| 0   | 11,954 | 1,578  | 10,38  | 44,74  |
| 0   | 20,754 | 1,861  | 18,89  | 81,46  |
| 0   | 50,282 | 2,711  | 47,57  | 205,12 |
| 0   | 33,745 | 1,545  | 32,20  | 138,84 |
| 0   | 13,889 | 0,578  | 13,31  | 57,39  |
| 0   | 22,582 | 1,208  | 21,37  | 92,16  |
| 0   | 14,618 | 1,033  | 13,59  | 58,58  |
| 0   | 11,554 | 1,565  | 9,99   | 43,07  |
| 0   | 11,569 | 1,34   | 10,23  | 44,11  |
| 0   | 23,41  | 1,023  | 22,39  | 96,53  |
| 0   | 33,797 | 0,963  | 32,83  | 141,57 |
| 0   | 26,289 | 0,954  | 25,34  | 109,24 |
| 0   | 10,437 | 1,078  | 9,36   | 40,35  |
| 0   | 21,082 | 0,836  | 20,25  | 87,30  |
| 0   | 8,763  | 1,164  | 7,60   | 32,77  |
| 0   | 37,612 | 1,234  | 36,38  | 156,86 |
| 0   | 16,769 | 1,149  | 15,62  | 67,35  |
| 0   | 29,258 | 1,343  | 27,92  | 120,36 |
| 0   | 11,666 | 1,115  | 10,55  | 45,49  |
| 0   | 25,676 | 0,895  | 24,78  | 106,85 |
| 0   | 39,99  | 1,282  | 38,71  | 166,90 |
| 0   | 18,783 | 1,742  | 17,04  | 73,48  |
| 0   | 25,57  | 2,058  | 23,51  | 101,38 |
| 0   | 12,614 | 2,737  | 9,88   | 42,59  |

|     |        |       |        |         |
|-----|--------|-------|--------|---------|
| 400 | 14,301 | 5,732 | 8,569  | 91,620  |
| 400 | 10,358 | 3,086 | 7,272  | 77,753  |
| 400 | 9,802  | 6,226 | 3,576  | 38,235  |
| 400 | 11,287 | 3,526 | 7,761  | 82,981  |
| 400 | 9,457  | 4,541 | 4,916  | 52,562  |
| 400 | 16,649 | 8,353 | 8,296  | 88,701  |
| 400 | 16,258 | 7,501 | 8,757  | 93,630  |
| 400 | 12,723 | 4,732 | 7,991  | 85,440  |
| 400 | 14,878 | 4,565 | 10,313 | 110,267 |
| 400 | 10,947 | 4,331 | 6,616  | 70,739  |
| 400 | 13,434 | 4,187 | 9,247  | 98,870  |
| 400 | 9,665  | 5,112 | 4,553  | 48,681  |
| 400 | 14,193 | 5,065 | 9,128  | 97,597  |
| 400 | 15,829 | 7,501 | 8,328  | 89,044  |

|     |        |       |        |         |
|-----|--------|-------|--------|---------|
| 800 | 13,296 | 4,985 | 8,311  | 36,177  |
| 800 | 16,757 | 3,792 | 12,965 | 56,436  |
| 800 | 18,277 | 2,308 | 15,969 | 69,512  |
| 800 | 21,241 | 3,585 | 17,656 | 76,856  |
| 800 | 9,002  | 3,630 | 5,372  | 23,384  |
| 800 | 16,095 | 5,047 | 11,048 | 48,091  |
| 800 | 19,391 | 4,165 | 15,226 | 66,278  |
| 800 | 23,096 | 6,021 | 17,075 | 74,326  |
| 800 | 28,171 | 5,703 | 22,468 | 97,802  |
| 800 | 19,550 | 6,087 | 13,463 | 58,604  |
| 800 | 16,017 | 7,035 | 8,982  | 39,098  |
| 800 | 16,343 | 5,993 | 10,350 | 45,053  |
| 800 | 30,527 | 5,933 | 24,594 | 107,056 |
| 800 | 12,302 | 5,934 | 6,368  | 27,720  |
| 800 | 18,663 | 4,516 | 14,147 | 61,581  |
| 800 | 14,313 | 5,313 | 9,000  | 39,176  |
| 800 | 10,916 | 5,622 | 5,294  | 23,044  |
| 800 | 9,989  | 3,698 | 6,291  | 27,384  |
| 800 | 15,515 | 4,277 | 11,238 | 48,918  |
| 800 | 16,104 | 3,945 | 12,159 | 52,927  |
| 800 | 12,787 | 4,966 | 7,821  | 34,044  |

| NACGal | RI     | BKG    | RI-BKG | RI%     |
|--------|--------|--------|--------|---------|
| 0      | 42,915 | 4,513  | 38,402 | 167,162 |
| 0      | 39,957 | 2,552  | 37,405 | 162,822 |
| 0      | 36,092 | 5,212  | 30,880 | 134,419 |
| 0      | 27,120 | 6,067  | 21,053 | 91,643  |
| 0      | 28,937 | 4,353  | 24,584 | 107,013 |
| 0      | 32,143 | 3,571  | 28,572 | 124,372 |
| 0      | 32,805 | 3,783  | 29,022 | 126,331 |
| 0      | 53,870 | 5,367  | 48,503 | 211,131 |
| 0      | 40,904 | 6,247  | 34,657 | 150,860 |
| 0      | 41,614 | 5,428  | 36,186 | 157,516 |
| 0      | 43,696 | 7,158  | 36,538 | 159,048 |
| 0      | 36,065 | 9,731  | 26,334 | 114,630 |
| 0      | 37,297 | 6,909  | 30,388 | 132,277 |
| 0      | 46,197 | 7,851  | 38,346 | 166,918 |
| 0      | 35,676 | 8,219  | 27,457 | 119,519 |
| 0      | 47,154 | 9,385  | 37,769 | 164,406 |
| 0      | 45,699 | 8,205  | 37,494 | 163,209 |
| 0      | 37,990 | 7,530  | 30,460 | 132,591 |
| 0      | 38,982 | 9,165  | 29,817 | 129,792 |
| 0      | 44,030 | 10,100 | 33,930 | 147,695 |
| 0      | 42,055 | 10,479 | 31,576 | 137,449 |
| 0      | 53,660 | 8,190  | 45,470 | 197,928 |
| 0      | 51,363 | 6,648  | 44,715 | 194,642 |
| 0      | 30,309 | 4,286  | 26,023 | 113,277 |
| 0      | 23,766 | 4,046  | 19,720 | 85,840  |
| 0      | 23,453 | 2,295  | 21,158 | 92,100  |
| 0      | 15,243 | 2,882  | 12,361 | 53,807  |
| 0      | 24,894 | 5,156  | 19,738 | 85,918  |
| 0      | 15,333 | 2,477  | 12,856 | 55,961  |
| 0      | 17,837 | 2,084  | 15,753 | 68,572  |
| 0      | 14,546 | 2,781  | 11,765 | 51,212  |
| 0      | 13,537 | 2,126  | 11,411 | 49,671  |
| 0      | 14,326 | 3,333  | 10,993 | 47,852  |
| 0      | 16,654 | 3,064  | 13,590 | 59,156  |
| 0      | 32,633 | 1,633  | 31,000 | 134,941 |
| 0      | 13,344 | 1,741  | 11,603 | 50,507  |
| 0      | 40,344 | 1,188  | 39,156 | 170,444 |
| 0      | 12,527 | 3,525  | 9,002  | 39,185  |
| 0      | 15,938 | 2,669  | 13,269 | 57,759  |
| 0      | 31,163 | 3,314  | 27,849 | 121,225 |
| 0      | 11,462 | 3,787  | 7,675  | 33,409  |
| 0      | 16,386 | 2,061  | 14,325 | 62,356  |
| 0      | 18,724 | 3,478  | 15,246 | 66,365  |
| 0      | 13,865 | 4,694  | 9,171  | 39,921  |
| 0      | 20,533 | 2,990  | 17,543 | 76,364  |
| 0      | 17,891 | 4,825  | 13,066 | 56,876  |
| 0      | 16,924 | 3,168  | 13,756 | 59,879  |
| 0      | 18,865 | 3,561  | 15,304 | 66,617  |

|    |        |       |       |        |
|----|--------|-------|-------|--------|
| 0  | 21,087 | 2,11  | 18,98 | 81,83  |
| 0  | 14,029 | 2,346 | 11,68 | 50,37  |
| 0  | 32,361 | 2,698 | 29,66 | 127,90 |
| 0  | 56,725 | 2,782 | 53,94 | 232,59 |
| 0  | 33,573 | 3,201 | 30,37 | 130,96 |
| 0  | 33,655 | 2,61  | 31,05 | 133,86 |
| 0  | 29,996 | 2,314 | 27,68 | 119,36 |
| 0  | 11,177 | 3,027 | 8,15  | 35,14  |
| 0  | 13,892 | 2,485 | 11,41 | 49,18  |
| 0  | 25,12  | 1,968 | 23,15 | 99,83  |
| 0  | 46,437 | 3,573 | 42,86 | 184,82 |
| 0  | 20,731 | 3,009 | 17,72 | 76,41  |
| 0  | 9,836  | 3,021 | 6,82  | 29,39  |
| 0  | 16,517 | 3,006 | 13,51 | 58,26  |
| 0  | 16,476 | 3,002 | 13,47 | 58,10  |
| 0  | 23,276 | 1,756 | 21,52 | 92,79  |
| 0  | 24,742 | 3,614 | 21,13 | 91,10  |
| 0  | 36,92  | 3,432 | 33,49 | 144,39 |
| 0  | 41,23  | 2,566 | 38,66 | 166,71 |
| 0  | 63,491 | 6,917 | 56,57 | 243,94 |
| 0  | 59,866 | 5,125 | 54,74 | 236,03 |
| 0  | 52,024 | 5,227 | 46,80 | 201,78 |
| 0  | 41,031 | 5,574 | 35,46 | 152,88 |
| 0  | 55,864 | 3,74  | 52,12 | 224,75 |
| 0  | 28,138 | 8,195 | 19,94 | 85,99  |
| 0  | 11,069 | 2,234 | 8,84  | 38,09  |
| 0  | 35,684 | 2,027 | 33,66 | 145,12 |
| 0  | 17,196 | 2,599 | 14,60 | 62,94  |
| 50 | 34,647 | 1,773 | 32,87 | 141,75 |
| 50 | 41,209 | 1,446 | 39,76 | 171,45 |
| 50 | 14,985 | 1,635 | 13,35 | 57,56  |
| 50 | 10,998 | 1,307 | 9,69  | 41,79  |
| 50 | 30,992 | 1,35  | 29,64 | 127,81 |
| 50 | 15,083 | 1,072 | 14,01 | 60,41  |
| 50 | 19,758 | 1,442 | 18,32 | 78,98  |
| 50 | 8,63   | 1,399 | 7,23  | 31,18  |
| 50 | 16,315 | 1,473 | 14,84 | 64,00  |
| 50 | 11,755 | 1,124 | 10,63 | 45,84  |
| 50 | 11,849 | 1,112 | 10,74 | 46,30  |
| 50 | 6,263  | 0,916 | 5,35  | 23,06  |
| 50 | 6,511  | 1,117 | 5,39  | 23,26  |
| 50 | 16,901 | 1,349 | 15,55 | 67,06  |
| 50 | 7,501  | 1,21  | 6,29  | 27,13  |
| 50 | 8,028  | 1,66  | 6,37  | 27,46  |
| 50 | 34,68  | 2,081 | 32,60 | 140,56 |
| 50 | 19,723 | 1,994 | 17,73 | 76,44  |
| 50 | 31,979 | 2,01  | 29,97 | 129,22 |
| 50 | 12,404 | 1,593 | 10,81 | 46,62  |
| 50 | 20,558 | 1,516 | 19,04 | 82,11  |
| 50 | 49,049 | 1,192 | 47,86 | 206,35 |
| 50 | 24,657 | 2,097 | 22,56 | 97,27  |
| 50 | 24,314 | 1,539 | 22,78 | 98,20  |
| 50 | 22,499 | 0,932 | 21,57 | 92,99  |
| 50 | 17,644 | 1,048 | 16,60 | 71,56  |
| 50 | 22,918 | 1,642 | 21,28 | 91,74  |
| 50 | 18,303 | 1,432 | 16,87 | 72,74  |
| 50 | 32,762 | 1,552 | 31,21 | 134,57 |
| 50 | 15,679 | 1,112 | 14,57 | 62,81  |
| 50 | 11,272 | 1,258 | 10,01 | 43,18  |
| 50 | 16,542 | 1,224 | 15,32 | 66,05  |
| 50 | 9,109  | 1,155 | 7,95  | 34,30  |
| 50 | 24,027 | 2,387 | 21,64 | 93,31  |
| 50 | 40,64  | 1,735 | 38,91 | 167,75 |
| 50 | 45,789 | 2,128 | 43,66 | 188,26 |
| 50 | 16,35  | 1,854 | 14,50 | 62,50  |
| 50 | 17,139 | 1,635 | 15,50 | 66,85  |
| 50 | 35,435 | 1,254 | 34,18 | 147,38 |
| 50 | 11,197 | 2,076 | 9,12  | 39,33  |
| 50 | 16,571 | 1,653 | 14,92 | 64,32  |
| 50 | 43,624 | 1,832 | 41,79 | 180,20 |
| 50 | 9,976  | 1,441 | 8,54  | 36,80  |

|     |        |        |        |         |
|-----|--------|--------|--------|---------|
| 0   | 21,331 | 4,162  | 17,169 | 74,736  |
| 0   | 13,112 | 3,531  | 9,581  | 41,706  |
| 0   | 15,574 | 3,393  | 12,181 | 53,023  |
| 0   | 16,971 | 3,737  | 13,234 | 57,607  |
| 0   | 21,624 | 5,423  | 16,201 | 70,522  |
| 0   | 23,649 | 3,160  | 20,489 | 89,187  |
| 0   | 19,076 | 3,626  | 15,450 | 67,253  |
| 0   | 19,432 | 3,067  | 16,365 | 71,236  |
| 0   | 19,564 | 3,328  | 16,236 | 70,674  |
| 0   | 15,393 | 2,849  | 12,544 | 54,603  |
| 0   | 16,921 | 1,865  | 15,056 | 65,538  |
| 0   | 17,087 | 1,453  | 15,634 | 68,054  |
| 0   | 19,090 | 1,380  | 17,710 | 77,091  |
| 0   | 19,247 | 1,363  | 17,884 | 77,848  |
| 0   | 16,313 | 1,479  | 14,834 | 64,572  |
| 0   | 18,059 | 2,148  | 15,911 | 69,260  |
| 0   | 15,306 | 2,310  | 12,996 | 56,571  |
| 0   | 23,454 | 1,839  | 21,615 | 94,089  |
| 0   | 20,599 | 2,669  | 17,930 | 78,048  |
| 0   | 20,479 | 2,977  | 17,502 | 76,185  |
| 0   | 18,891 | 3,106  | 15,785 | 68,711  |
| 0   | 22,223 | 2,763  | 19,460 | 84,708  |
| 0   | 23,612 | 2,363  | 21,249 | 92,496  |
| 0   | 28,341 | 2,493  | 25,848 | 112,515 |
| 0   | 35,218 | 3,208  | 32,010 | 139,338 |
| 0   | 32,632 | 1,403  | 31,229 | 135,938 |
| 0   | 23,178 | 2,211  | 20,967 | 91,268  |
| 0   | 20,551 | 2,243  | 18,308 | 79,694  |
| 0   | 35,758 | 1,502  | 34,256 | 149,114 |
| 0   | 30,611 | 2,977  | 27,634 | 120,289 |
| 0   | 41,917 | 2,507  | 39,410 | 171,549 |
| 0   | 32,909 | 2,535  | 30,374 | 132,216 |
| 0   | 32,440 | 2,646  | 29,794 | 129,692 |
| 0   | 27,690 | 4,319  | 23,371 | 101,733 |
| 0   | 25,613 | 3,593  | 22,020 | 95,852  |
| 0   | 24,657 | 3,910  | 20,747 | 90,311  |
| 0   | 28,620 | 3,511  | 25,109 | 109,298 |
| 0   | 33,412 | 4,721  | 28,691 | 124,890 |
| 200 | 44,671 | 3,638  | 41,033 | 178,614 |
| 200 | 32,260 | 6,467  | 25,793 | 112,277 |
| 200 | 9,845  | 2,600  | 7,245  | 31,537  |
| 200 | 30,531 | 4,106  | 26,425 | 115,026 |
| 200 | 37,267 | 5,606  | 31,661 | 137,819 |
| 200 | 31,259 | 6,191  | 25,068 | 109,118 |
| 200 | 32,043 | 4,660  | 27,383 | 119,198 |
| 200 | 30,516 | 7,247  | 23,269 | 101,291 |
| 200 | 16,323 | 5,076  | 11,247 | 48,956  |
| 200 | 32,449 | 6,036  | 26,413 | 114,972 |
| 200 | 15,557 | 5,809  | 9,748  | 42,432  |
| 200 | 30,989 | 4,990  | 25,999 | 113,170 |
| 200 | 29,084 | 6,689  | 22,395 | 97,485  |
| 200 | 24,795 | 4,516  | 20,279 | 88,272  |
| 200 | 31,510 | 7,453  | 24,057 | 104,721 |
| 200 | 34,256 | 7,290  | 26,966 | 117,383 |
| 200 | 33,119 | 7,661  | 25,458 | 110,819 |
| 200 | 27,884 | 8,867  | 19,017 | 82,779  |
| 200 | 43,052 | 7,583  | 35,469 | 154,396 |
| 200 | 40,556 | 7,092  | 33,464 | 145,668 |
| 200 | 42,192 | 9,031  | 33,161 | 144,349 |
| 200 | 26,261 | 10,979 | 15,282 | 66,523  |
| 200 | 26,391 | 8,845  | 17,546 | 76,377  |
| 200 | 43,966 | 6,876  | 37,090 | 161,449 |
| 200 | 28,603 | 6,622  | 21,981 | 95,680  |
| 200 | 43,725 | 6,832  | 36,893 | 160,595 |
| 200 | 21,016 | 4,013  | 17,003 | 74,015  |
| 200 | 13,397 | 3,065  | 10,332 | 44,975  |
| 200 | 15,077 | 4,812  | 10,265 | 44,684  |
| 200 | 25,744 | 4,341  | 21,403 | 93,165  |
| 200 | 25,911 | 4,277  | 21,634 | 94,174  |
| 200 | 14,202 | 3,779  | 10,423 | 45,369  |
| 200 | 7,864  | 4,071  | 3,793  | 16,509  |

|     |        |       |       |        |
|-----|--------|-------|-------|--------|
| 50  | 22,131 | 1,902 | 20,23 | 87,22  |
| 50  | 8,749  | 1,786 | 6,96  | 30,02  |
| 50  | 28,845 | 1,182 | 27,66 | 119,28 |
| 50  | 46,852 | 1,605 | 45,25 | 195,10 |
| 50  | 40,415 | 2,231 | 38,18 | 164,64 |
| 50  | 49,292 | 2,313 | 46,98 | 202,56 |
| 50  | 58,277 | 1,868 | 56,41 | 243,23 |
| 50  | 59,296 | 1,875 | 57,42 | 247,59 |
| 50  | 39,535 | 2,066 | 37,47 | 161,56 |
| 50  | 39,71  | 4,426 | 35,28 | 152,14 |
| 50  | 12,04  | 1,271 | 10,77 | 46,43  |
| 50  | 17,666 | 1,344 | 16,32 | 70,38  |
| 50  | 30,268 | 1,689 | 28,58 | 123,23 |
| 50  | 14,57  | 1,662 | 12,91 | 55,66  |
| 50  | 9,24   | 1,046 | 8,19  | 35,33  |
| 50  | 40,717 | 1,203 | 39,51 | 170,38 |
| 100 | 11,568 | 1,148 | 10,42 | 44,93  |
| 100 | 20,507 | 0,99  | 19,52 | 84,15  |
| 100 | 18,936 | 1,228 | 17,71 | 76,35  |
| 100 | 17,526 | 1,227 | 16,30 | 70,28  |
| 100 | 12,45  | 1,424 | 11,03 | 47,54  |
| 100 | 23,351 | 2,483 | 20,87 | 89,98  |
| 100 | 17,602 | 1,066 | 16,54 | 71,30  |
| 100 | 9,754  | 1,56  | 8,19  | 35,33  |
| 100 | 7,743  | 1,299 | 6,44  | 27,79  |
| 100 | 8,492  | 0,5   | 7,99  | 34,46  |
| 100 | 19,395 | 0,842 | 18,55 | 80,00  |
| 100 | 17,644 | 1,093 | 16,55 | 71,36  |
| 100 | 17,008 | 1,924 | 15,08 | 65,04  |
| 100 | 30,959 | 4,121 | 26,84 | 115,72 |
| 100 | 31,229 | 2,669 | 28,56 | 123,15 |
| 100 | 20,008 | 1,989 | 18,02 | 77,69  |
| 100 | 31,457 | 2,549 | 28,91 | 124,65 |
| 100 | 33,626 | 2,543 | 31,08 | 134,02 |
| 100 | 24,81  | 1,295 | 23,52 | 101,39 |
| 100 | 23,749 | 1,824 | 21,93 | 94,54  |
| 100 | 21,501 | 2,125 | 19,38 | 83,55  |
| 100 | 33,213 | 1,361 | 31,85 | 137,34 |
| 100 | 27,849 | 2,402 | 25,45 | 109,72 |
| 100 | 33,635 | 2,128 | 31,51 | 135,85 |
| 100 | 26,527 | 2,027 | 24,50 | 105,64 |
| 100 | 20,616 | 1,634 | 18,98 | 81,85  |
| 100 | 40,529 | 1,683 | 38,85 | 167,50 |
| 100 | 40,637 | 1,902 | 38,74 | 167,02 |
| 100 | 21,907 | 1,985 | 19,92 | 85,90  |
| 100 | 15,844 | 2,335 | 13,51 | 58,25  |
| 100 | 37,714 | 2,083 | 35,63 | 153,63 |
| 100 | 28,402 | 2,327 | 26,08 | 112,43 |
| 100 | 7,877  | 2,139 | 5,74  | 24,74  |
| 100 | 24,643 | 3,314 | 21,33 | 91,97  |
| 100 | 11,84  | 1,361 | 10,48 | 45,18  |
| 100 | 9,155  | 0,974 | 8,18  | 35,27  |
| 100 | 48,605 | 5,386 | 43,22 | 186,35 |
| 100 | 33,419 | 8,117 | 25,30 | 109,10 |
| 100 | 17,745 | 3,13  | 14,62 | 63,02  |
| 100 | 21,259 | 3,238 | 18,02 | 77,70  |
| 100 | 20,073 | 2,273 | 17,80 | 76,75  |
| 100 | 24,236 | 3,31  | 20,93 | 90,23  |
| 100 | 10,282 | 2,898 | 7,38  | 31,84  |
| 100 | 12,622 | 2,4   | 10,22 | 44,08  |
| 100 | 30,504 | 1,632 | 28,87 | 124,49 |
| 100 | 22,69  | 2,031 | 20,66 | 89,08  |
| 100 | 9,663  | 2,62  | 7,04  | 30,37  |
| 100 | 20,617 | 1,473 | 19,14 | 82,55  |
| 100 | 19,658 | 1,497 | 18,16 | 78,31  |
| 100 | 18,423 | 1,472 | 16,95 | 73,09  |
| 100 | 19,407 | 1,292 | 18,12 | 78,11  |
| 100 | 27,576 | 2,921 | 24,66 | 106,31 |
| 100 | 7,649  | 1,225 | 6,42  | 27,70  |
| 100 | 8,881  | 1,292 | 7,59  | 32,72  |
| 100 | 6,655  | 1,421 | 5,23  | 22,57  |

|     |        |       |        |         |
|-----|--------|-------|--------|---------|
| 200 | 23,428 | 4,677 | 18,751 | 81,621  |
| 200 | 15,065 | 4,463 | 10,602 | 46,150  |
| 200 | 25,340 | 3,955 | 21,385 | 93,087  |
| 200 | 18,065 | 4,014 | 14,051 | 61,162  |
| 200 | 16,321 | 4,546 | 11,775 | 51,257  |
| 200 | 24,285 | 5,216 | 19,069 | 83,008  |
| 200 | 32,044 | 5,376 | 26,668 | 116,085 |
| 200 | 27,273 | 6,738 | 20,535 | 89,390  |
| 200 | 37,122 | 4,644 | 32,478 | 141,374 |
| 200 | 25,236 | 4,507 | 20,729 | 90,232  |
| 200 | 7,058  | 4,790 | 2,268  | 9,875   |
| 200 | 11,095 | 6,495 | 4,600  | 20,022  |
| 200 | 22,515 | 5,159 | 17,356 | 75,548  |
| 200 | 14,064 | 5,029 | 9,035  | 39,330  |
| 200 | 6,146  | 4,756 | 1,390  | 6,051   |
| 200 | 19,837 | 6,161 | 13,676 | 59,530  |
| 200 | 16,077 | 6,151 | 9,926  | 43,206  |
| 200 | 12,009 | 4,257 | 7,752  | 33,746  |
| 200 | 24,073 | 3,009 | 21,064 | 91,692  |
| 200 | 11,726 | 4,183 | 7,543  | 32,832  |
| 200 | 26,952 | 4,371 | 22,581 | 98,293  |
| 200 | 23,749 | 4,699 | 19,050 | 82,922  |
| 200 | 11,591 | 5,692 | 5,899  | 25,677  |
| 200 | 35,576 | 2,783 | 32,793 | 142,747 |
| 200 | 25,667 | 2,962 | 22,705 | 98,834  |
| 200 | 30,961 | 7,271 | 23,690 | 103,122 |
| 200 | 13,413 | 6,215 | 7,198  | 31,333  |
| 200 | 38,693 | 7,337 | 31,356 | 136,492 |
| 200 | 21,705 | 7,015 | 14,690 | 63,944  |
| 200 | 46,858 | 7,631 | 39,227 | 170,754 |
| 200 | 24,719 | 8,363 | 16,356 | 71,196  |
| 200 | 40,891 | 9,782 | 31,109 | 135,414 |
| 200 | 20,574 | 3,262 | 17,312 | 75,360  |
| 200 | 36,852 | 6,327 | 30,525 | 132,876 |
| 200 | 35,963 | 6,746 | 29,217 | 127,181 |
| 200 | 43,906 | 9,931 | 33,975 | 147,893 |
| 200 | 17,590 | 5,742 | 11,848 | 51,574  |
| 200 | 41,726 | 8,599 | 33,127 | 144,200 |
| 200 | 35,131 | 7,051 | 28,080 | 122,232 |
| 200 | 34,571 | 7,143 | 27,428 | 119,393 |
| 200 | 51,670 | 7,760 | 43,910 | 191,138 |
| 200 | 21,836 | 2,817 | 19,019 | 82,790  |
| 200 | 28,442 | 6,528 | 21,914 | 95,392  |
| 200 | 41,701 | 7,256 | 34,445 | 149,936 |
| 400 | 43,847 | 3,679 | 40,168 | 174,851 |
| 400 | 30,978 | 4,295 | 26,683 | 116,152 |
| 400 | 20,201 | 5,012 | 15,189 | 66,117  |
| 400 | 36,845 | 4,985 | 31,860 | 138,683 |
| 400 | 12,013 | 5,482 | 6,531  | 28,431  |
| 400 | 35,593 | 3,093 | 32,500 | 141,470 |
| 400 | 32,759 | 4,679 | 28,080 | 122,231 |
| 400 | 10,301 | 5,592 | 4,709  | 20,497  |
| 400 | 29,580 | 4,060 | 25,520 | 111,088 |
| 400 | 2,577  | 4,815 | 0,000  | 0,000   |
| 400 | 36,725 | 4,376 | 32,349 | 140,814 |
| 400 | 25,912 | 5,030 | 20,882 | 90,898  |
| 400 | 40,328 | 5,315 | 35,013 | 152,410 |
| 400 | 27,626 | 5,350 | 22,276 | 96,966  |
| 400 | 36,763 | 4,741 | 32,022 | 139,390 |
| 400 | 23,216 | 5,568 | 17,648 | 76,821  |
| 400 | 26,848 | 6,691 | 20,157 | 87,741  |
| 400 | 25,935 | 6,777 | 19,158 | 83,393  |
| 400 | 28,874 | 5,043 | 23,831 | 103,733 |
| 400 | 13,570 | 5,417 | 8,153  | 35,488  |
| 400 | 17,404 | 2,796 | 14,608 | 63,589  |
| 400 | 30,433 | 3,871 | 26,562 | 115,621 |
| 400 | 24,102 | 4,821 | 19,281 | 83,928  |
| 400 | 12,769 | 4,991 | 7,778  | 33,857  |
| 400 | 24,941 | 4,429 | 20,512 | 89,287  |
| 400 | 14,445 | 4,341 | 10,104 | 43,980  |
| 400 | 10,391 | 5,156 | 5,235  | 22,786  |

|     |        |       |       |        |
|-----|--------|-------|-------|--------|
| 100 | 28,555 | 3,248 | 25,31 | 109,12 |
| 200 | 26,914 | 1,817 | 25,10 | 108,21 |
| 200 | 60,056 | 2,847 | 57,21 | 246,67 |
| 200 | 63,843 | 2,437 | 61,41 | 264,77 |
| 200 | 22,419 | 2,424 | 20,00 | 86,21  |
| 200 | 26,286 | 2,663 | 23,62 | 101,86 |
| 200 | 68,753 | 2,39  | 66,36 | 286,15 |
| 200 | 21,657 | 2,462 | 19,20 | 82,77  |
| 200 | 38,056 | 2,55  | 35,51 | 153,10 |
| 200 | 40,635 | 1,754 | 38,88 | 167,65 |
| 200 | 11,352 | 1,832 | 9,52  | 41,05  |
| 200 | 20,686 | 2,033 | 18,65 | 80,43  |
| 200 | 15,076 | 1,058 | 14,02 | 60,44  |
| 200 | 21,324 | 1,461 | 19,86 | 85,65  |
| 200 | 36,194 | 1,844 | 34,35 | 148,11 |
| 200 | 16,161 | 1,828 | 14,33 | 61,80  |
| 200 | 26,784 | 2,706 | 24,08 | 103,82 |
| 200 | 17,548 | 1,838 | 15,71 | 67,74  |
| 200 | 15,841 | 1,658 | 14,18 | 61,15  |
| 200 | 12,111 | 1,672 | 10,44 | 45,01  |
| 200 | 13,967 | 1,69  | 12,28 | 52,94  |
| 200 | 11,003 | 1,558 | 9,45  | 40,73  |
| 200 | 40,557 | 1,631 | 38,93 | 167,84 |
| 200 | 26,837 | 2,469 | 24,37 | 105,07 |
| 200 | 13,903 | 2,417 | 11,49 | 49,53  |
| 200 | 42,594 | 1,785 | 40,81 | 175,96 |
| 200 | 28,916 | 3,829 | 25,09 | 108,17 |
| 200 | 19,815 | 3,777 | 16,04 | 69,15  |
| 200 | 38,136 | 2,628 | 35,51 | 153,10 |
| 200 | 14,82  | 1,883 | 12,94 | 55,78  |
| 200 | 25,081 | 2,65  | 22,43 | 96,72  |
| 200 | 37,031 | 3,354 | 33,68 | 145,21 |
| 200 | 28,896 | 3,552 | 25,34 | 109,28 |
| 200 | 49,379 | 3,979 | 45,40 | 195,76 |
| 200 | 28,458 | 3,632 | 24,83 | 107,05 |
| 200 | 23,277 | 1,96  | 21,32 | 91,92  |
| 200 | 20,668 | 2,317 | 18,35 | 79,13  |
| 200 | 18,476 | 3,593 | 14,88 | 64,17  |
| 200 | 17,462 | 3,811 | 13,65 | 58,86  |
| 200 | 20,39  | 3,704 | 16,69 | 71,95  |
| 200 | 15,541 | 2,697 | 12,84 | 55,38  |
| 200 | 56,999 | 1,061 | 55,94 | 241,19 |
| 200 | 34,488 | 2,245 | 32,24 | 139,03 |
| 200 | 15,615 | 2,252 | 13,36 | 57,62  |
| 200 | 13,498 | 2,192 | 11,31 | 48,75  |
| 200 | 20,74  | 2,303 | 18,44 | 79,50  |
| 200 | 18,81  | 2,248 | 16,56 | 71,41  |
| 200 | 16,142 | 2,147 | 14,00 | 60,34  |
| 200 | 55,804 | 2,771 | 53,03 | 228,67 |
| 200 | 12,337 | 3,145 | 9,19  | 39,63  |
| 200 | 27,277 | 2,367 | 24,91 | 107,41 |
| 200 | 29,86  | 1,782 | 28,08 | 121,07 |
| 200 | 42,664 | 1,729 | 40,94 | 176,50 |
| 200 | 43,426 | 2,111 | 41,32 | 178,14 |
| 200 | 29,75  | 2,177 | 27,57 | 118,89 |
| 200 | 22,591 | 2,43  | 20,16 | 86,93  |
| 200 | 31,657 | 1,385 | 30,27 | 130,53 |
| 200 | 67,45  | 3,38  | 64,07 | 276,26 |
| 200 | 36,84  | 3,355 | 33,49 | 144,38 |
| 200 | 19,681 | 2,627 | 17,05 | 73,53  |
| 200 | 41,942 | 2,9   | 39,04 | 168,34 |
| 200 | 14,678 | 2,521 | 12,16 | 52,42  |
| 200 | 15,021 | 2,085 | 12,94 | 55,78  |
| 200 | 18,642 | 1,316 | 17,33 | 74,71  |
| 200 | 51,146 | 1,348 | 49,80 | 214,72 |
| 200 | 29,342 | 2,315 | 27,03 | 116,54 |
| 200 | 41,17  | 2,125 | 39,05 | 168,36 |
| 200 | 47,053 | 2,305 | 44,75 | 192,95 |
| 200 | 12,366 | 2,912 | 9,45  | 40,76  |
| 200 | 24,349 | 2,357 | 21,99 | 94,83  |
| 200 | 19,26  | 1,578 | 17,68 | 76,24  |

|     |        |        |        |         |
|-----|--------|--------|--------|---------|
| 400 | 22,341 | 4,876  | 17,465 | 76,024  |
| 400 | 13,209 | 4,389  | 8,820  | 38,392  |
| 400 | 26,961 | 3,619  | 23,342 | 101,607 |
| 400 | 16,567 | 6,202  | 10,365 | 45,117  |
| 400 | 28,284 | 5,375  | 22,909 | 99,721  |
| 400 | 23,641 | 6,646  | 16,995 | 73,979  |
| 400 | 21,752 | 4,976  | 16,776 | 73,024  |
| 400 | 26,527 | 9,673  | 16,854 | 73,366  |
| 400 | 21,312 | 7,297  | 14,015 | 61,005  |
| 400 | 19,369 | 5,043  | 14,326 | 62,359  |
| 400 | 30,996 | 4,676  | 26,320 | 114,568 |
| 400 | 30,213 | 5,907  | 24,306 | 105,802 |
| 400 | 27,235 | 4,335  | 22,900 | 99,684  |
| 400 | 21,537 | 3,624  | 17,913 | 77,975  |
| 400 | 20,622 | 4,078  | 16,544 | 72,016  |
| 400 | 28,267 | 3,397  | 24,870 | 108,257 |
| 400 | 23,228 | 3,403  | 19,825 | 86,298  |
| 400 | 20,191 | 2,718  | 17,473 | 76,058  |
| 400 | 19,811 | 4,486  | 15,325 | 66,710  |
| 400 | 36,037 | 7,288  | 28,749 | 125,144 |
| 400 | 34,371 | 8,505  | 25,866 | 112,594 |
| 400 | 35,985 | 10,189 | 25,796 | 112,290 |
| 400 | 36,172 | 8,406  | 27,766 | 120,866 |
| 400 | 39,586 | 9,222  | 30,364 | 132,173 |
| 400 | 29,567 | 9,430  | 20,137 | 87,654  |
| 400 | 25,445 | 5,369  | 20,076 | 87,391  |
| 400 | 13,153 | 7,833  | 5,320  | 23,158  |
| 400 | 20,189 | 7,583  | 12,606 | 54,872  |
| 800 | 39,246 | 6,483  | 32,763 | 142,615 |
| 800 | 42,700 | 6,100  | 36,600 | 159,318 |
| 800 | 26,077 | 6,462  | 19,615 | 85,382  |
| 800 | 28,978 | 6,374  | 22,604 | 98,394  |
| 800 | 10,221 | 6,023  | 4,198  | 18,274  |
| 800 | 20,983 | 5,734  | 15,249 | 66,380  |
| 800 | 13,993 | 6,977  | 7,016  | 30,540  |
| 800 | 35,649 | 8,412  | 27,237 | 118,561 |
| 800 | 18,909 | 4,986  | 13,923 | 60,607  |
| 800 | 22,156 | 5,806  | 16,350 | 71,169  |
| 800 | 14,142 | 7,226  | 6,916  | 30,103  |
| 800 | 15,769 | 5,294  | 10,475 | 45,597  |
| 800 | 18,049 | 6,095  | 11,954 | 52,035  |
| 800 | 23,256 | 3,714  | 19,542 | 85,066  |
| 800 | 19,248 | 5,727  | 13,521 | 58,855  |
| 800 | 22,432 | 7,684  | 14,748 | 64,198  |
| 800 | 25,364 | 7,214  | 18,150 | 79,004  |
| 800 | 18,691 | 5,038  | 13,653 | 59,430  |
| 800 | 19,705 | 5,977  | 13,728 | 59,757  |
| 800 | 28,166 | 6,397  | 21,769 | 94,760  |
| 800 | 21,761 | 4,856  | 16,905 | 73,587  |
| 800 | 27,354 | 5,057  | 22,297 | 97,056  |
| 800 | 38,817 | 7,853  | 30,964 | 134,784 |
| 800 | 20,486 | 4,856  | 15,630 | 68,038  |
| 800 | 33,583 | 6,817  | 26,766 | 116,510 |
| 800 | 35,533 | 8,298  | 27,235 | 118,551 |
| 800 | 25,799 | 4,695  | 21,104 | 91,866  |
| 800 | 21,635 | 5,649  | 15,986 | 69,586  |
| 800 | 13,098 | 6,150  | 6,948  | 30,242  |
| 800 | 14,026 | 6,724  | 7,302  | 31,785  |
| 800 | 29,707 | 6,206  | 23,501 | 102,299 |
| 800 | 25,965 | 4,793  | 21,172 | 92,160  |
| 800 | 25,830 | 5,375  | 20,455 | 89,040  |
| 800 | 22,159 | 6,037  | 16,122 | 70,180  |
| 800 | 24,125 | 3,862  | 20,263 | 88,204  |
| 800 | 14,003 | 5,743  | 8,260  | 35,956  |
| 800 | 29,625 | 5,621  | 24,004 | 104,487 |
| 800 | 20,020 | 7,056  | 12,964 | 56,431  |
| 800 | 18,456 | 3,183  | 15,273 | 66,484  |
| 800 | 3,826  | 6,312  | 0,000  | 0,000   |
| 800 | 9,640  | 5,125  | 4,515  | 19,652  |
| 800 | 8,573  | 6,872  | 1,701  | 7,403   |
| 800 | 11,043 | 5,205  | 5,838  | 25,412  |

|     |        |       |       |        |
|-----|--------|-------|-------|--------|
| 200 | 10,798 | 2,3   | 8,50  | 36,64  |
| 200 | 16,788 | 2,423 | 14,37 | 61,94  |
| 200 | 11,878 | 1,545 | 10,33 | 44,55  |
| 200 | 62,052 | 1,744 | 60,31 | 260,04 |
| 200 | 17,647 | 2,794 | 14,85 | 64,04  |
| 200 | 13,959 | 2,215 | 11,74 | 50,64  |
| 200 | 19,453 | 2,117 | 17,34 | 74,75  |
| 400 | 12,513 | 1,777 | 10,74 | 46,29  |
| 400 | 21,363 | 1,609 | 19,75 | 85,18  |
| 400 | 9,721  | 1,51  | 8,21  | 35,40  |
| 400 | 17,294 | 1,533 | 15,76 | 67,96  |
| 400 | 17,767 | 1,757 | 16,01 | 69,03  |
| 400 | 14,675 | 1,471 | 13,20 | 56,93  |
| 400 | 13,486 | 1,397 | 12,09 | 52,13  |
| 400 | 15,98  | 1,403 | 14,58 | 62,85  |
| 400 | 24,107 | 1,624 | 22,48 | 96,94  |
| 400 | 17,754 | 2,125 | 15,63 | 67,39  |
| 400 | 16,773 | 2,27  | 14,50 | 62,53  |
| 400 | 23,971 | 2,912 | 21,06 | 90,80  |
| 400 | 27,838 | 2,087 | 25,75 | 111,03 |
| 400 | 9,82   | 1,914 | 7,91  | 34,09  |
| 400 | 18,923 | 1,992 | 16,93 | 73,00  |
| 400 | 21,805 | 2,379 | 19,43 | 83,76  |
| 400 | 23,99  | 1,893 | 22,10 | 95,28  |
| 400 | 46,339 | 2,893 | 43,45 | 187,33 |
| 400 | 24,143 | 2,062 | 22,08 | 95,21  |
| 400 | 27,628 | 2,513 | 25,12 | 108,29 |
| 400 | 33,971 | 4,077 | 29,89 | 128,90 |
| 400 | 44,265 | 4,208 | 40,06 | 172,72 |
| 400 | 19,138 | 2,849 | 16,29 | 70,24  |
| 400 | 14,733 | 4,036 | 10,70 | 46,12  |
| 400 | 22,364 | 3,455 | 18,91 | 81,53  |
| 400 | 49,685 | 4,034 | 45,65 | 196,84 |
| 400 | 41,726 | 3,45  | 38,28 | 165,04 |
| 400 | 21,378 | 3,64  | 17,74 | 76,48  |
| 400 | 47,847 | 3,496 | 44,35 | 191,23 |
| 400 | 17,991 | 3,491 | 14,50 | 62,52  |
| 400 | 26,222 | 3,434 | 22,79 | 98,26  |
| 400 | 20,639 | 3,198 | 17,44 | 75,20  |
| 400 | 23,06  | 3,494 | 19,57 | 84,37  |
| 400 | 49,787 | 3,081 | 46,71 | 201,39 |
| 400 | 28,865 | 3,558 | 25,31 | 109,12 |
| 400 | 44,448 | 3,586 | 40,86 | 176,19 |
| 400 | 17,897 | 3,121 | 14,78 | 63,71  |
| 400 | 18,181 | 3,219 | 14,96 | 64,51  |
| 400 | 43,885 | 4,57  | 39,32 | 169,52 |
| 400 | 24,086 | 4,718 | 19,37 | 83,51  |
| 400 | 16,523 | 4,098 | 12,43 | 53,57  |
| 400 | 24,551 | 4,392 | 20,16 | 86,92  |
| 400 | 17,085 | 3,926 | 13,16 | 56,74  |
| 400 | 17,163 | 3,09  | 14,07 | 60,68  |
| 400 | 31,465 | 3,536 | 27,93 | 120,42 |
| 400 | 18,144 | 3,447 | 14,70 | 63,37  |
| 400 | 25,268 | 3,785 | 21,48 | 92,63  |
| 400 | 14,451 | 3,549 | 10,90 | 47,01  |
| 400 | 13,119 | 3,401 | 9,72  | 41,90  |
| 400 | 19,317 | 2,893 | 16,42 | 70,82  |
| 400 | 32,514 | 3,656 | 28,86 | 124,43 |
| 400 | 17,428 | 3,203 | 14,23 | 61,34  |
| 400 | 20,135 | 2,476 | 17,66 | 76,14  |
| 400 | 13,36  | 3,427 | 9,93  | 42,83  |
| 800 | 14,386 | 1,715 | 12,67 | 54,64  |
| 800 | 12,597 | 1,785 | 10,81 | 46,62  |
| 800 | 18,828 | 1,539 | 17,29 | 74,55  |
| 800 | 21,407 | 2,248 | 19,16 | 82,61  |
| 800 | 30,718 | 1,987 | 28,73 | 123,88 |
| 800 | 10,912 | 1,753 | 9,16  | 39,49  |
| 800 | 14,974 | 1,8   | 13,17 | 56,80  |
| 800 | 12,448 | 2,399 | 10,05 | 43,33  |
| 800 | 10,415 | 1,739 | 8,68  | 37,41  |
| 800 | 13,104 | 1,865 | 11,24 | 48,46  |

|     |        |       |        |         |
|-----|--------|-------|--------|---------|
| 800 | 27,730 | 5,348 | 22,382 | 97,427  |
| 800 | 19,723 | 6,025 | 13,698 | 59,624  |
| 800 | 15,469 | 5,861 | 9,608  | 41,822  |
| 800 | 25,282 | 5,415 | 19,867 | 86,480  |
| 800 | 28,888 | 5,009 | 23,879 | 103,946 |
| 800 | 35,887 | 5,708 | 30,179 | 131,369 |
| 800 | 28,579 | 6,556 | 22,023 | 95,863  |
| 800 | 12,145 | 4,484 | 7,661  | 33,347  |
| 800 | 18,190 | 6,644 | 11,546 | 50,260  |
| 800 | 10,190 | 4,670 | 5,520  | 24,028  |
| 800 | 23,225 | 5,706 | 17,519 | 76,260  |
| 800 | 18,058 | 8,439 | 9,619  | 41,871  |
| 800 | 14,824 | 6,632 | 8,192  | 35,658  |
| 800 | 7,440  | 4,252 | 3,188  | 13,878  |
| 800 | 6,654  | 4,732 | 1,922  | 8,367   |

|     |        |       |       |        |
|-----|--------|-------|-------|--------|
| 800 | 15,759 | 1,838 | 13,92 | 60,02  |
| 800 | 13,15  | 2,14  | 11,01 | 47,47  |
| 800 | 16,29  | 1,578 | 14,71 | 63,44  |
| 800 | 10,136 | 2,069 | 8,07  | 34,78  |
| 800 | 11,564 | 2,061 | 9,50  | 40,98  |
| 800 | 12,025 | 2,166 | 9,86  | 42,51  |
| 800 | 12,258 | 1,925 | 10,33 | 44,55  |
| 800 | 8,865  | 1,938 | 6,93  | 29,87  |
| 800 | 6,88   | 2,15  | 4,73  | 20,39  |
| 800 | 34,04  | 3,219 | 30,82 | 132,89 |
| 800 | 26,608 | 3,308 | 23,30 | 100,47 |
| 800 | 30,893 | 3,508 | 27,39 | 118,08 |
| 800 | 30,07  | 3,681 | 26,39 | 113,78 |
| 800 | 32,761 | 3,556 | 29,21 | 125,93 |
| 800 | 18,194 | 3,315 | 14,88 | 64,16  |
| 800 | 16,765 | 3,076 | 13,69 | 59,02  |
| 800 | 45,535 | 3,617 | 41,92 | 180,74 |
| 800 | 17,456 | 4,19  | 13,27 | 57,20  |
| 800 | 34,526 | 4,457 | 30,07 | 129,65 |
| 800 | 15,747 | 3,111 | 12,64 | 54,48  |
| 800 | 13,269 | 3,289 | 9,98  | 43,03  |
| 800 | 20,95  | 3,953 | 17,00 | 73,29  |
| 800 | 17,204 | 2,431 | 14,77 | 63,70  |
| 800 | 13,895 | 4,505 | 9,39  | 40,49  |
| 800 | 16,235 | 3,397 | 12,84 | 55,36  |
| 800 | 26,632 | 2,364 | 24,27 | 104,64 |
| 800 | 13,663 | 3,443 | 10,22 | 44,07  |
| 800 | 21,583 | 3,206 | 18,38 | 79,24  |
| 800 | 12,642 | 4,027 | 8,62  | 37,15  |
| 800 | 10,816 | 3,068 | 7,75  | 33,41  |
| 800 | 11,599 | 3,609 | 7,99  | 34,45  |
| 800 | 14,257 | 4,755 | 9,50  | 40,97  |
| 800 | 12,127 | 3,118 | 9,01  | 38,85  |
| 800 | 31,099 | 3,236 | 27,86 | 120,14 |
| 800 | 16,898 | 3,395 | 13,50 | 58,22  |
| 800 | 16,177 | 3,1   | 13,08 | 56,39  |
| 800 | 41,001 | 3,459 | 37,54 | 161,87 |
| 800 | 15,736 | 3,103 | 12,63 | 54,47  |
| 800 | 38,299 | 3,215 | 35,08 | 151,28 |
| 800 | 14,412 | 2,403 | 12,01 | 51,78  |
| 800 | 19,644 | 3,388 | 16,26 | 70,09  |
| 800 | 26,885 | 3,266 | 23,62 | 101,84 |
| 800 | 28,218 | 2,698 | 25,52 | 110,04 |
| 800 | 12,825 | 3,79  | 9,04  | 38,96  |
| 800 | 21,352 | 2,412 | 18,94 | 81,67  |
| 800 | 41,84  | 2,082 | 39,76 | 171,43 |
| 800 | 13,806 | 2,509 | 11,30 | 48,71  |
| 800 | 15,301 | 2,43  | 12,87 | 55,50  |
| 800 | 45,49  | 3,702 | 41,79 | 180,18 |
| 800 | 25,636 | 4,76  | 20,88 | 90,01  |
| 800 | 21,012 | 3,768 | 17,24 | 74,35  |
| 800 | 30,448 | 2,789 | 27,66 | 119,26 |
| 800 | 10,617 | 2,227 | 8,39  | 36,18  |

| NacGal | IM CA  | IM BKG | CA-BKG | R%     |
|--------|--------|--------|--------|--------|
| 0      | 36,273 | 1,696  | 34,58  | 267,05 |
| 0      | 27,665 | 2,298  | 25,37  | 195,92 |
| 0      | 15,555 | 1,235  | 14,32  | 110,60 |
| 0      | 6,865  | 2,71   | 4,16   | 32,09  |
| 0      | 31,221 | 1,955  | 29,27  | 226,03 |
| 0      | 23,379 | 7,664  | 15,72  | 121,37 |
| 0      | 5,776  | 1,968  | 3,81   | 29,41  |
| 0      | 12,604 | 1,588  | 11,02  | 85,08  |
| 0      | 8,93   | 1,303  | 7,63   | 58,91  |
| 0      | 7,261  | 2,198  | 5,06   | 39,10  |
| 0      | 5,294  | 3,221  | 2,07   | 16,01  |
| 0      | 3,89   | 1,504  | 2,39   | 18,43  |
| 50     | 7,174  | 1,575  | 5,60   | 43,24  |
| 50     | 12,403 | 2,061  | 10,34  | 79,87  |
| 50     | 10,104 | 1,856  | 8,25   | 63,70  |
| 50     | 3,274  | 1,613  | 1,66   | 12,83  |

|     |        |       |       |        |
|-----|--------|-------|-------|--------|
| 50  | 10,051 | 2,419 | 7,63  | 58,94  |
| 50  | 5,564  | 1,341 | 4,22  | 32,62  |
| 50  | 3,811  | 1,387 | 2,42  | 18,72  |
| 50  | 7,377  | 2,066 | 5,31  | 41,02  |
| 50  | 12,845 | 1,243 | 11,60 | 89,61  |
| 50  | 18,292 | 2,383 | 15,91 | 122,87 |
| 50  | 14,48  | 1,828 | 12,65 | 97,72  |
| 50  | 10,597 | 3,021 | 7,58  | 58,51  |
| 50  | 15,949 | 1,271 | 14,68 | 113,36 |
| 50  | 16,631 | 1,354 | 15,28 | 117,99 |
| 50  | 11,794 | 2,612 | 9,18  | 70,92  |
| 50  | 12,47  | 2,746 | 9,72  | 75,10  |
| 50  | 7,172  | 1,854 | 5,32  | 41,07  |
| 50  | 8,85   | 1,965 | 6,89  | 53,18  |
| 50  | 10,367 | 2,449 | 7,92  | 61,15  |
| 50  | 6,626  | 2,628 | 4,00  | 30,88  |
| 50  | 9,754  | 1,773 | 7,98  | 61,64  |
| 50  | 9,179  | 1,752 | 7,43  | 57,36  |
| 50  | 13,865 | 1,56  | 12,31 | 95,04  |
| 50  | 11,509 | 1,608 | 9,90  | 76,47  |
| 50  | 17,37  | 2,831 | 14,54 | 112,29 |
| 50  | 9,686  | 3,512 | 6,17  | 47,68  |
| 50  | 10,748 | 3,159 | 7,59  | 58,61  |
| 50  | 6,629  | 3,287 | 3,34  | 25,81  |
| 50  | 8,157  | 3,194 | 4,96  | 38,33  |
| 50  | 8,699  | 4,865 | 3,83  | 29,61  |
| 50  | 7,615  | 4,151 | 3,46  | 26,75  |
| 100 | 7,244  | 1,109 | 6,14  | 47,38  |
| 100 | 5,733  | 2,676 | 3,06  | 23,61  |
| 100 | 5,617  | 2,834 | 2,78  | 21,49  |
| 100 | 3,903  | 2,992 | 0,91  | 7,04   |
| 100 | 6,061  | 3,453 | 2,61  | 20,14  |
| 100 | 41,676 | 3,829 | 37,85 | 292,31 |
| 100 | 10,558 | 3,224 | 7,33  | 56,64  |
| 100 | 20,719 | 4,068 | 16,65 | 128,60 |
| 100 | 33,042 | 4,862 | 28,18 | 217,64 |
| 100 | 9,67   | 3,712 | 5,96  | 46,02  |
| 100 | 7,115  | 2,62  | 4,50  | 34,72  |
| 200 | 11,42  | 2,16  | 9,26  | 71,52  |
| 200 | 9,515  | 2,437 | 7,08  | 54,67  |
| 200 | 20,306 | 1,538 | 18,77 | 144,95 |
| 200 | 22,731 | 1,413 | 21,32 | 164,65 |
| 200 | 7,719  | 2,595 | 5,12  | 39,57  |
| 200 | 29,45  | 3,43  | 26,02 | 200,96 |
| 200 | 12,779 | 3,454 | 9,33  | 72,02  |
| 200 | 5,605  | 3,407 | 2,20  | 16,98  |
| 200 | 7,224  | 3,482 | 3,74  | 28,90  |
| 200 | 20,019 | 1,922 | 18,10 | 139,77 |
| 200 | 4,677  | 3,406 | 1,27  | 9,82   |
| 200 | 4,551  | 1,343 | 3,21  | 24,78  |
| 200 | 10,957 | 1,052 | 9,91  | 76,50  |
| 400 | 14,039 | 1,993 | 12,05 | 93,04  |
| 400 | 6,935  | 1,276 | 5,66  | 43,71  |
| 400 | 4,208  | 2,099 | 2,11  | 16,29  |
| 400 | 5,834  | 2,363 | 3,47  | 26,81  |
| 400 | 16,188 | 2,212 | 13,98 | 107,94 |
| 400 | 6,245  | 2,292 | 3,95  | 30,53  |
| 400 | 9,257  | 2,312 | 6,95  | 53,64  |
| 400 | 9,44   | 6,752 | 2,69  | 20,76  |
| 400 | 5,793  | 3,45  | 2,34  | 18,10  |
| 400 | 5,624  | 3,55  | 2,07  | 16,02  |
| 400 | 4,144  | 2,206 | 1,94  | 14,97  |
| 400 | 4,255  | 3,404 | 0,85  | 6,57   |
| 400 | 13,245 | 3,705 | 9,54  | 73,68  |
| 400 | 13,382 | 1,879 | 11,50 | 88,84  |
| 400 | 14,415 | 2,551 | 11,86 | 91,63  |
| 400 | 17,881 | 2,55  | 15,33 | 118,41 |
| 400 | 10,596 | 2,398 | 8,20  | 63,32  |
| 400 | 7,42   | 2,87  | 4,55  | 35,14  |
| 400 | 16,973 | 1,911 | 15,06 | 116,33 |
| 400 | 15,921 | 2,011 | 13,91 | 107,43 |

|     |        |       |       |        |
|-----|--------|-------|-------|--------|
| 400 | 14,843 | 3,015 | 11,83 | 91,35  |
| 400 | 11,805 | 2,993 | 8,81  | 68,06  |
| 400 | 9,644  | 1,891 | 7,75  | 59,88  |
| 400 | 5,094  | 1,463 | 3,63  | 28,04  |
| 800 | 16,155 | 4,164 | 11,99 | 92,61  |
| 800 | 18,564 | 2,496 | 16,07 | 124,10 |
| 800 | 11,428 | 5,078 | 6,35  | 49,04  |
| 800 | 17,764 | 4,77  | 12,99 | 100,36 |
| 800 | 6,626  | 1,242 | 5,38  | 41,58  |
| 800 | 7,061  | 4,75  | 2,31  | 17,85  |
| 800 | 13,257 | 5,629 | 7,63  | 58,91  |
| 800 | 14,013 | 4,936 | 9,08  | 70,10  |
| 800 | 11,556 | 5,227 | 6,33  | 48,88  |
| 800 | 17,737 | 4,793 | 12,94 | 99,97  |
| 800 | 6,761  | 4,385 | 2,38  | 18,35  |
| 800 | 11,312 | 5,084 | 6,23  | 48,10  |

| Nacglu | IM CA  | IM BKG | CA-BKG | RI%    |
|--------|--------|--------|--------|--------|
| 0      | 36,273 | 1,696  | 34,58  | 267,05 |
| 0      | 27,665 | 2,298  | 25,37  | 195,92 |
| 0      | 15,555 | 1,235  | 14,32  | 110,60 |
| 0      | 6,865  | 2,71   | 4,16   | 32,09  |
| 0      | 31,221 | 1,955  | 29,27  | 226,03 |
| 0      | 23,379 | 7,664  | 15,72  | 121,37 |
| 0      | 5,776  | 1,968  | 3,81   | 29,41  |
| 0      | 12,604 | 1,588  | 11,02  | 85,08  |
| 0      | 8,93   | 1,303  | 7,63   | 58,91  |
| 0      | 7,261  | 2,198  | 5,06   | 39,10  |
| 0      | 5,294  | 3,221  | 2,07   | 16,01  |
| 0      | 3,89   | 1,504  | 2,39   | 18,43  |
| 50     | 5,007  | 2,635  | 2,37   | 18,32  |
| 50     | 16,705 | 2,039  | 14,67  | 113,27 |
| 50     | 39,78  | 4,463  | 35,32  | 272,77 |
| 50     | 50,907 | 5,283  | 45,62  | 352,37 |
| 50     | 31,028 | 4,176  | 26,85  | 207,39 |
| 50     | 16,458 | 4,104  | 12,35  | 95,41  |
| 50     | 7,284  | 4,02   | 3,26   | 25,21  |
| 50     | 6,551  | 3,087  | 3,46   | 26,75  |
| 50     | 5,339  | 2,346  | 2,99   | 23,12  |
| 50     | 7,583  | 1,89   | 5,69   | 43,97  |
| 50     | 13,988 | 3,102  | 10,89  | 84,08  |
| 100    | 5,534  | 1,642  | 3,89   | 30,06  |
| 100    | 7,73   | 2,023  | 5,71   | 44,08  |
| 100    | 4,068  | 1,896  | 2,17   | 16,78  |
| 100    | 4,392  | 1,744  | 2,65   | 20,45  |
| 100    | 13,373 | 2,499  | 10,87  | 83,98  |
| 100    | 11,819 | 3,233  | 8,59   | 66,31  |
| 100    | 9,396  | 2,328  | 7,07   | 54,59  |
| 100    | 4,584  | 2,461  | 2,12   | 16,40  |
| 100    | 24,769 | 3,019  | 21,75  | 167,98 |
| 100    | 16,454 | 2,449  | 14,01  | 108,17 |
| 100    | 6,935  | 1,924  | 5,01   | 38,70  |
| 100    | 12,942 | 2,51   | 10,43  | 80,57  |
| 100    | 8,204  | 3,362  | 4,84   | 37,40  |
| 100    | 7,793  | 4,102  | 3,69   | 28,51  |
| 100    | 8,37   | 3,436  | 4,93   | 38,11  |
| 100    | 11,355 | 5,393  | 5,96   | 46,05  |
| 200    | 6,797  | 3,753  | 3,04   | 23,51  |
| 200    | 4,722  | 3,115  | 1,61   | 12,41  |
| 200    | 7,467  | 3,174  | 4,29   | 33,16  |
| 200    | 10,159 | 2,5    | 7,66   | 59,15  |
| 200    | 6,623  | 3,028  | 3,60   | 27,77  |
| 200    | 10,725 | 1,563  | 9,16   | 70,76  |
| 200    | 5,038  | 3,168  | 1,87   | 14,44  |
| 200    | 7,073  | 2,157  | 4,92   | 37,97  |
| 200    | 7,828  | 2,846  | 4,98   | 38,48  |
| 200    | 18,119 | 2,853  | 15,27  | 117,90 |
| 200    | 16,119 | 3,078  | 13,04  | 100,72 |
| 200    | 16,952 | 2,592  | 14,36  | 110,91 |
| 200    | 4,264  | 2,06   | 2,20   | 17,02  |
| 200    | 7,628  | 1,675  | 5,95   | 45,98  |

|     |        |       |       |        |
|-----|--------|-------|-------|--------|
| 200 | 4,957  | 2,433 | 2,52  | 19,49  |
| 200 | 7,578  | 1,705 | 5,87  | 45,36  |
| 200 | 9,109  | 5,38  | 3,73  | 28,80  |
| 200 | 14,392 | 5,742 | 8,65  | 66,81  |
| 200 | 9,827  | 1,962 | 7,87  | 60,74  |
| 200 | 9,713  | 4,123 | 5,59  | 43,17  |
| 200 | 13,64  | 2,781 | 10,86 | 83,87  |
| 200 | 40,117 | 4,405 | 35,71 | 275,82 |
| 200 | 28,961 | 1,839 | 27,12 | 209,47 |
| 200 | 33,627 | 5,354 | 28,27 | 218,36 |
| 400 | 15,222 | 3,528 | 11,69 | 90,32  |
| 400 | 24,576 | 2,626 | 21,95 | 169,53 |
| 400 | 10,161 | 3,163 | 7,00  | 54,05  |
| 400 | 15,323 | 2,31  | 13,01 | 100,50 |
| 400 | 10,991 | 2,904 | 8,09  | 62,46  |
| 400 | 4,888  | 2,028 | 2,86  | 22,09  |
| 400 | 12,542 | 3,019 | 9,52  | 73,55  |
| 400 | 10,198 | 2,02  | 8,18  | 63,16  |
| 400 | 36,752 | 2,334 | 34,42 | 265,82 |
| 400 | 32,803 | 1,971 | 30,83 | 238,13 |
| 400 | 19,38  | 2,501 | 16,88 | 130,36 |
| 400 | 32,542 | 3,83  | 28,71 | 221,75 |
| 400 | 10,388 | 2,919 | 7,47  | 57,69  |
| 400 | 30,934 | 2,085 | 28,85 | 222,81 |
| 800 | 4,973  | 1,227 | 3,75  | 28,93  |
| 800 | 10,654 | 1,019 | 9,64  | 74,41  |
| 800 | 7,508  | 1,325 | 6,18  | 47,75  |
| 800 | 9,29   | 1,95  | 7,34  | 56,69  |
| 800 | 7,017  | 2,237 | 4,78  | 36,92  |
| 800 | 9,139  | 2,319 | 6,82  | 52,67  |
| 800 | 12,883 | 3,06  | 9,82  | 75,87  |
| 800 | 5,481  | 1,714 | 3,77  | 29,09  |
| 800 | 7,925  | 2,364 | 5,56  | 42,95  |
| 800 | 4,477  | 1,339 | 3,14  | 24,24  |
| 800 | 11,198 | 1,404 | 9,79  | 75,64  |
| 800 | 16,108 | 2,272 | 13,84 | 106,86 |
| 800 | 7,101  | 2,695 | 4,41  | 34,03  |
| 800 | 9,501  | 2,784 | 6,72  | 51,88  |
| 800 | 6,242  | 2,296 | 3,95  | 30,48  |
| 800 | 31,7   | 2,336 | 29,36 | 226,79 |
| 800 | 22,332 | 1,563 | 20,77 | 160,41 |
| 800 | 36,659 | 4,519 | 32,14 | 248,23 |
| 800 | 9,447  | 4,146 | 5,30  | 40,94  |
| 800 | 9,718  | 1,965 | 7,75  | 59,88  |
| 800 | 3,3    | 0,597 | 2,70  | 20,88  |
| 800 | 10,184 | 2,226 | 7,96  | 61,46  |
| 800 | 3,025  | 2,227 | 0,80  | 6,16   |
| 800 | 4,453  | 2,057 | 2,40  | 18,51  |
| 800 | 12,342 | 1,888 | 10,45 | 80,74  |
| 800 | 5,353  | 2,332 | 3,02  | 23,33  |
| 800 | 5,627  | 1,632 | 4,00  | 30,85  |
| 800 | 14,629 | 2,471 | 12,16 | 93,90  |
| 800 | 7,905  | 1,613 | 6,29  | 48,60  |
| 800 | 14,933 | 1,847 | 13,09 | 101,07 |
| 800 | 21,575 | 2,161 | 19,41 | 149,94 |
| 800 | 13,163 | 2,791 | 10,37 | 80,11  |
